# Supplementary material for: Discovery of Novel Tetrahydro-β-carboline Containing Aminopeptidase N Inhibitors as Cancer Chemosensitizers
Source: PubMed Central journal article supplement (PMC9168271; doi:10.3389/fonc.2022.894842), 2022-05-23
Supplement: DataSheet_1.pdf [file DataSheet_1.pdf]

Discovery of Novel Tetrahydro- $\beta$ -carboline Containing Aminopeptidase N Inhibitors  
as Cancer Chemosensitizers

Xiaoyan Xing<sup>a†</sup>, Fahui Li<sup>b†</sup>, Yajie Hu<sup>b†</sup>, Lin Zhang<sup>b</sup>, Qian Hui<sup>b</sup>, Hongyu Qin<sup>b</sup>, Qixiao Jiang<sup>c</sup>, Wenyan Jiang<sup>b</sup>, Chunyan Fang<sup>a\*</sup> and Lei Zhang<sup>b\*</sup>

<sup>a</sup> *Department of Pharmacology, School of Pharmacy, Weifang Medical University, Weifang, Shandong, China;*

<sup>b</sup> *Department of Medicinal Chemistry, School of Pharmacy, Weifang Medical University, Weifang, Shandong, China;*

<sup>c</sup> *Department of Toxicology, School of Public Health, Qingdao University, Qingdao, Shandong, China.*

<sup>†</sup>*These authors have contributed equally to this work.*

Author for correspondence: Chunyan Fang, 13853660344@163.com; Lei Zhang, Tel./fax: +86-536-8462014, E-mail: leizhangchemical@gmail.com.

# Contents

|                                                          |    |
|----------------------------------------------------------|----|
| HRMS and <sup>1</sup> H-NMR spectrum of <b>B1</b> .....  | 6  |
| HRMS and <sup>1</sup> H-NMR spectrum of <b>B2</b> .....  | 7  |
| HRMS and <sup>1</sup> H-NMR spectrum of <b>B3</b> .....  | 8  |
| HRMS and <sup>1</sup> H-NMR spectrum of <b>B4</b> .....  | 9  |
| HRMS and <sup>1</sup> H-NMR spectrum of <b>B5</b> .....  | 10 |
| HRMS and <sup>1</sup> H-NMR spectrum of <b>B6</b> .....  | 11 |
| HRMS and <sup>1</sup> H-NMR spectrum of <b>B7</b> .....  | 12 |
| HRMS and <sup>1</sup> H-NMR spectrum of <b>B8</b> .....  | 13 |
| HRMS and <sup>1</sup> H-NMR spectrum of <b>B9</b> .....  | 14 |
| HRMS and <sup>1</sup> H-NMR spectrum of <b>B10</b> ..... | 15 |
| HRMS and <sup>1</sup> H-NMR spectrum of <b>B11</b> ..... | 16 |
| HRMS and <sup>1</sup> H-NMR spectrum of <b>B12</b> ..... | 17 |
| HRMS and <sup>1</sup> H-NMR spectrum of <b>B13</b> ..... | 18 |
| HRMS and <sup>1</sup> H-NMR spectrum of <b>B14</b> ..... | 19 |
| HRMS and <sup>1</sup> H-NMR spectrum of <b>B15</b> ..... | 20 |
| HRMS and <sup>1</sup> H-NMR spectrum of <b>B16</b> ..... | 21 |
| HRMS and <sup>1</sup> H-NMR spectrum of <b>B17</b> ..... | 22 |
| HRMS and <sup>1</sup> H-NMR spectrum of <b>C1</b> .....  | 23 |
| HRMS and <sup>1</sup> H-NMR spectrum of <b>C2</b> .....  | 24 |
| HRMS and <sup>1</sup> H-NMR spectrum of <b>C3</b> .....  | 25 |
| HRMS and <sup>1</sup> H-NMR spectrum of <b>C4</b> .....  | 26 |
| HRMS and <sup>1</sup> H-NMR spectrum of <b>C5</b> .....  | 27 |
| HRMS and <sup>1</sup> H-NMR spectrum of <b>C6</b> .....  | 28 |

|                                                          |    |
|----------------------------------------------------------|----|
| HRMS and <sup>1</sup> H-NMR spectrum of <b>C7</b> .....  | 29 |
| HRMS and <sup>1</sup> H-NMR spectrum of <b>C8</b> .....  | 30 |
| HRMS and <sup>1</sup> H-NMR spectrum of <b>C9</b> .....  | 31 |
| HRMS and <sup>1</sup> H-NMR spectrum of <b>C10</b> ..... | 32 |
| HRMS and <sup>1</sup> H-NMR spectrum of <b>C11</b> ..... | 33 |
| HRMS and <sup>1</sup> H-NMR spectrum of <b>C12</b> ..... | 34 |
| HRMS and <sup>1</sup> H-NMR spectrum of <b>C13</b> ..... | 35 |
| HRMS and <sup>1</sup> H-NMR spectrum of <b>C14</b> ..... | 36 |
| HRMS and <sup>1</sup> H-NMR spectrum of <b>C15</b> ..... | 37 |
| HRMS and <sup>1</sup> H-NMR spectrum of <b>C16</b> ..... | 38 |
| HRMS and <sup>1</sup> H-NMR spectrum of <b>C17</b> ..... | 39 |
| HRMS and <sup>1</sup> H-NMR spectrum of <b>C18</b> ..... | 40 |
| HRMS and <sup>1</sup> H-NMR spectrum of <b>C19</b> ..... | 41 |
| HRMS and <sup>1</sup> H-NMR spectrum of <b>C20</b> ..... | 42 |
| HRMS and <sup>1</sup> H-NMR spectrum of <b>C21</b> ..... | 43 |
| HRMS and <sup>1</sup> H-NMR spectrum of <b>C22</b> ..... | 44 |
| HRMS and <sup>1</sup> H-NMR spectrum of <b>C23</b> ..... | 45 |
| HRMS and <sup>1</sup> H-NMR spectrum of <b>C24</b> ..... | 46 |
| HRMS and <sup>1</sup> H-NMR spectrum of <b>C25</b> ..... | 47 |
| HRMS and <sup>1</sup> H-NMR spectrum of <b>C26</b> ..... | 48 |
| HRMS and <sup>1</sup> H-NMR spectrum of <b>C27</b> ..... | 49 |
| HRMS and <sup>1</sup> H-NMR spectrum of <b>C28</b> ..... | 50 |
| HRMS and <sup>1</sup> H-NMR spectrum of <b>C29</b> ..... | 51 |
| HRMS and <sup>1</sup> H-NMR spectrum of <b>D1</b> .....  | 52 |

|                                                           |    |
|-----------------------------------------------------------|----|
| <sup>13</sup> C-NMR and HPLC spectrum of <b>D1</b> .....  | 53 |
| HRMS and <sup>1</sup> H-NMR spectrum of <b>D2</b> .....   | 54 |
| <sup>13</sup> C-NMR and HPLC spectrum of <b>D2</b> .....  | 55 |
| HRMS and <sup>1</sup> H-NMR spectrum of <b>D3</b> .....   | 56 |
| <sup>13</sup> C-NMR and HPLC spectrum of <b>D3</b> .....  | 57 |
| HRMS and <sup>1</sup> H-NMR spectrum of <b>D4</b> .....   | 58 |
| <sup>13</sup> C-NMR and HPLC spectrum of <b>D4</b> .....  | 59 |
| HRMS and <sup>1</sup> H-NMR spectrum of <b>D5</b> .....   | 60 |
| <sup>13</sup> C-NMR and HPLC spectrum of <b>D5</b> .....  | 61 |
| HRMS and <sup>1</sup> H-NMR spectrum of <b>D6</b> .....   | 62 |
| <sup>13</sup> C-NMR and HPLC spectrum of <b>D6</b> .....  | 63 |
| HRMS and <sup>1</sup> H-NMR spectrum of <b>D7</b> .....   | 64 |
| <sup>13</sup> C-NMR and HPLC spectrum of <b>D7</b> .....  | 65 |
| HRMS and <sup>1</sup> H-NMR spectrum of <b>D8</b> .....   | 66 |
| <sup>13</sup> C-NMR and HPLC spectrum of <b>D8</b> .....  | 67 |
| HRMS and <sup>1</sup> H-NMR spectrum of <b>D9</b> .....   | 68 |
| <sup>13</sup> C-NMR and HPLC spectrum of <b>D9</b> .....  | 69 |
| HRMS and <sup>1</sup> H-NMR spectrum of <b>D10</b> .....  | 70 |
| <sup>13</sup> C-NMR and HPLC spectrum of <b>D10</b> ..... | 71 |
| HRMS and <sup>1</sup> H-NMR spectrum of <b>D11</b> .....  | 72 |
| <sup>13</sup> C-NMR and HPLC spectrum of <b>D11</b> ..... | 73 |
| HRMS and <sup>1</sup> H-NMR spectrum of <b>D12</b> .....  | 74 |
| <sup>13</sup> C-NMR and HPLC spectrum of <b>D12</b> ..... | 75 |
| HRMS and <sup>1</sup> H-NMR spectrum of <b>D13</b> .....  | 76 |

|                                                           |     |
|-----------------------------------------------------------|-----|
| <sup>13</sup> C-NMR and HPLC spectrum of <b>D13</b> ..... | 77  |
| HRMS and <sup>1</sup> H-NMR spectrum of <b>D14</b> .....  | 78  |
| <sup>13</sup> C-NMR and HPLC spectrum of <b>D14</b> ..... | 79  |
| HRMS and <sup>1</sup> H-NMR spectrum of <b>D15</b> .....  | 80  |
| <sup>13</sup> C-NMR and HPLC spectrum of <b>D15</b> ..... | 81  |
| HRMS and <sup>1</sup> H-NMR spectrum of <b>D16</b> .....  | 82  |
| <sup>13</sup> C-NMR and HPLC spectrum of <b>D16</b> ..... | 83  |
| HRMS and <sup>1</sup> H-NMR spectrum of <b>D17</b> .....  | 84  |
| <sup>13</sup> C-NMR and HPLC spectrum of <b>D17</b> ..... | 85  |
| HRMS and <sup>1</sup> H-NMR spectrum of <b>D18</b> .....  | 86  |
| <sup>13</sup> C-NMR and HPLC spectrum of <b>D18</b> ..... | 87  |
| HRMS and <sup>1</sup> H-NMR spectrum of <b>D19</b> .....  | 88  |
| <sup>13</sup> C-NMR and HPLC spectrum of <b>D19</b> ..... | 89  |
| HRMS and <sup>1</sup> H-NMR spectrum of <b>D20</b> .....  | 90  |
| <sup>13</sup> C-NMR and HPLC spectrum of <b>D20</b> ..... | 91  |
| HRMS and <sup>1</sup> H-NMR spectrum of <b>D21</b> .....  | 92  |
| <sup>13</sup> C-NMR and HPLC spectrum of <b>D21</b> ..... | 93  |
| HRMS and <sup>1</sup> H-NMR spectrum of <b>D22</b> .....  | 94  |
| <sup>13</sup> C-NMR and HPLC spectrum of <b>D22</b> ..... | 95  |
| HRMS and <sup>1</sup> H-NMR spectrum of <b>D23</b> .....  | 96  |
| <sup>13</sup> C-NMR and HPLC spectrum of <b>D23</b> ..... | 97  |
| HRMS and <sup>1</sup> H-NMR spectrum of <b>D24</b> .....  | 98  |
| <sup>13</sup> C-NMR and HPLC spectrum of <b>D24</b> ..... | 99  |
| HRMS and <sup>1</sup> H-NMR spectrum of <b>D25</b> .....  | 100 |

|                                                           |     |
|-----------------------------------------------------------|-----|
| <sup>13</sup> C-NMR and HPLC spectrum of <b>D25</b> ..... | 101 |
| HRMS and <sup>1</sup> H-NMR spectrum of <b>D26</b> .....  | 102 |
| <sup>13</sup> C-NMR and HPLC spectrum of <b>D26</b> ..... | 103 |
| HRMS and <sup>1</sup> H-NMR spectrum of <b>D27</b> .....  | 104 |
| <sup>13</sup> C-NMR and HPLC spectrum of <b>D27</b> ..... | 105 |
| HRMS and <sup>1</sup> H-NMR spectrum of <b>D28</b> .....  | 106 |
| <sup>13</sup> C-NMR and HPLC spectrum of <b>D28</b> ..... | 107 |
| HRMS and <sup>1</sup> H-NMR spectrum of <b>D29</b> .....  | 108 |
| <sup>13</sup> C-NMR and HPLC spectrum of <b>D29</b> ..... | 109 |

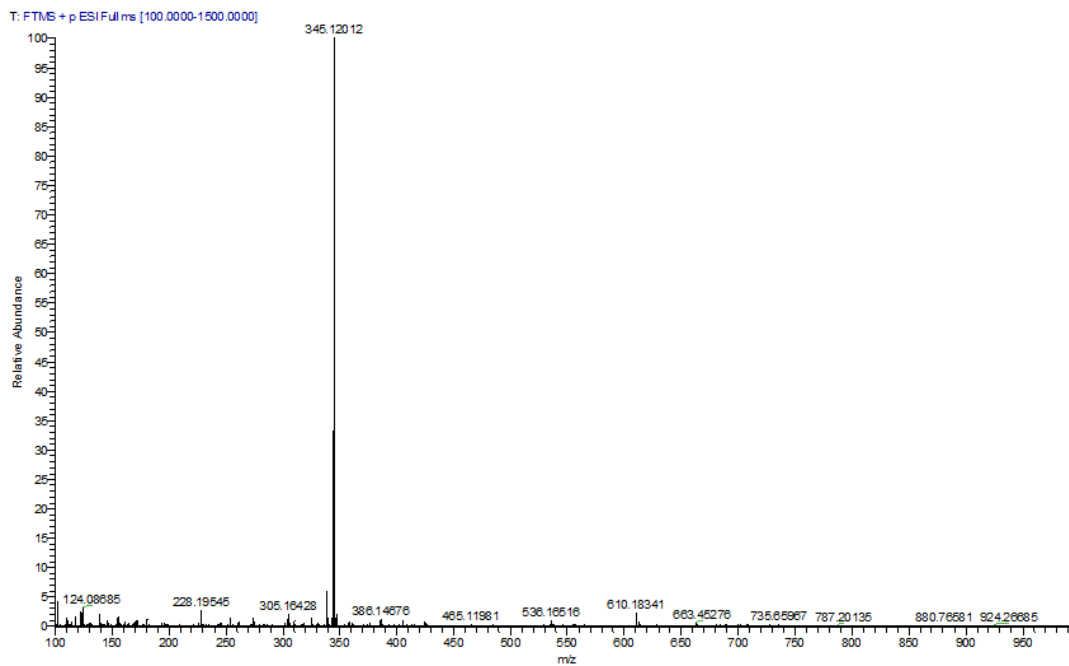

HRMS spectrum of **B1**

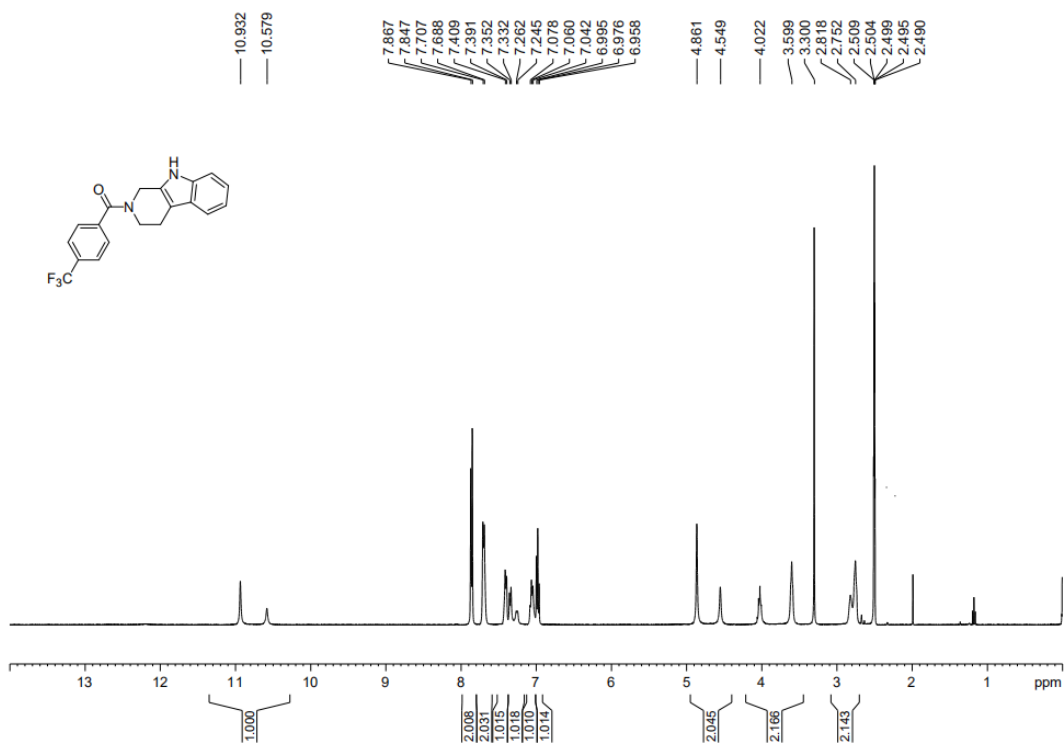

$^1\text{H}$  NMR spectrum of **B1**

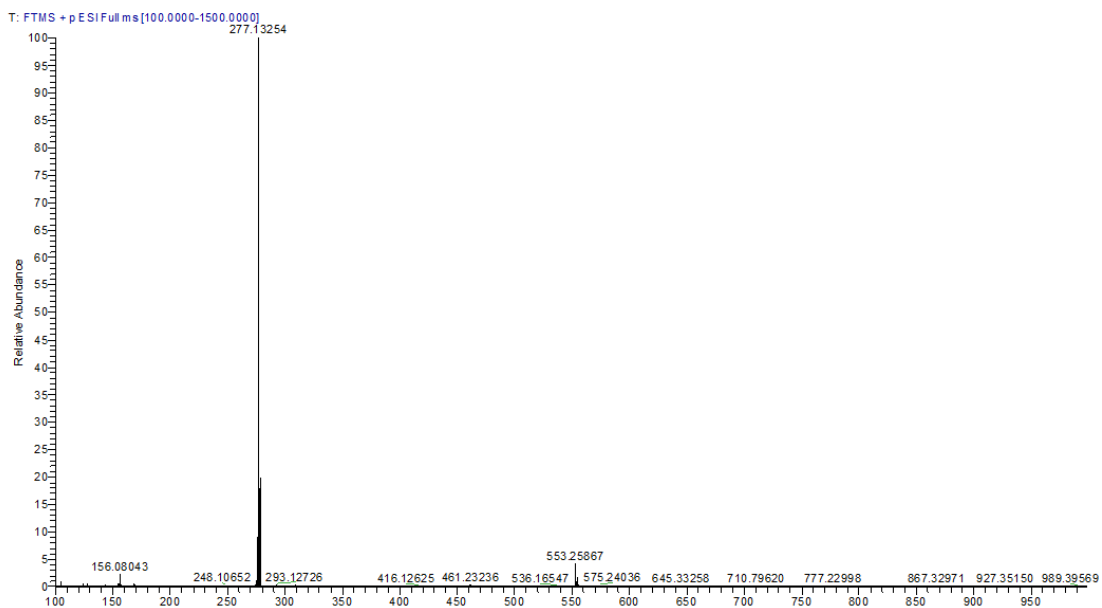

HRMS spectrum of **B2**

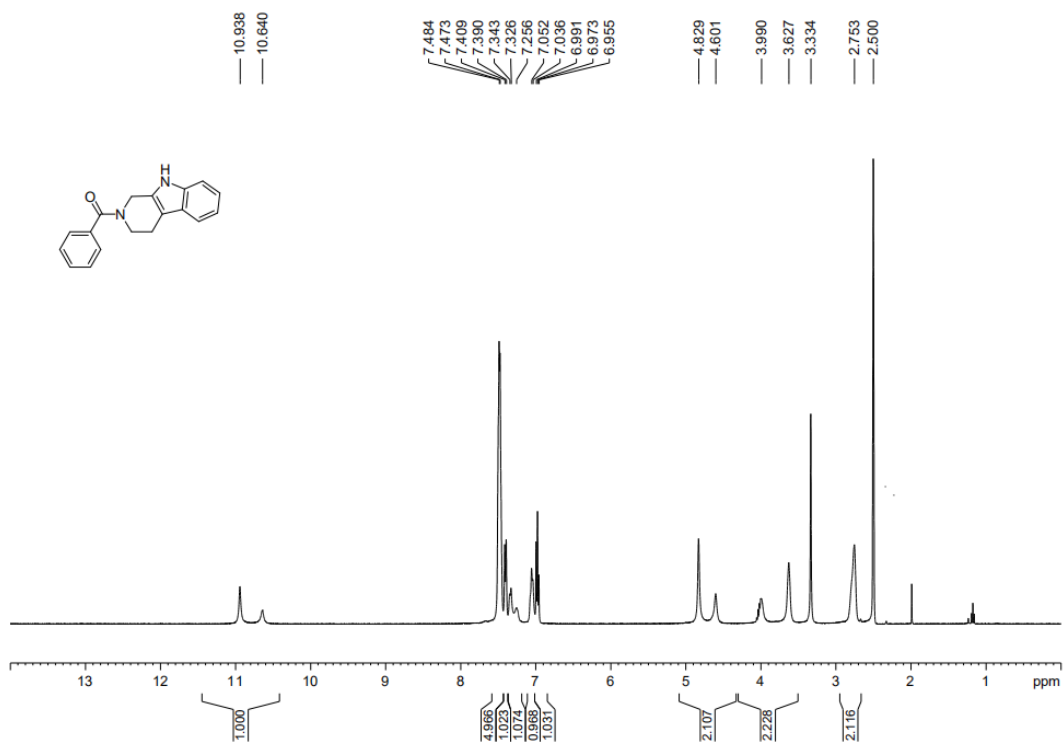

$^1\text{H}$  NMR spectrum of **B2**



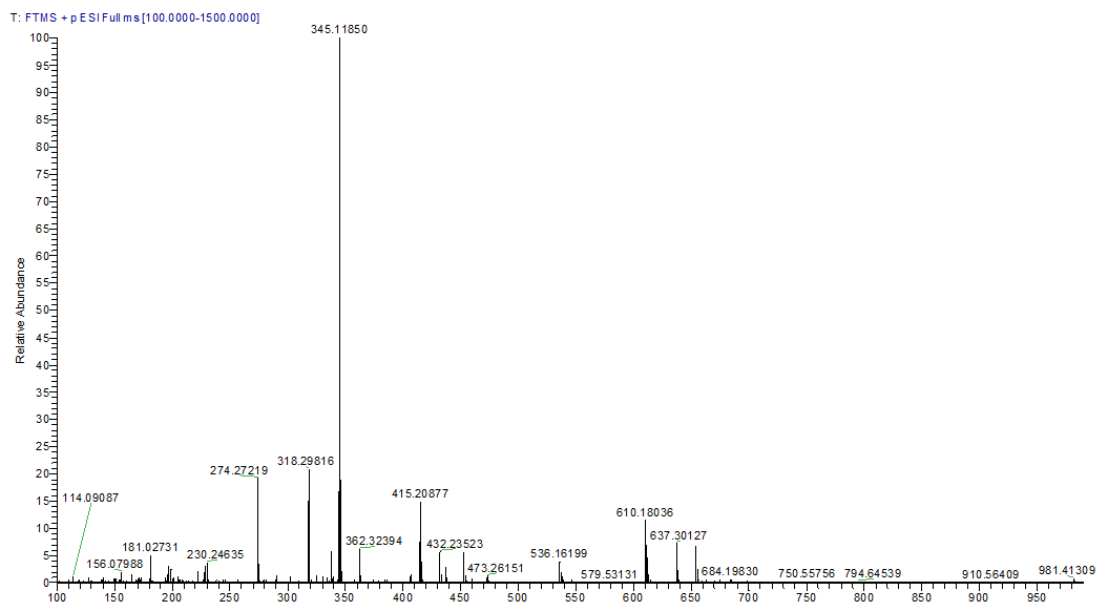

HRMS spectrum of **B3**

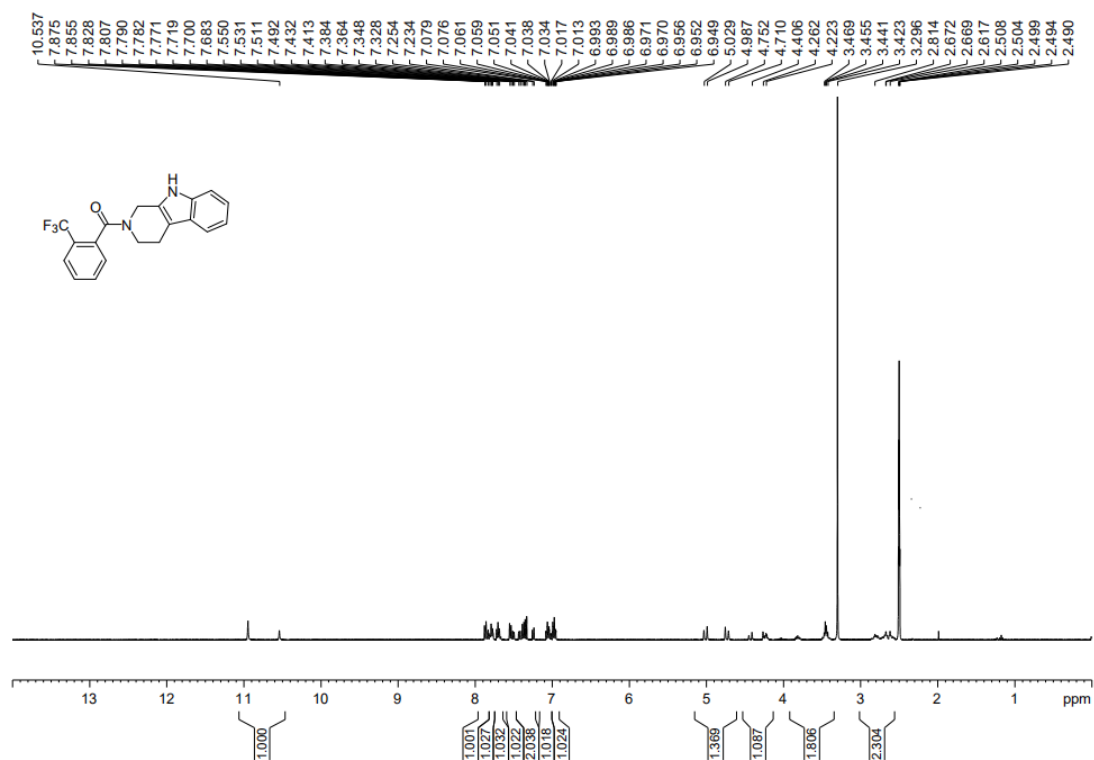

<sup>1</sup>H NMR spectrum of **B3**

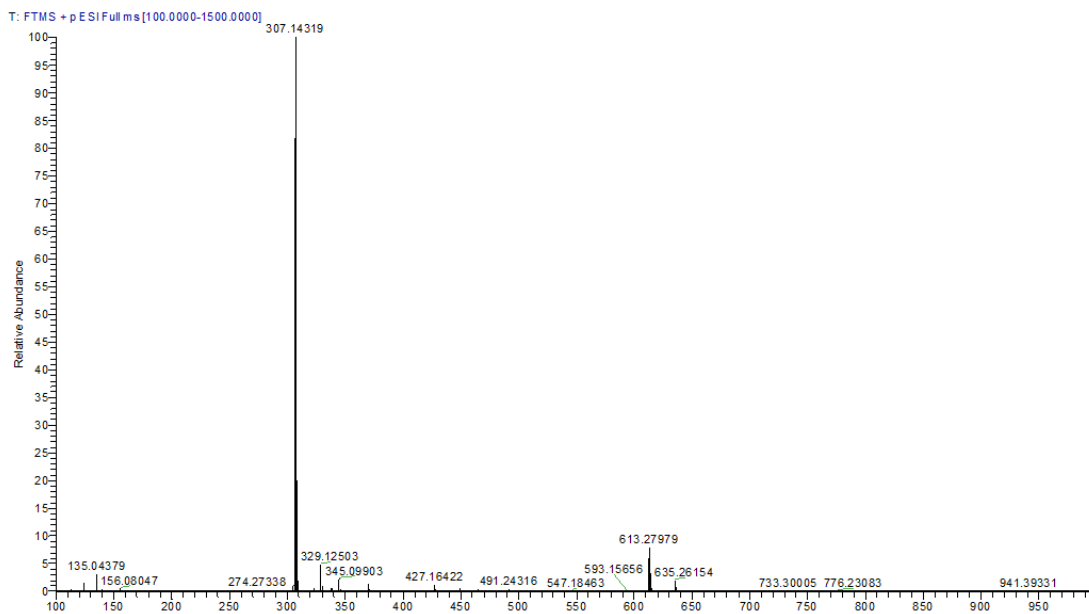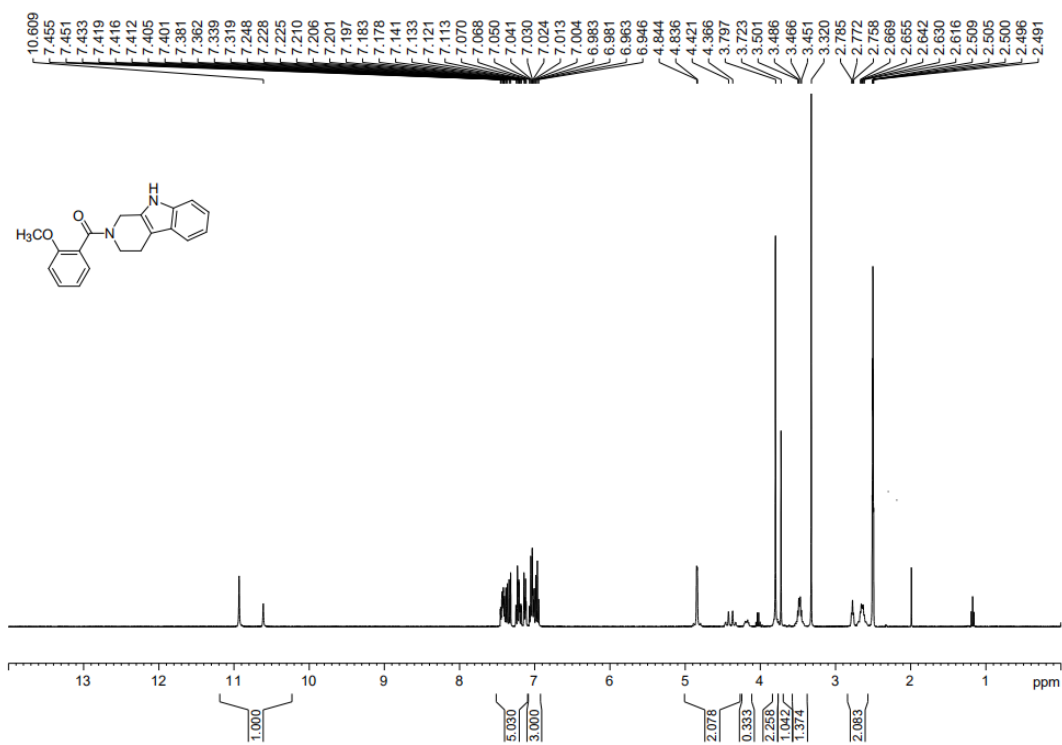

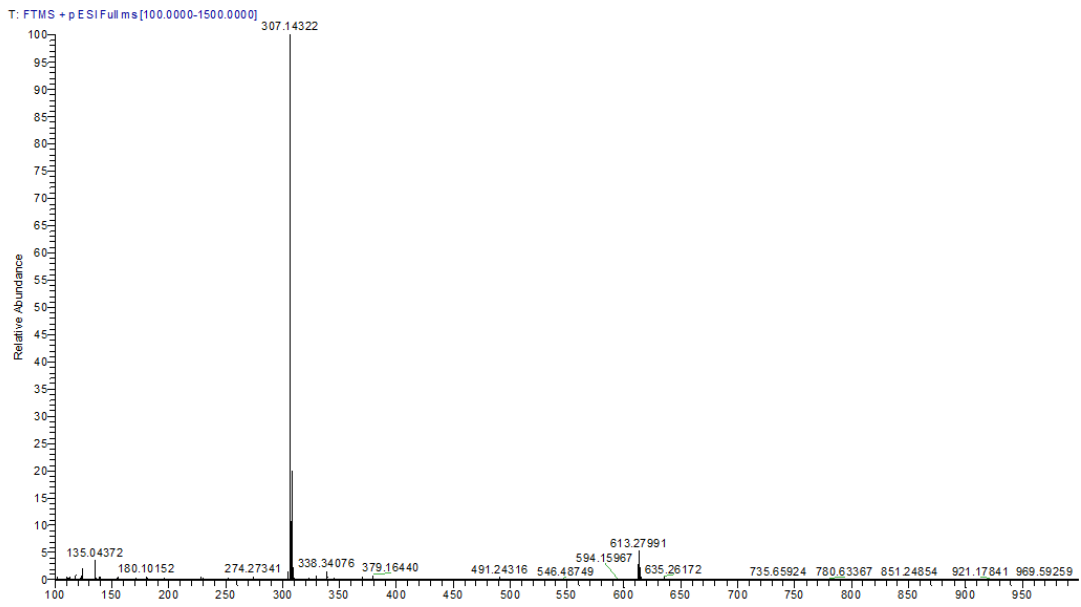

HRMS spectrum of **B5**

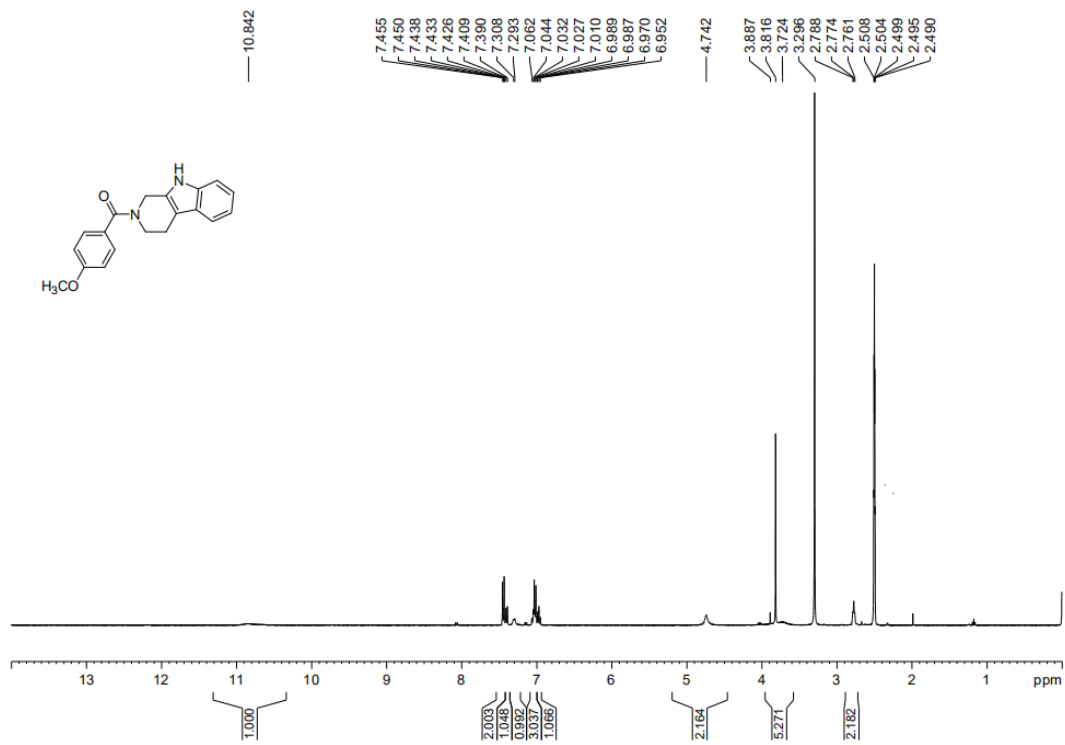

$^1\text{H}$  NMR spectrum of **B5**

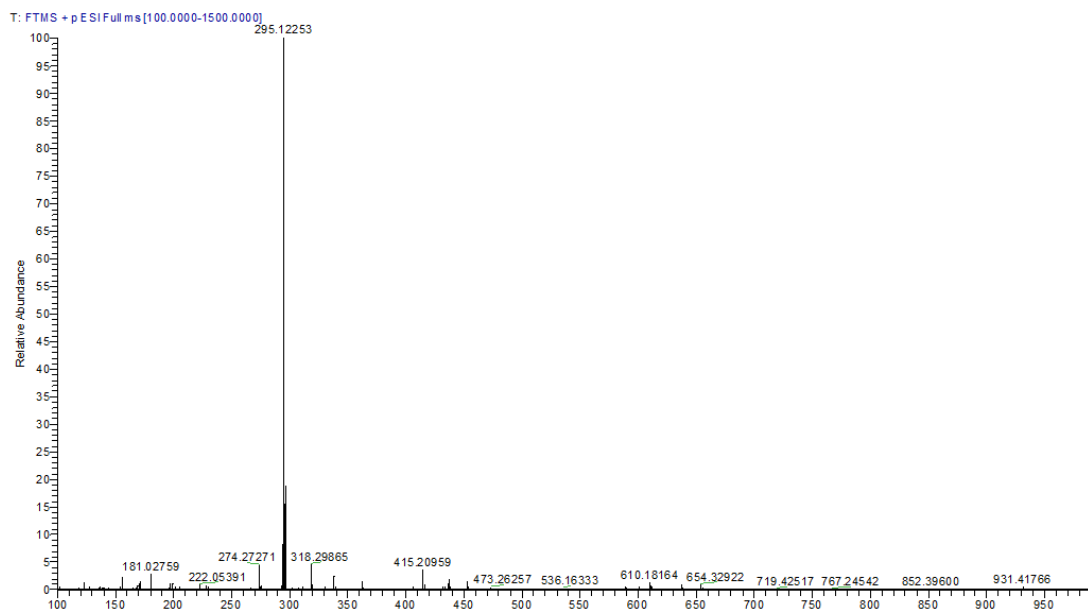

HRMS spectrum of B6

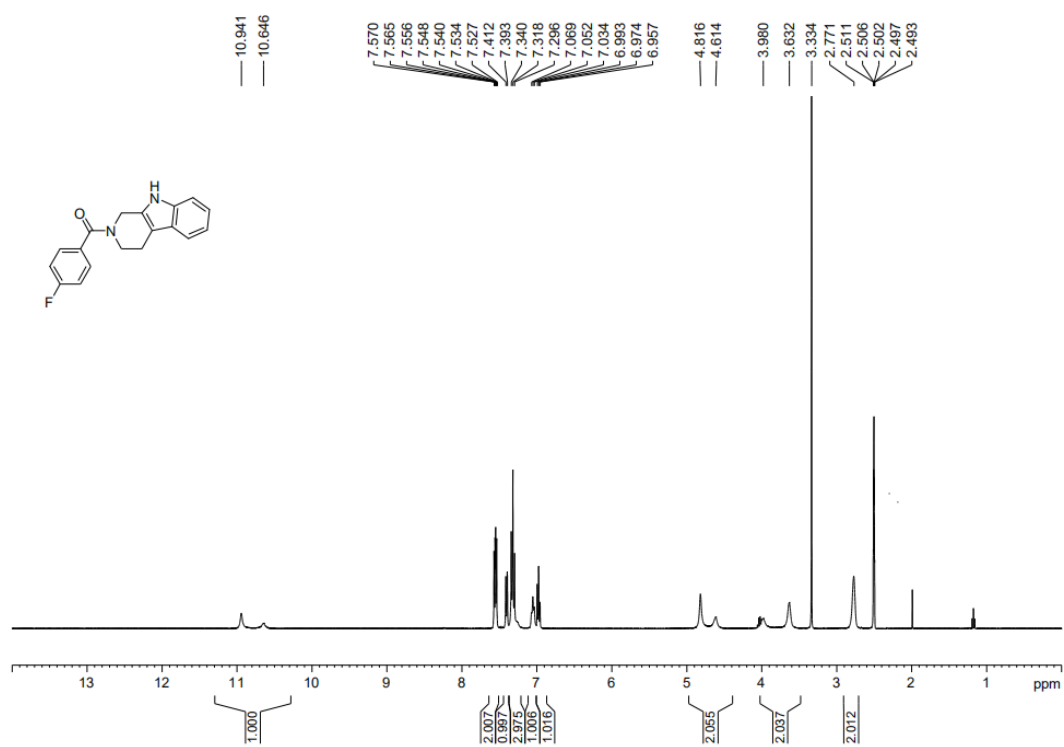

<sup>1</sup>H NMR spectrum of B6

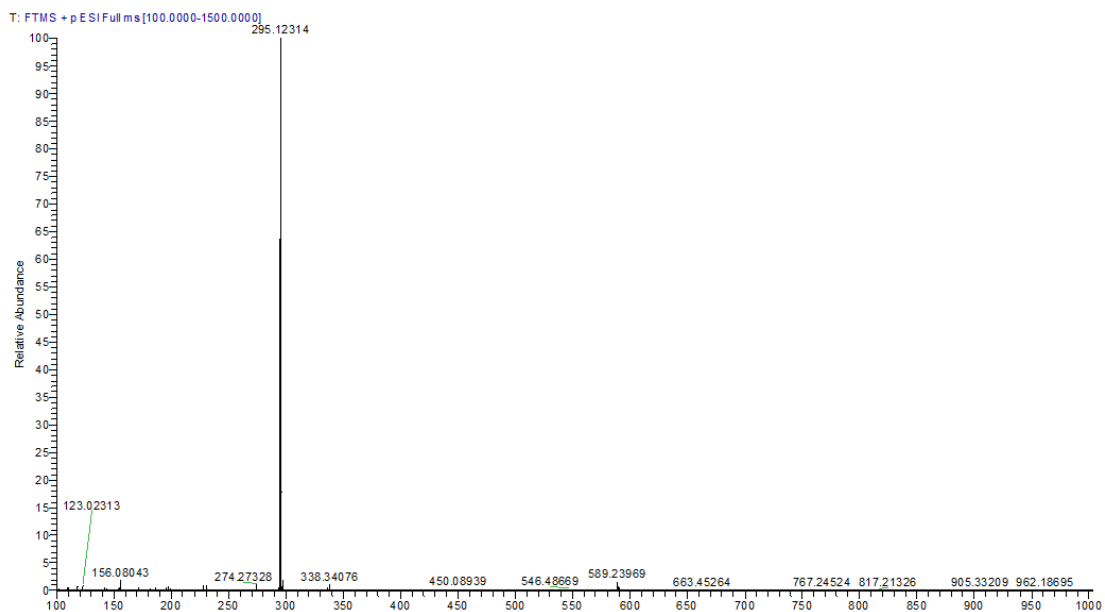

HRMS spectrum of **B7**

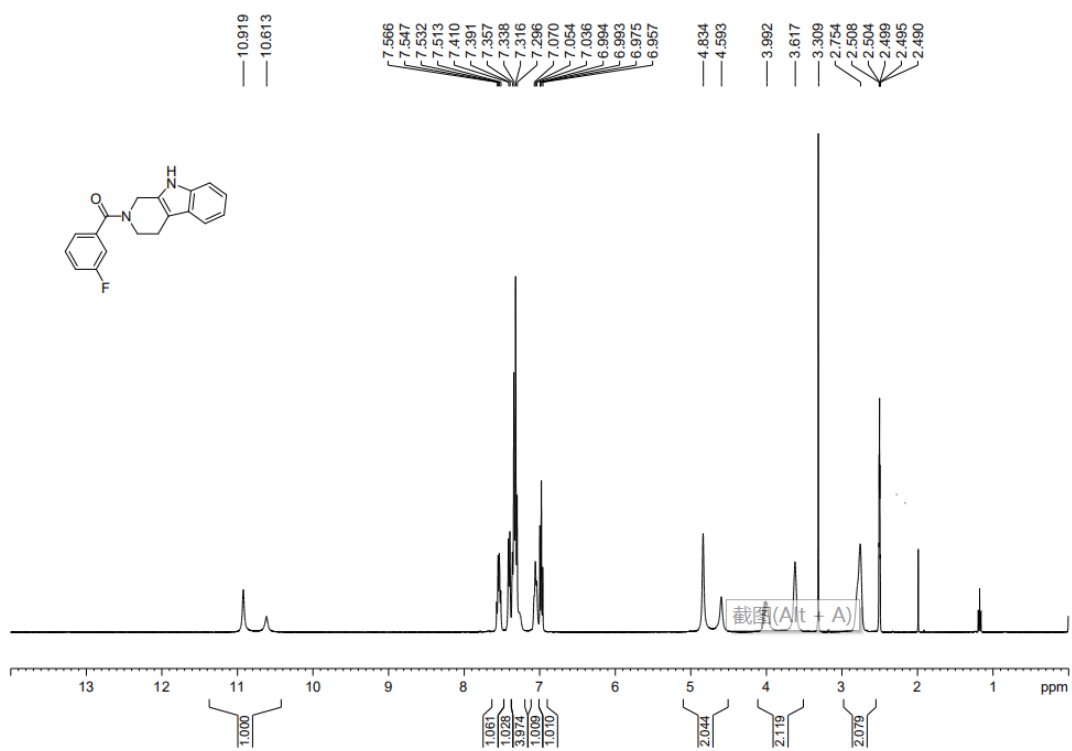

$^1\text{H}$  NMR spectrum of **B7**

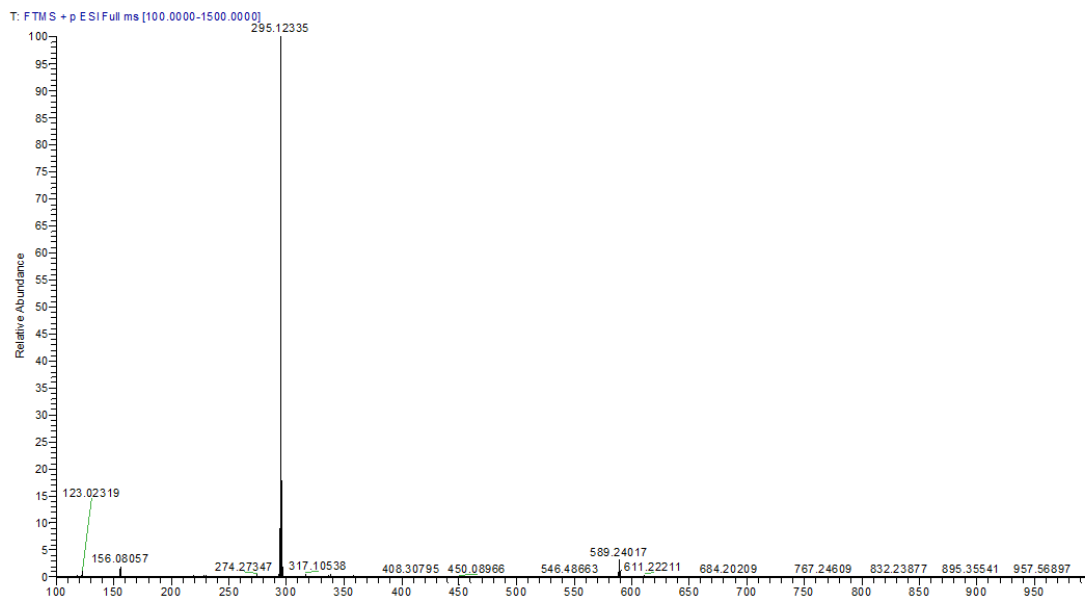

HRMS spectrum of **B8**

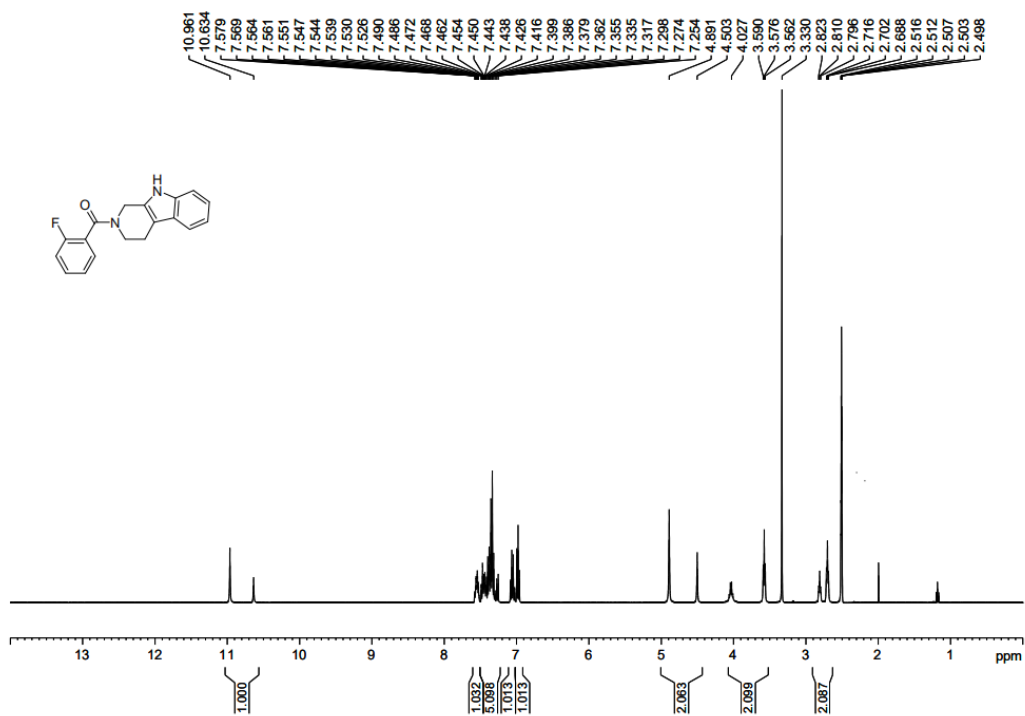

$^1\text{H}$  NMR spectrum of **B8**

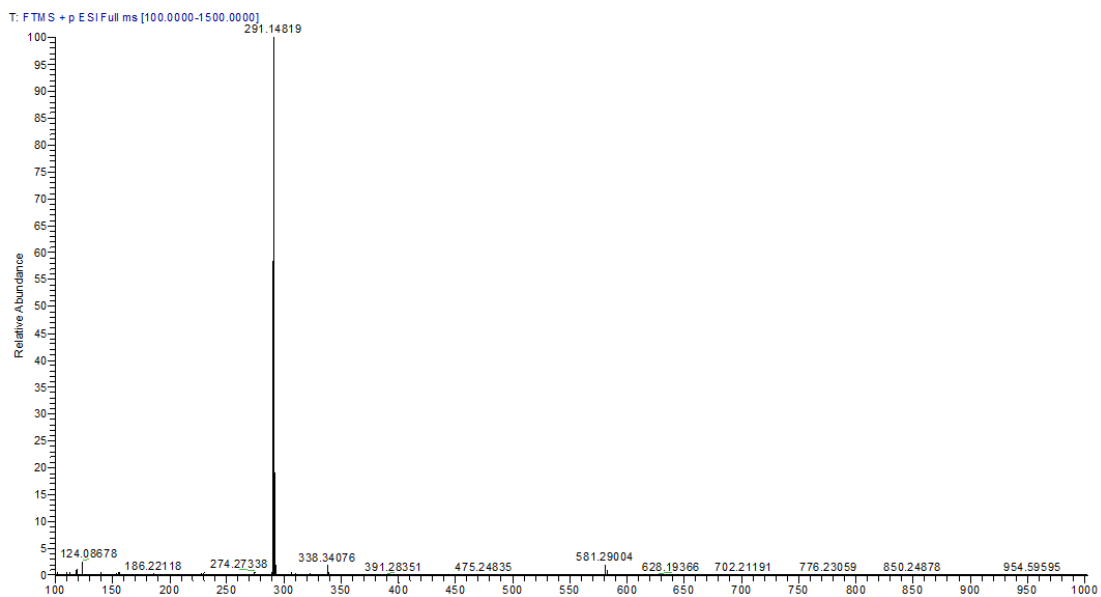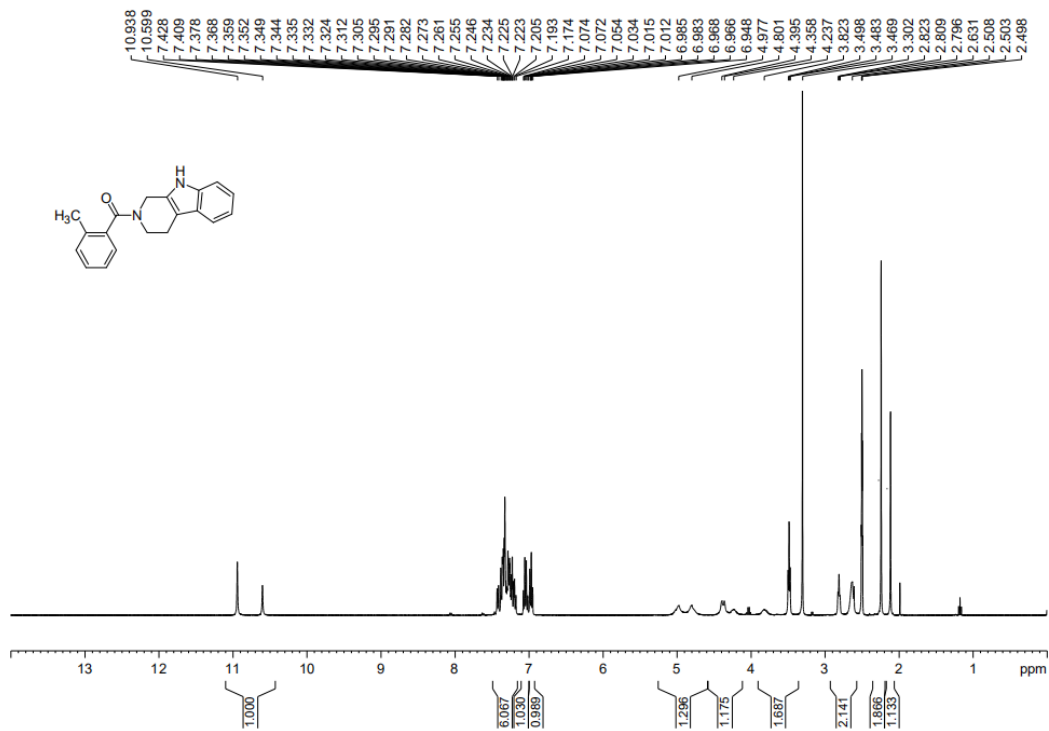

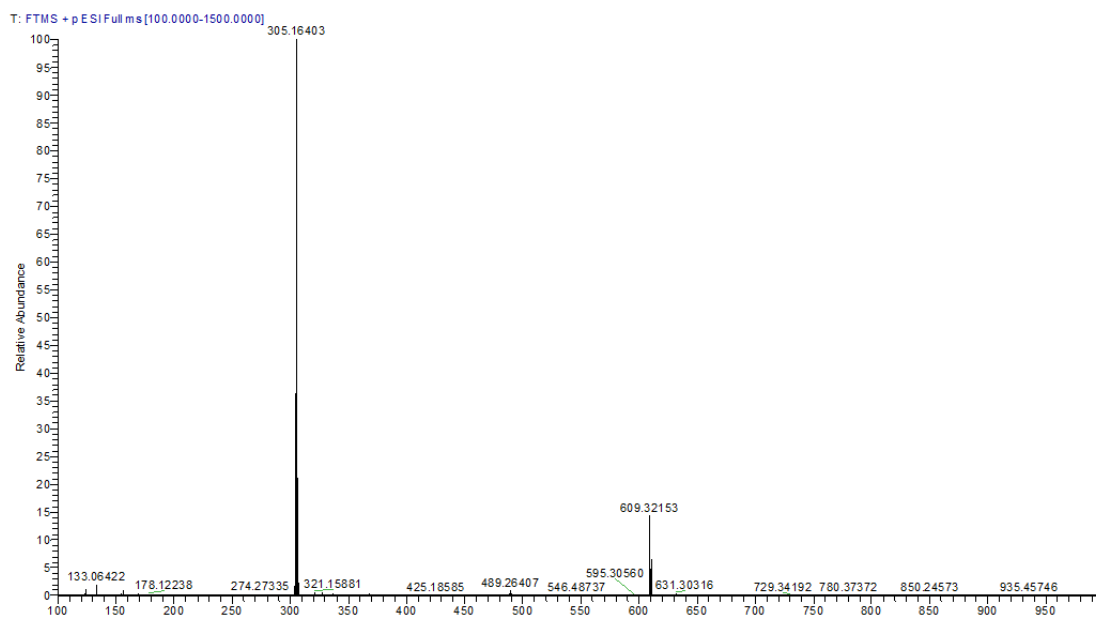

HRMS spectrum of **B10**

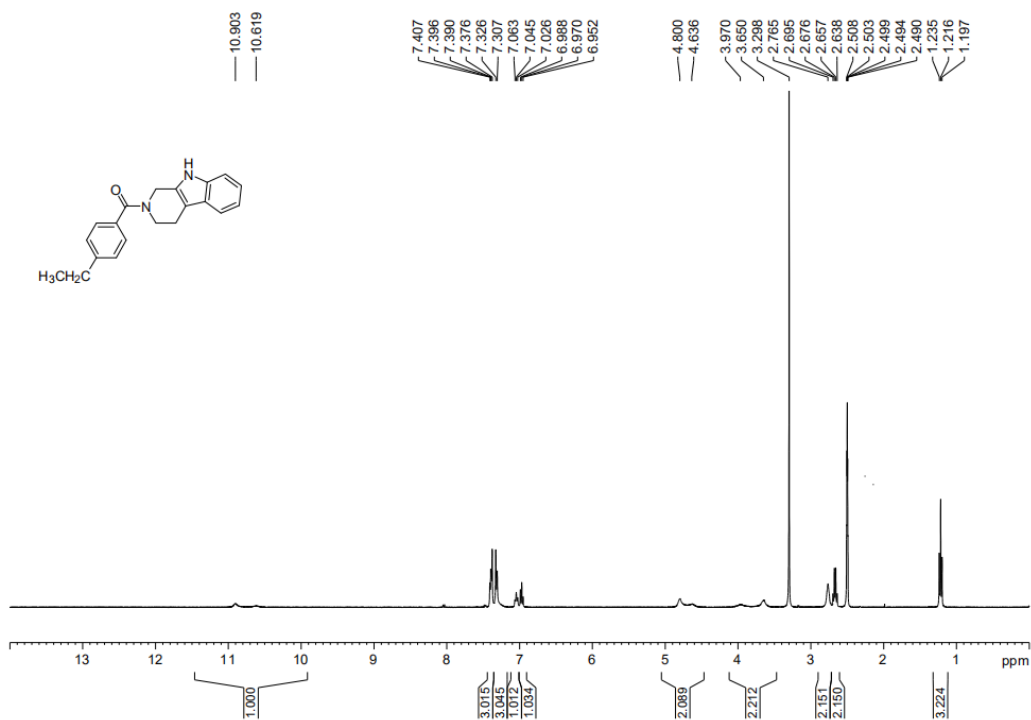

$^1\text{H}$  NMR spectrum of **B10**



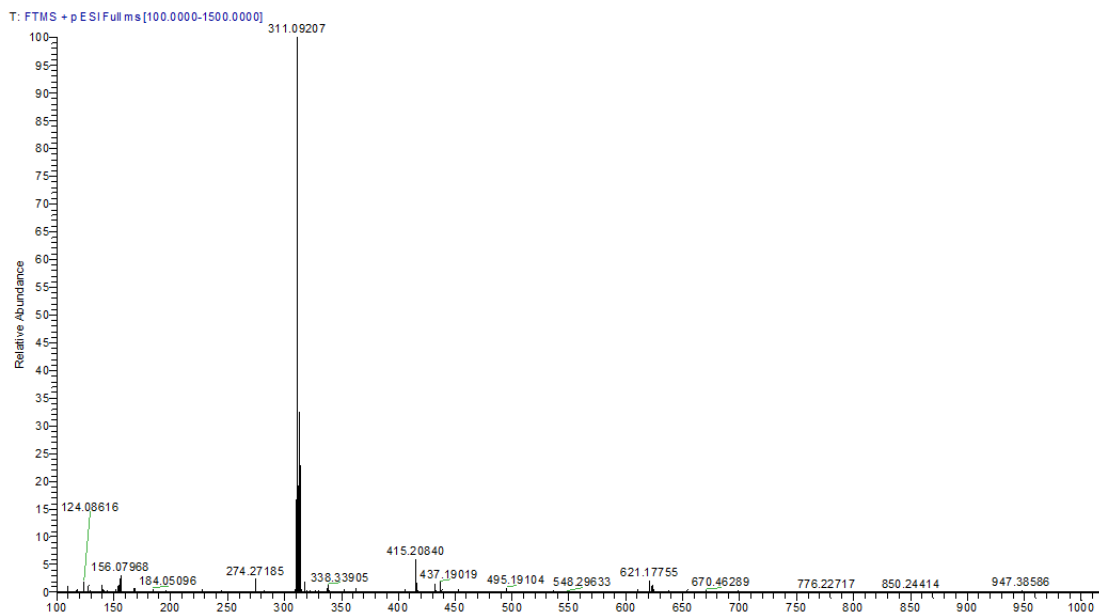

HRMS spectrum of B11

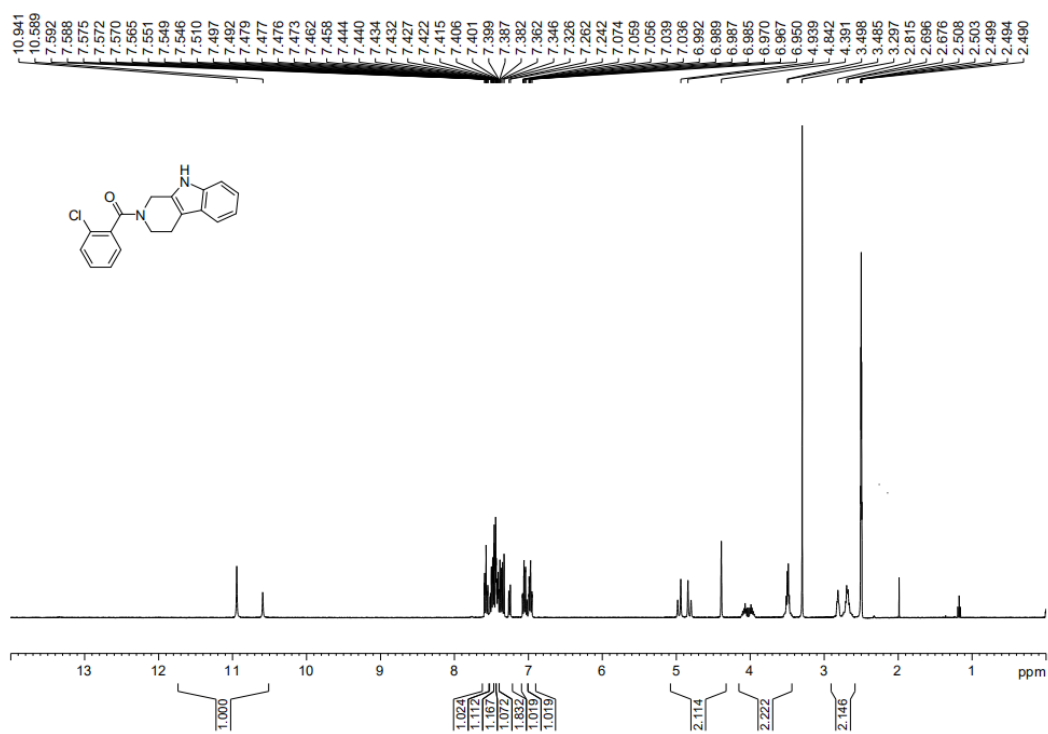

<sup>1</sup>H NMR spectrum of B11

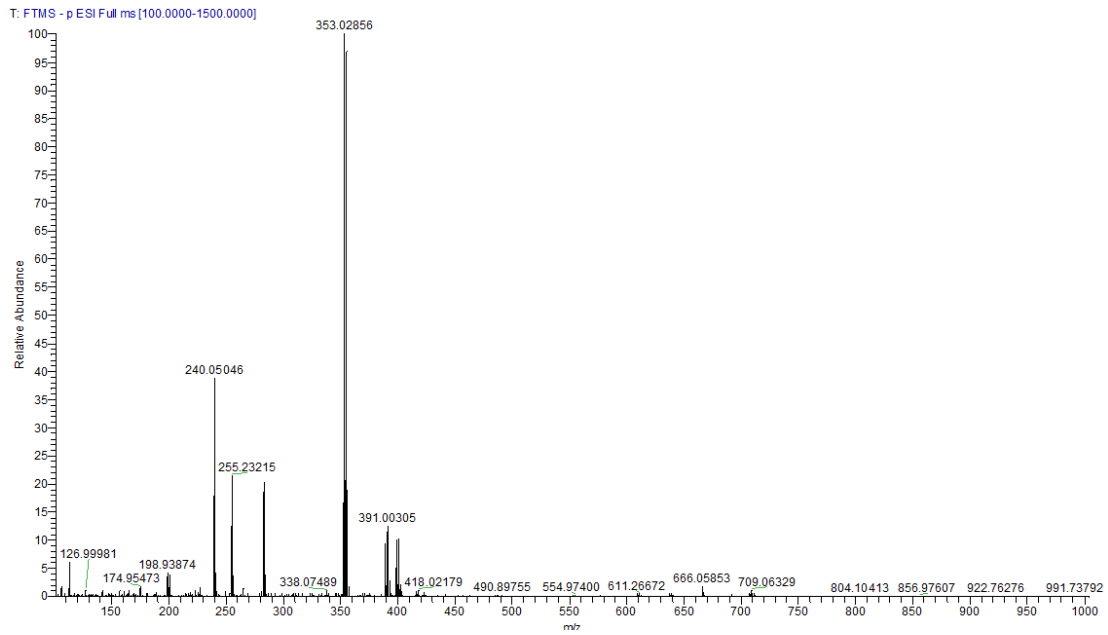

HRMS spectrum of **B12**

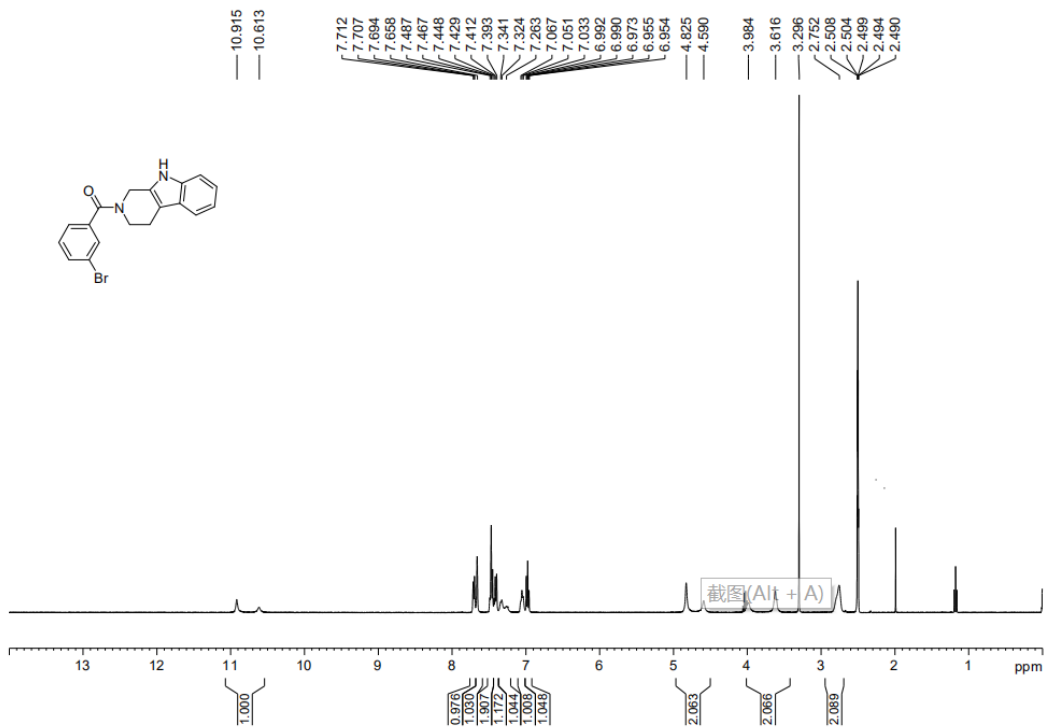

<sup>1</sup>H NMR spectrum of **B12**

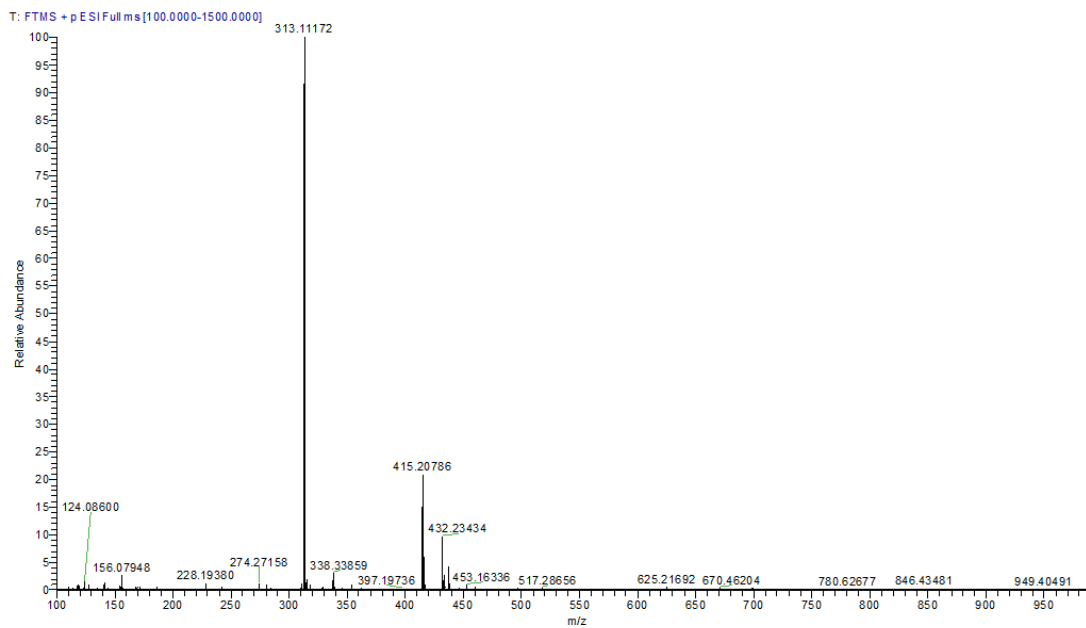

HRMS spectrum of B13

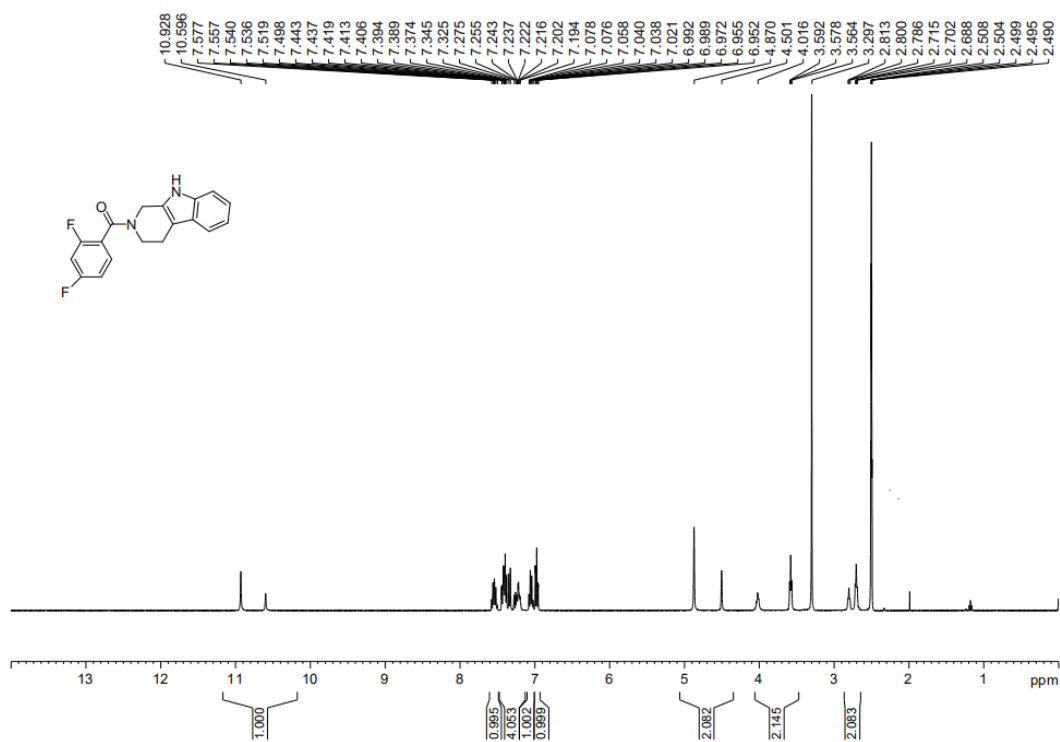

<sup>1</sup>H NMR spectrum of B13

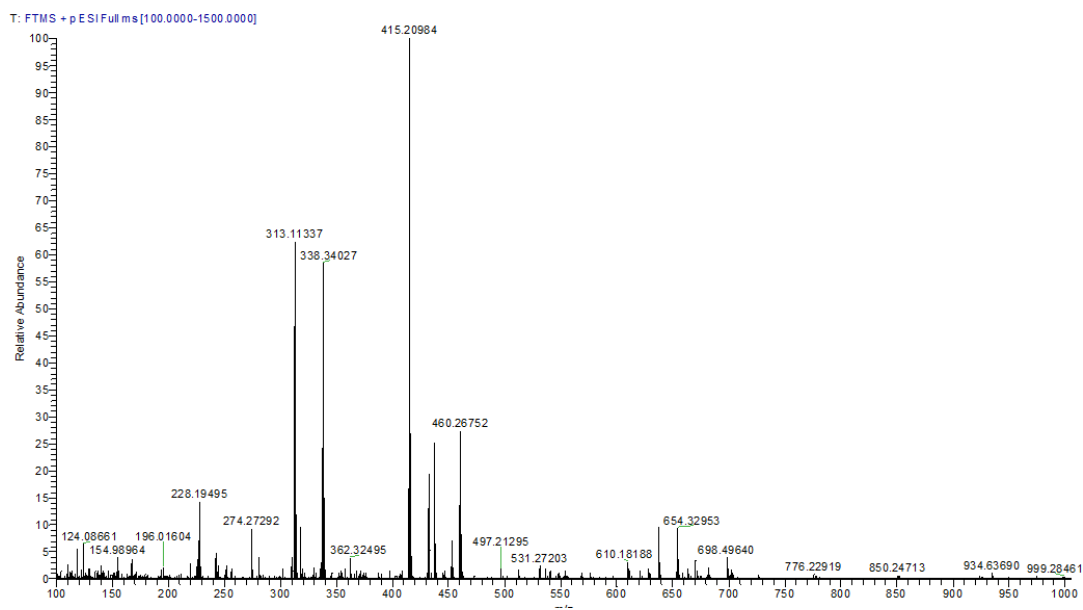

HRMS spectrum of B14

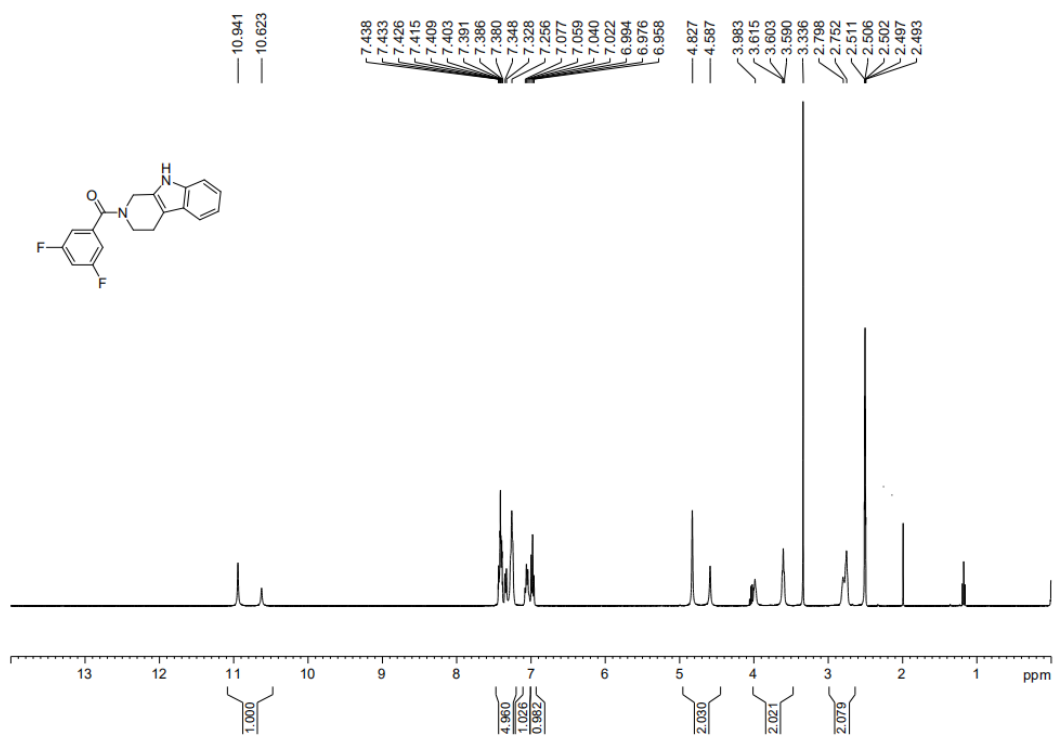

<sup>1</sup>H NMR spectrum of B14

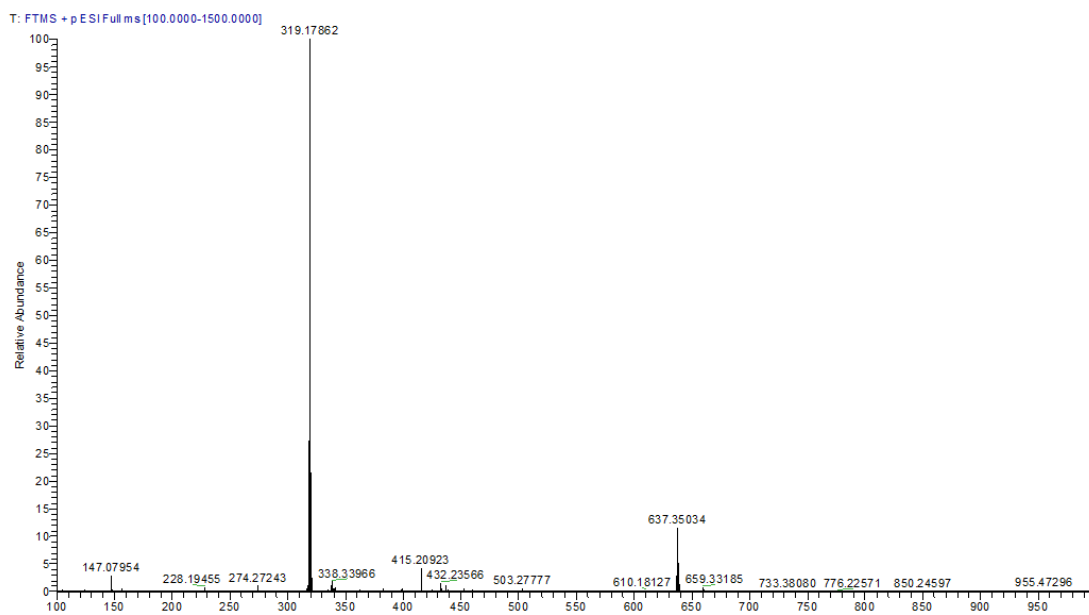

HRMS spectrum of **B15**

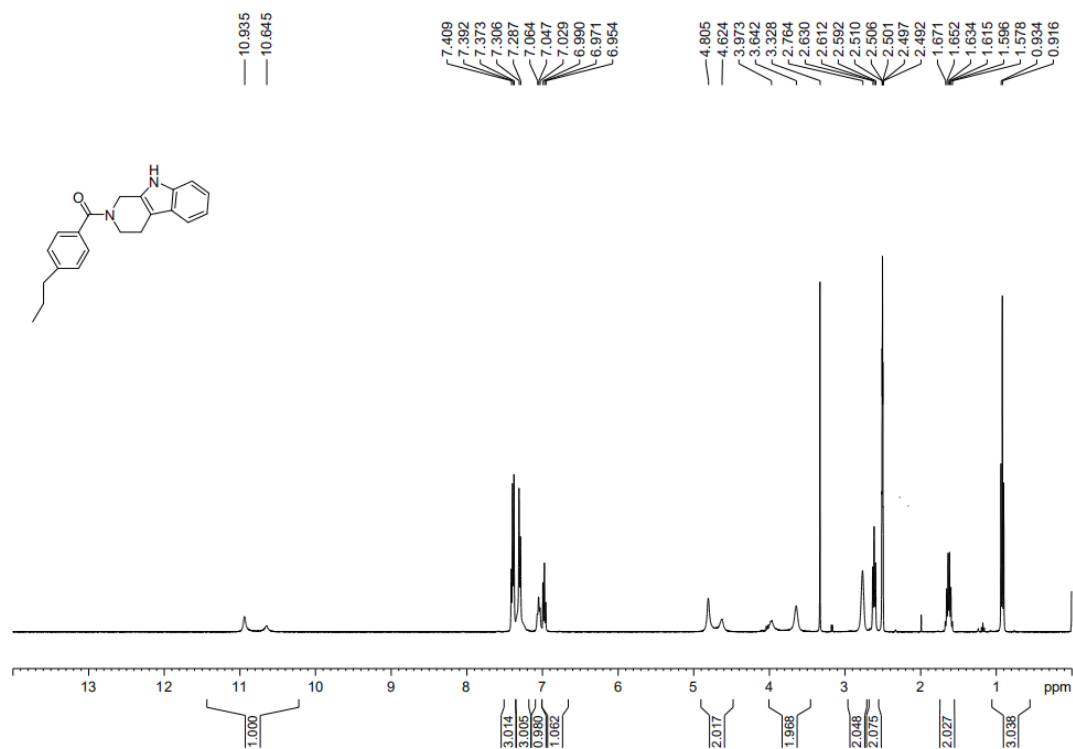

$^1\text{H}$  NMR spectrum of **B15**

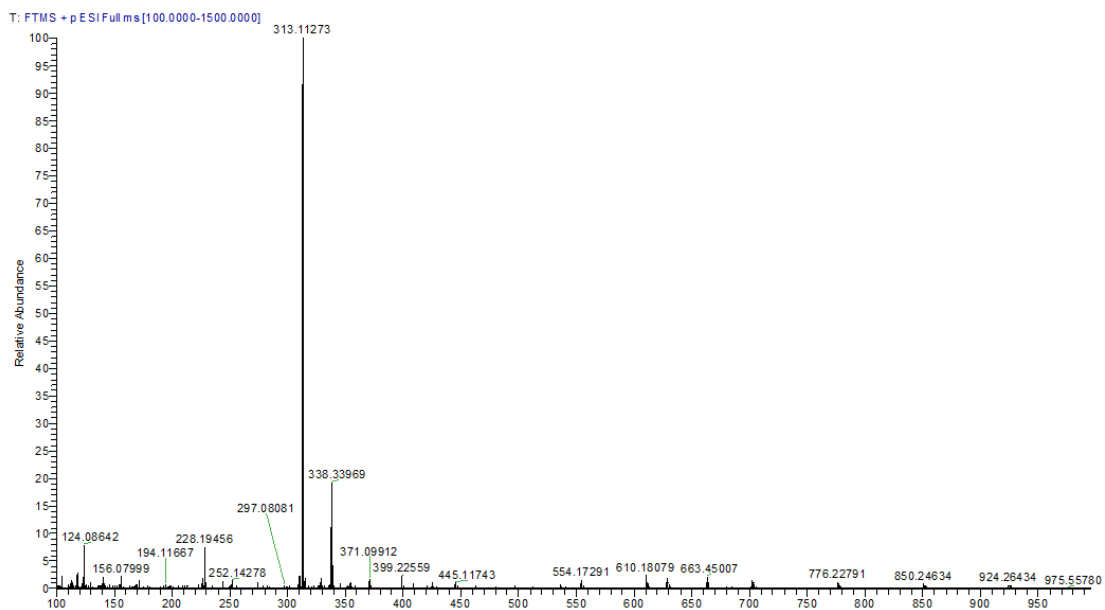

HRMS spectrum of B16

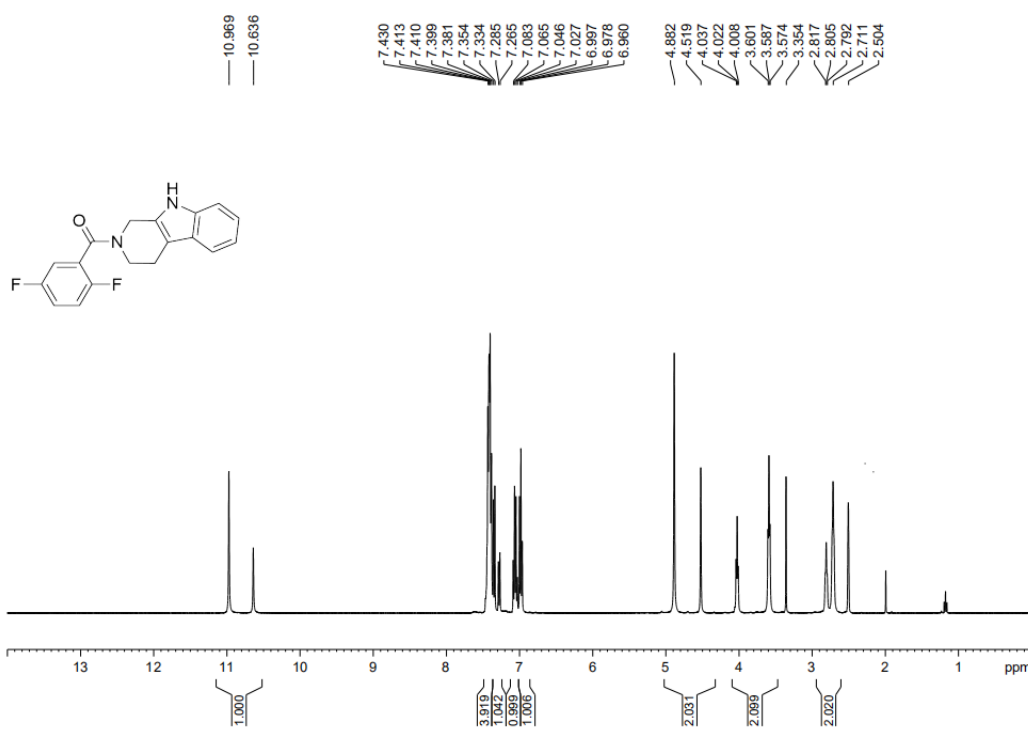

<sup>1</sup>H NMR spectrum of B16

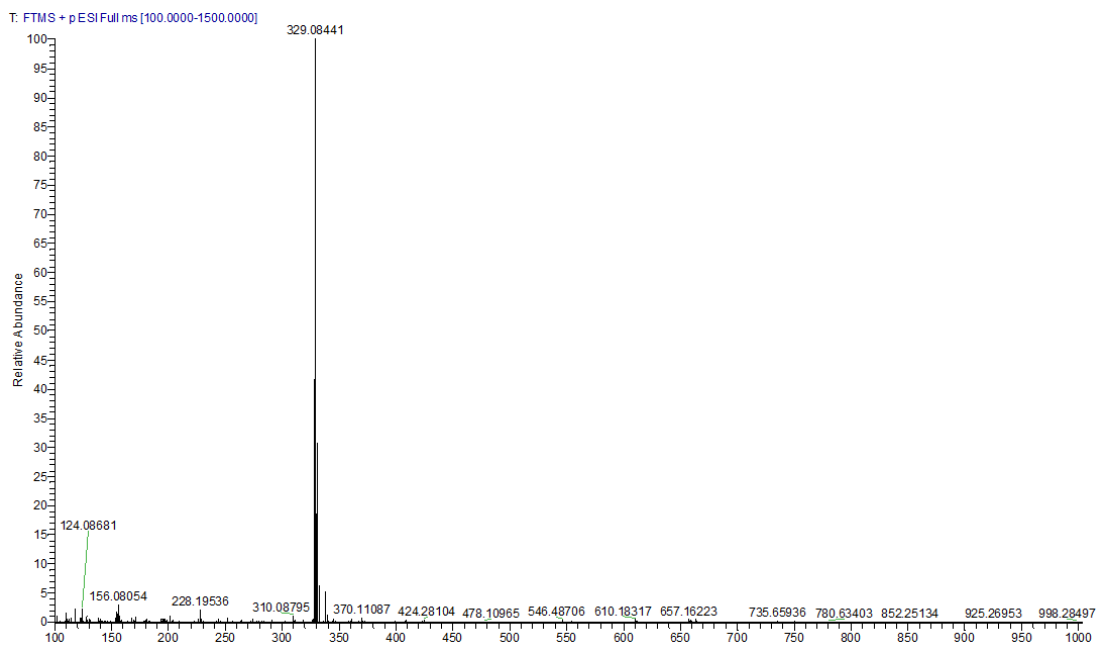

HRMS spectrum of **B17**

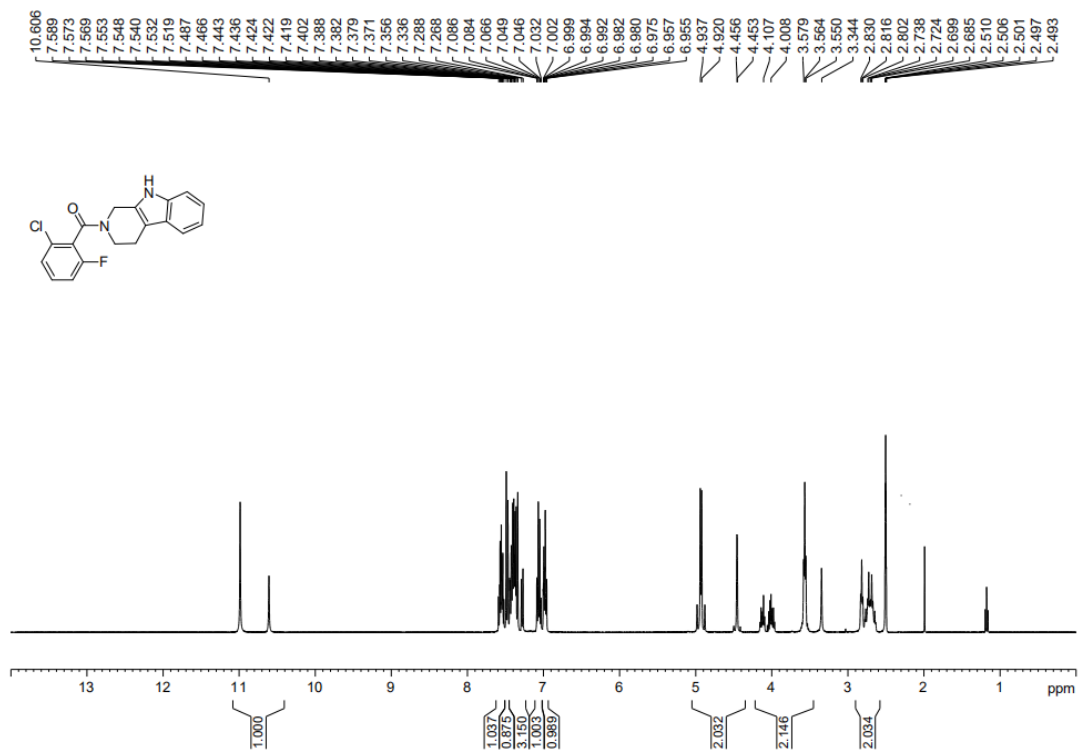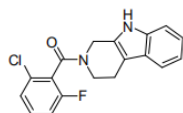

$^1\text{H}$  NMR spectrum of **B17**

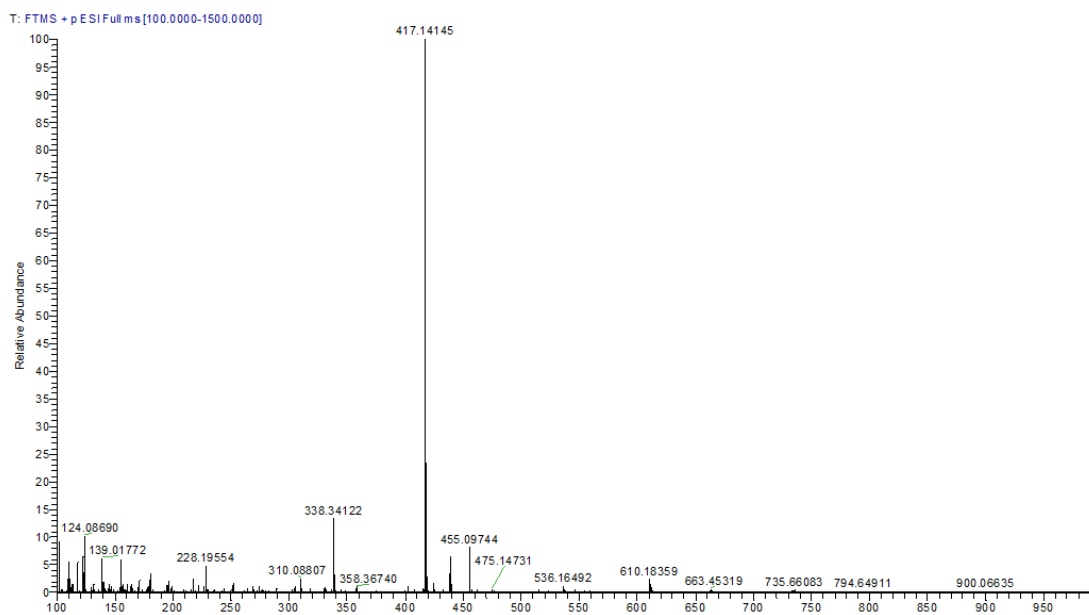

HRMS spectrum of C1

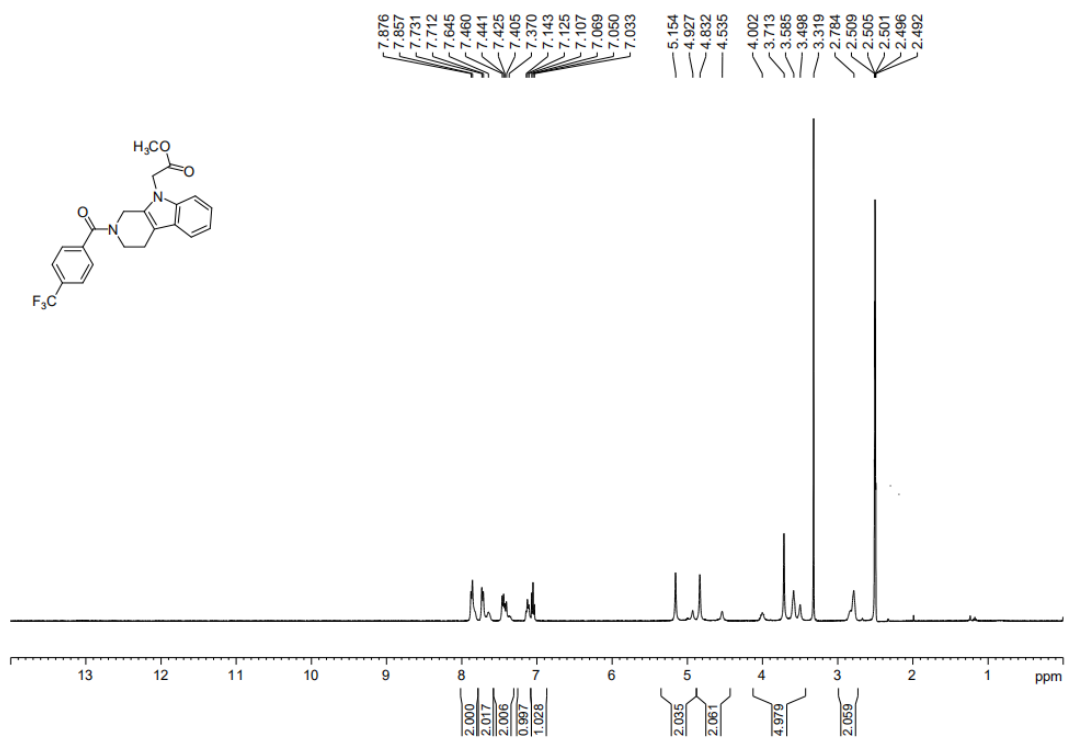

<sup>1</sup>H NMR spectrum of C1



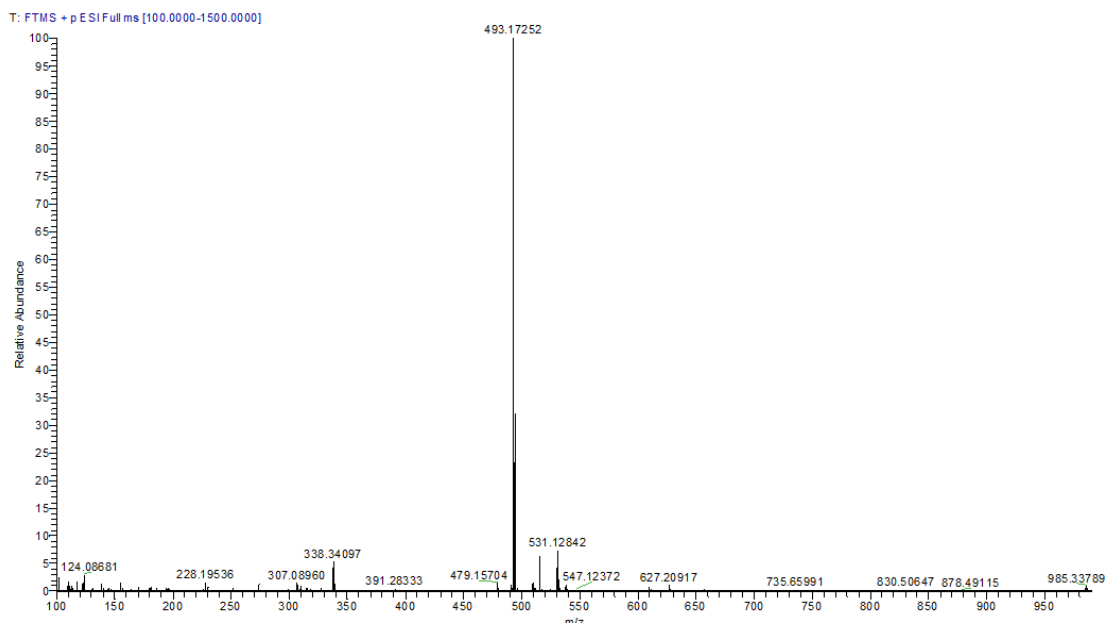

HRMS spectrum of C2

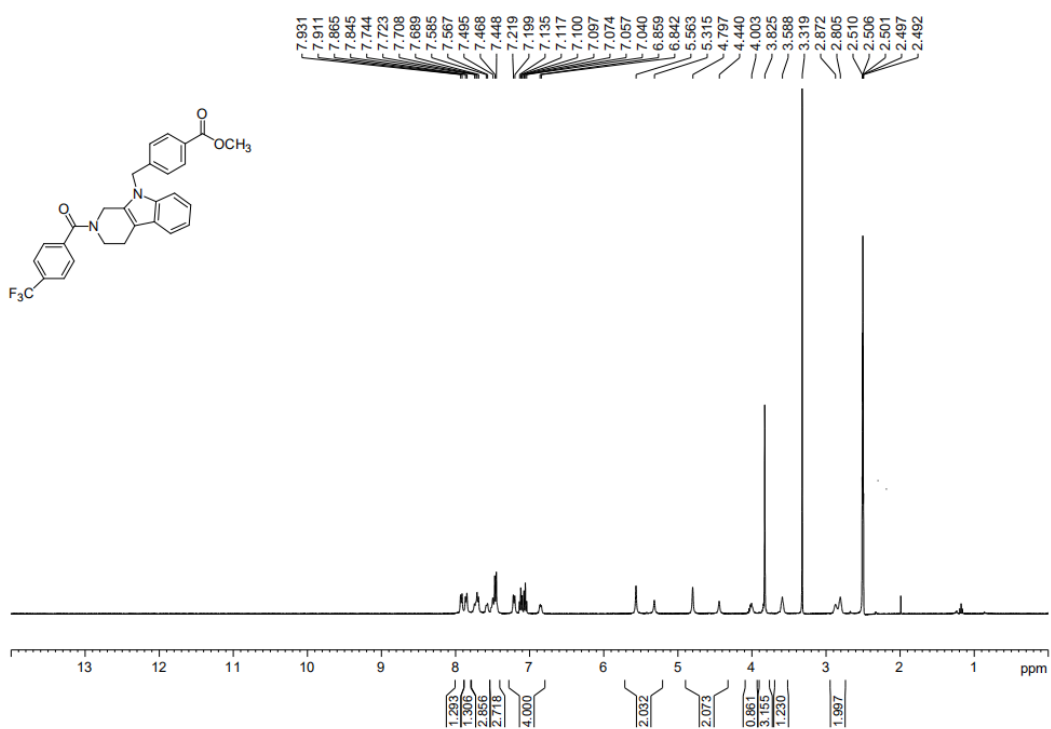

<sup>1</sup>H NMR spectrum of C2

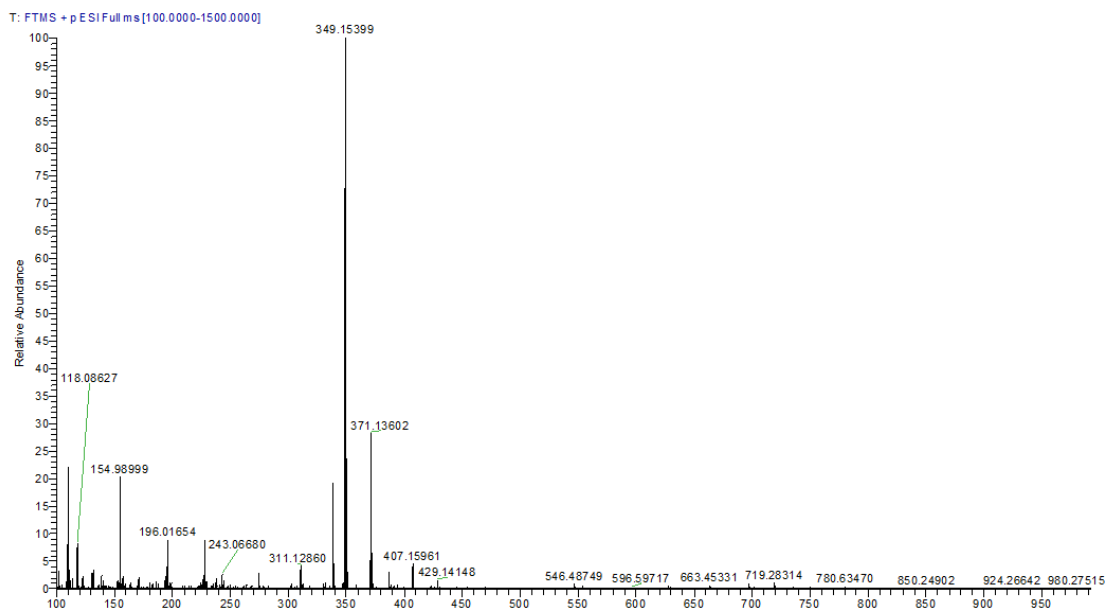

HRMS spectrum of C3

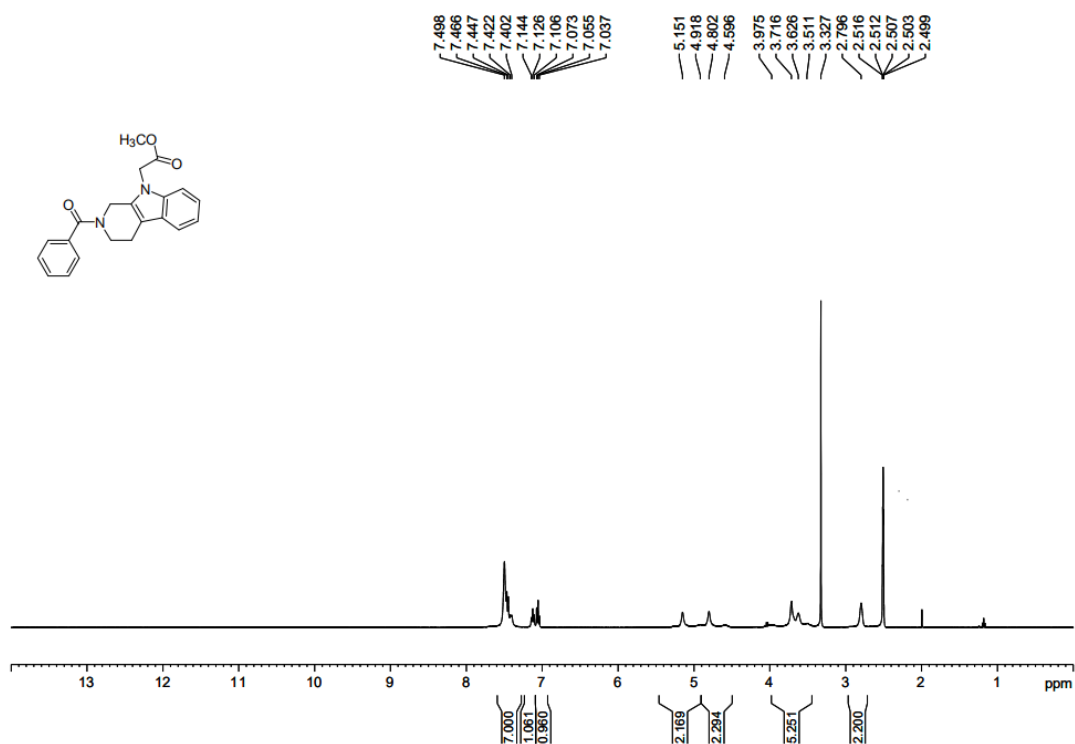

<sup>1</sup>H NMR spectrum of C3

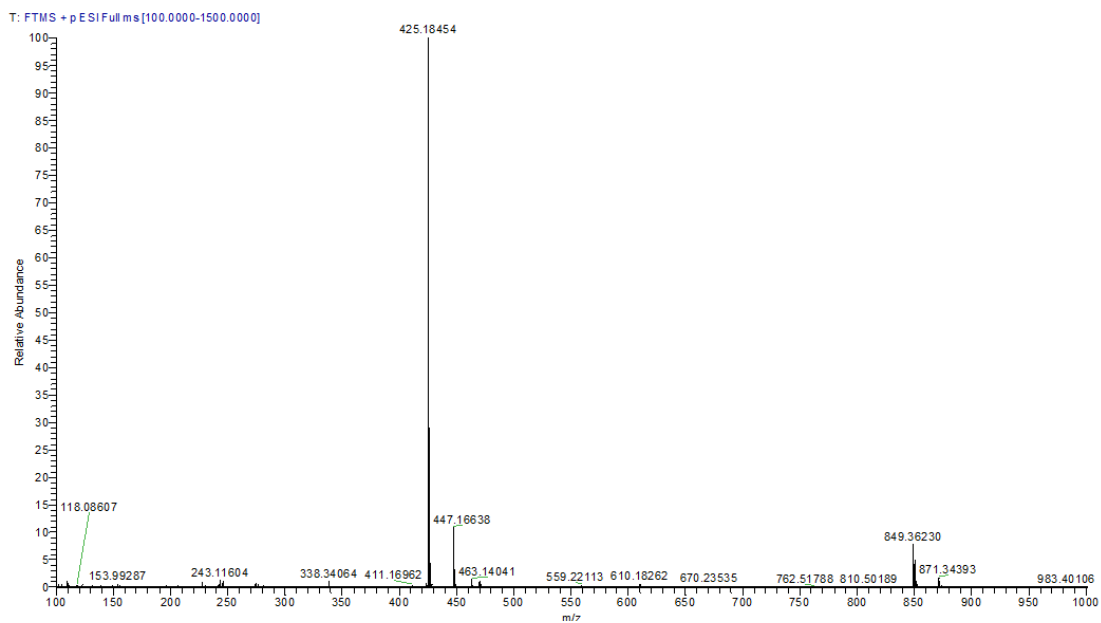

HRMS spectrum of C4

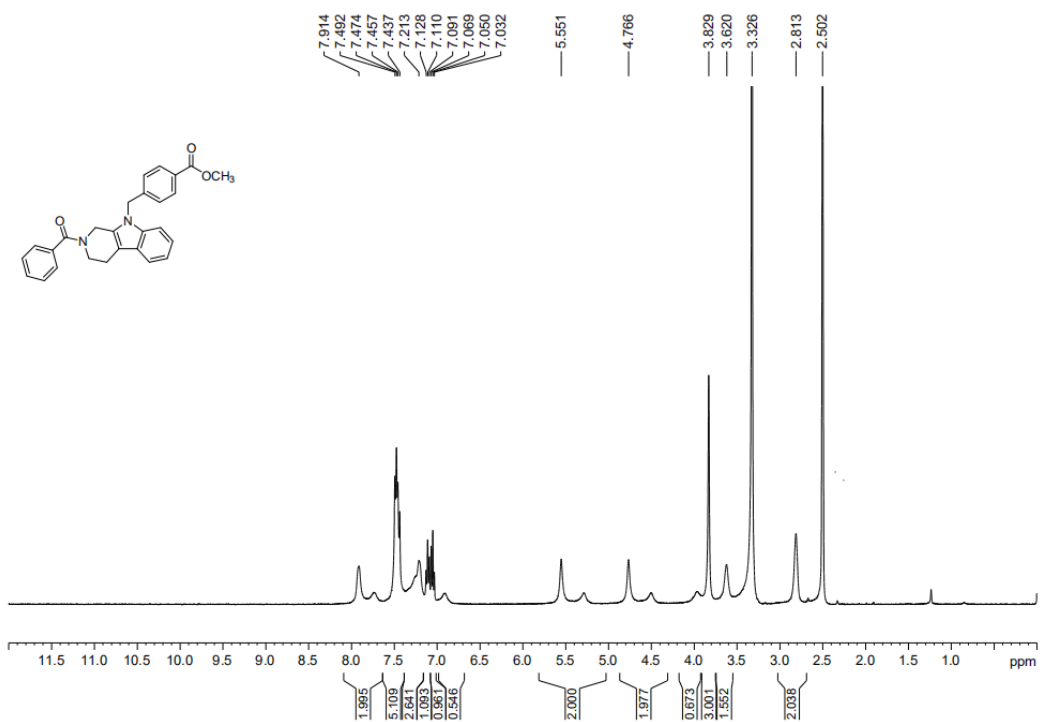

<sup>1</sup>H NMR spectrum of C4

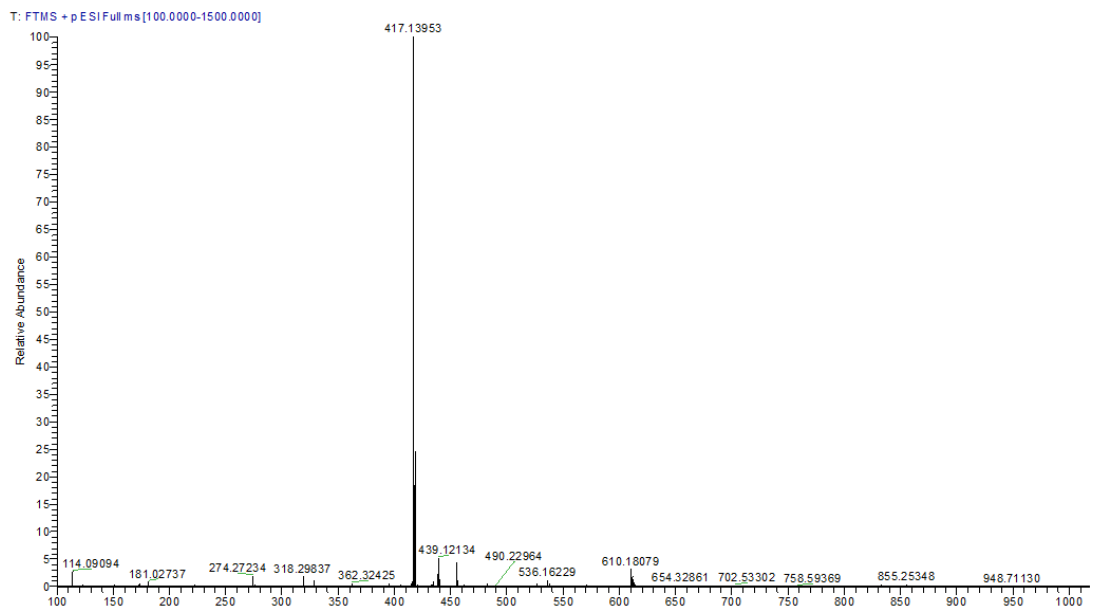

HRMS spectrum of C5

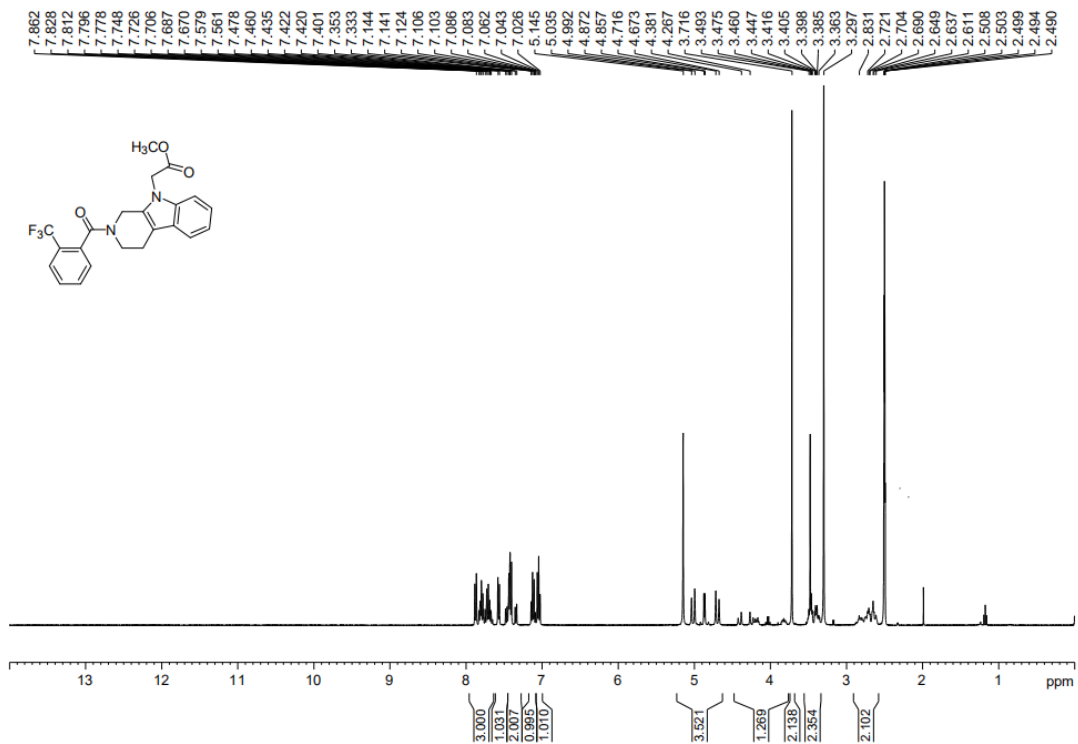

<sup>1</sup>H NMR spectrum of C5

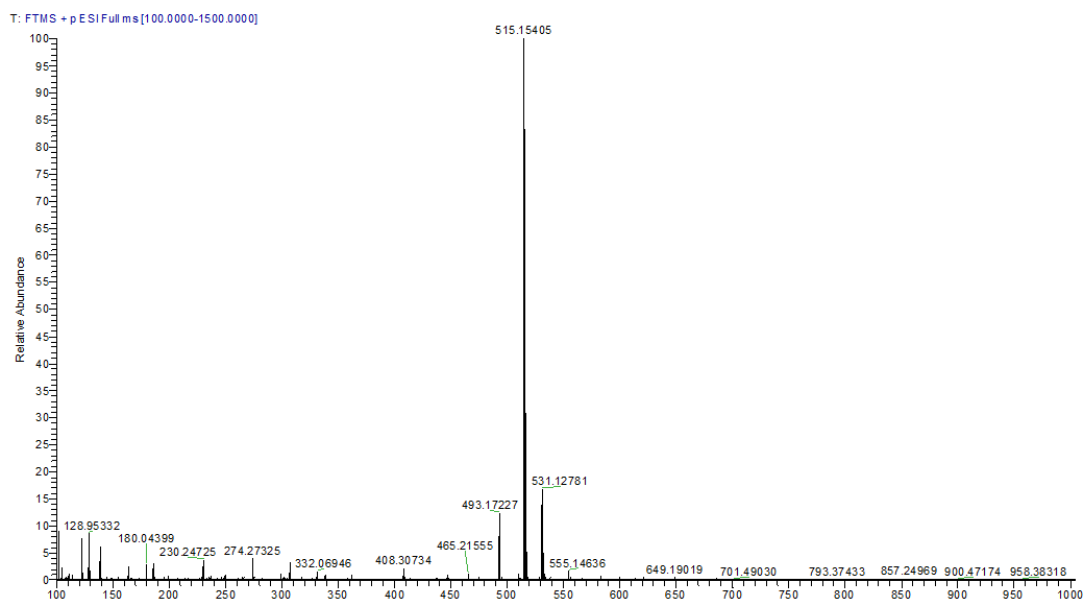

HRMS NMR spectrum of C6

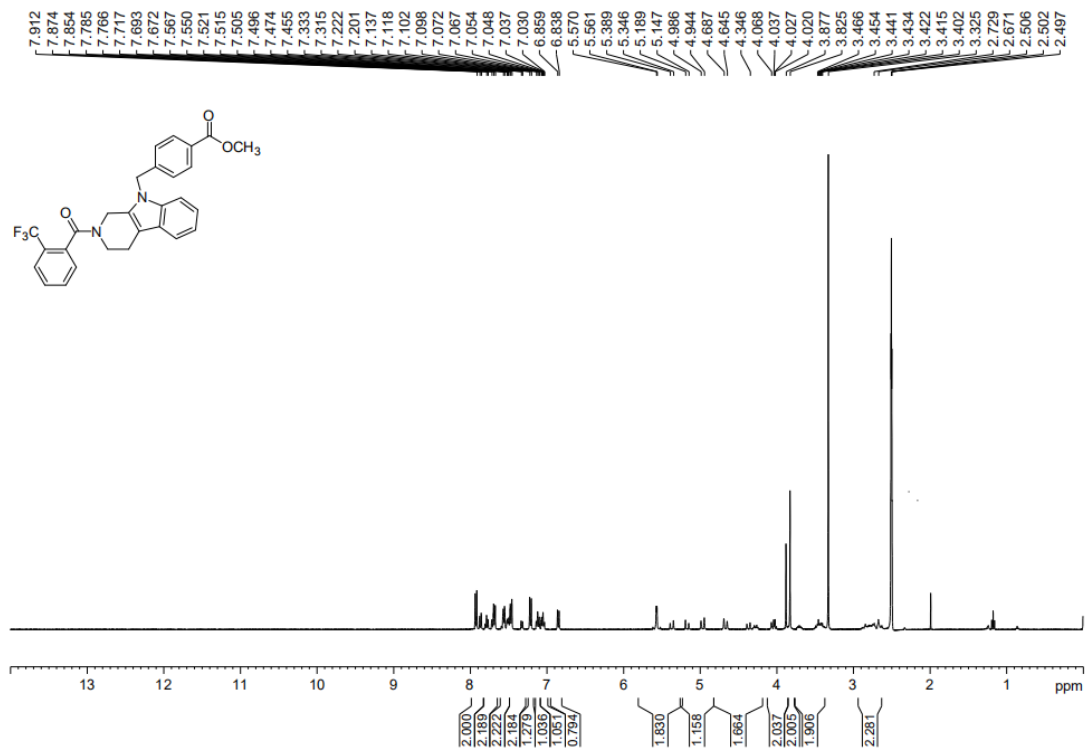

<sup>1</sup>H NMR spectrum of C6

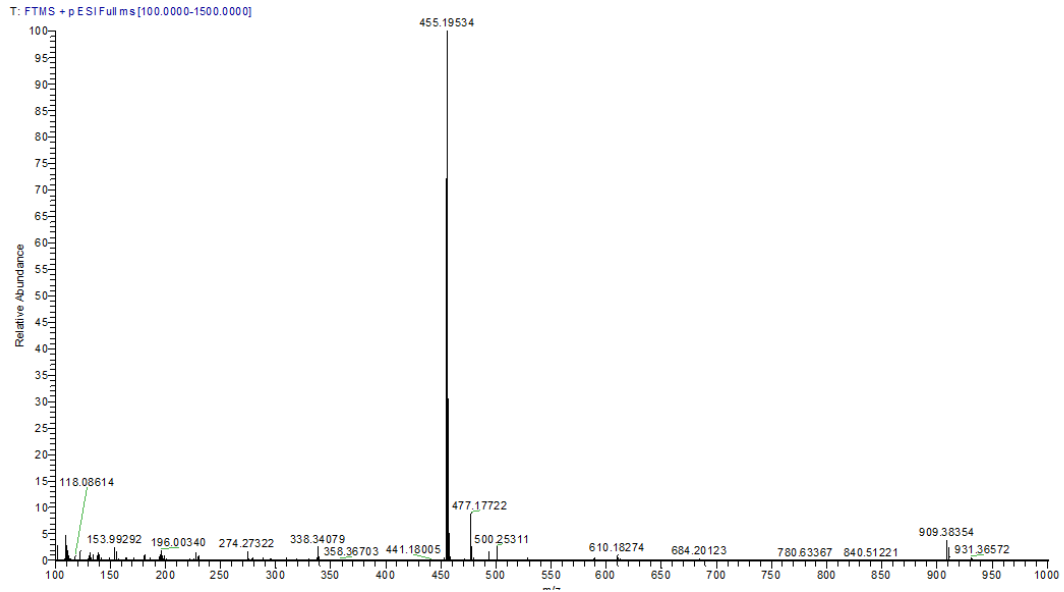

HRMS spectrum of C7

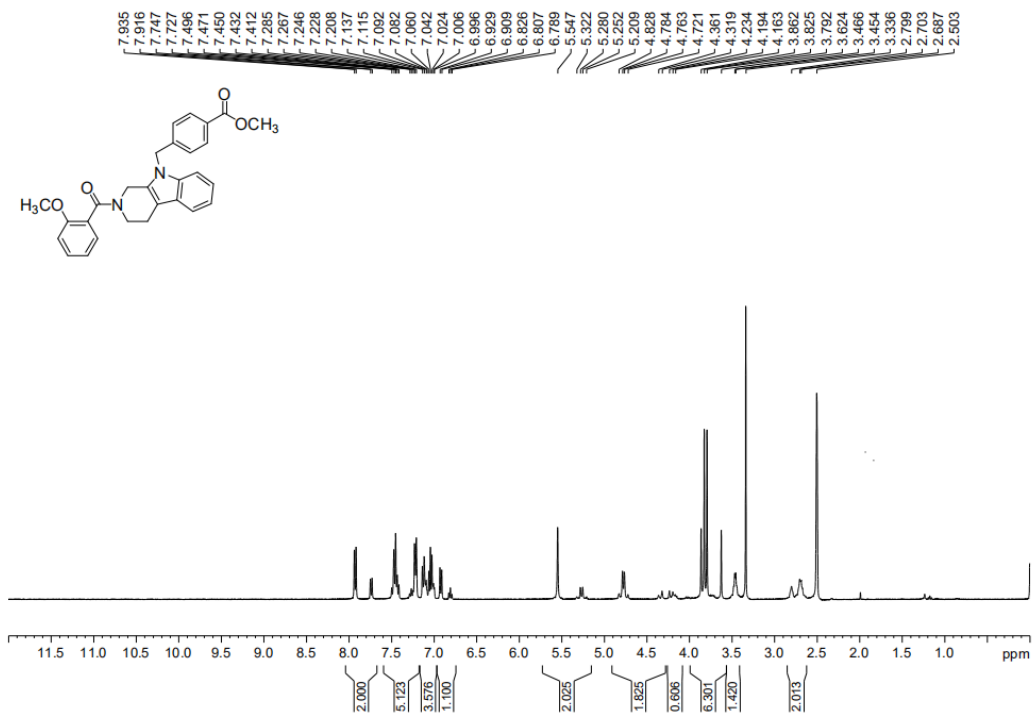

<sup>1</sup>H NMR spectrum of C7

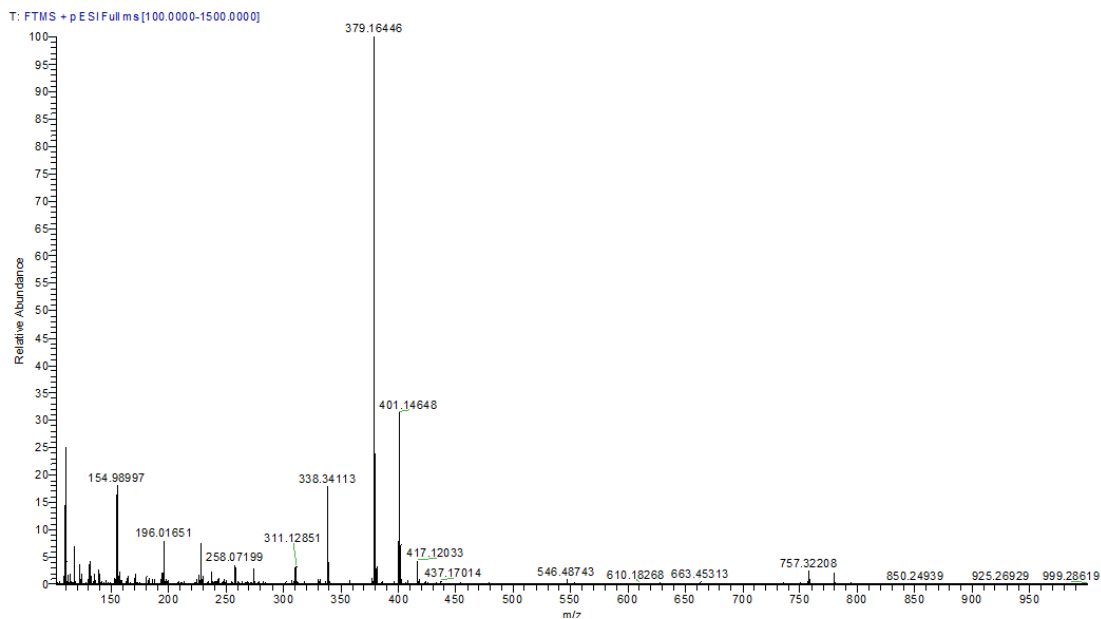

HRMS spectrum of C8

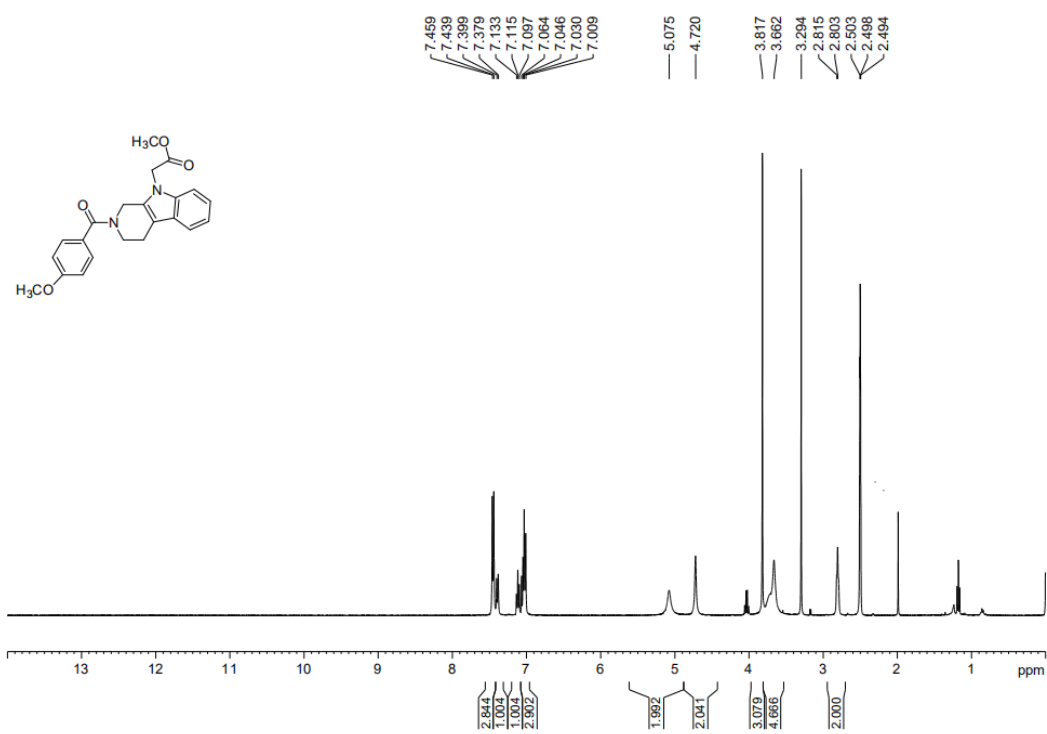

<sup>1</sup>H NMR spectrum of C8

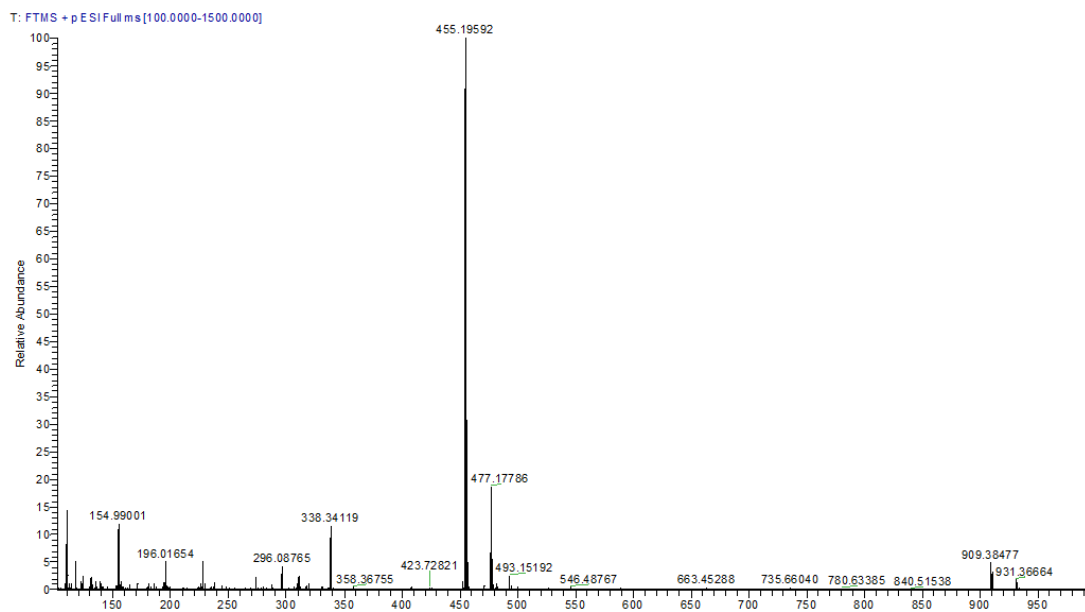

HRMS spectrum of C9

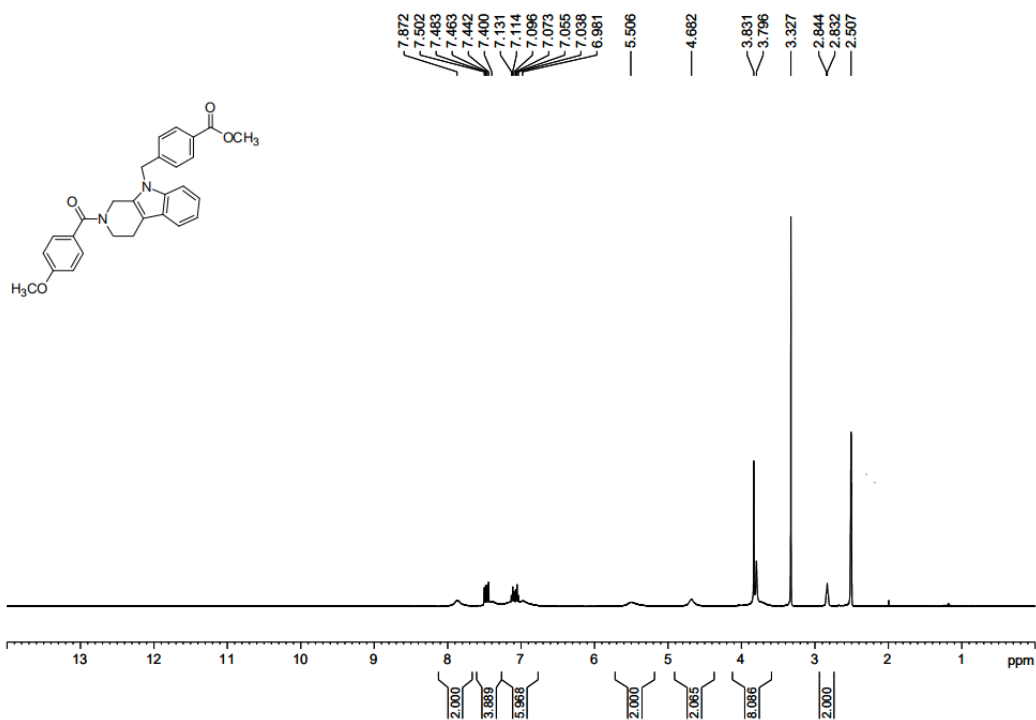

<sup>1</sup>H NMR spectrum of C9



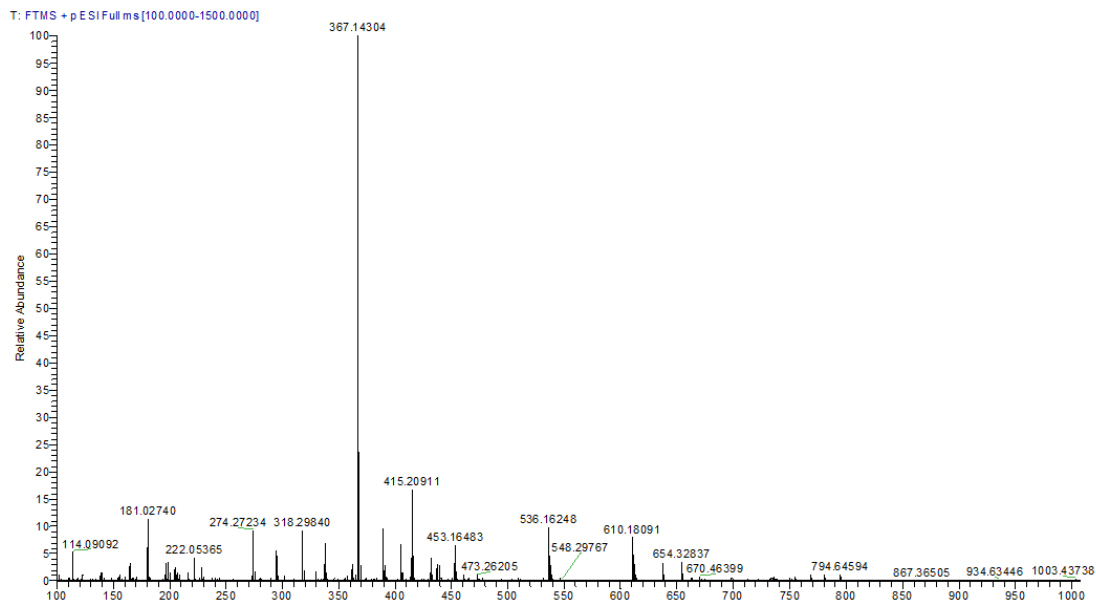

HRMS spectrum of C10

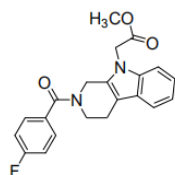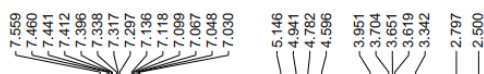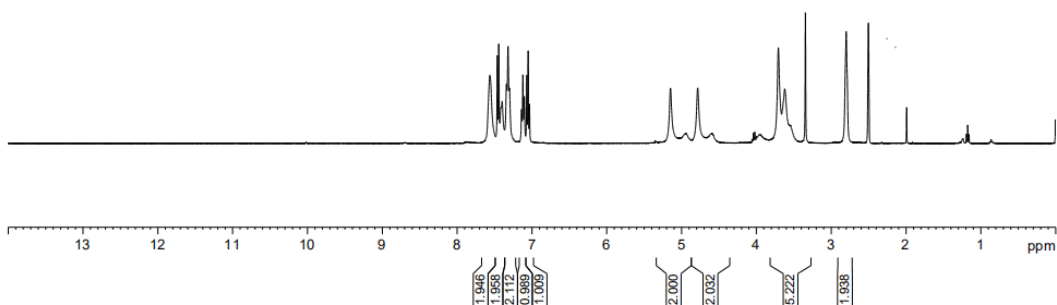

<sup>1</sup>H NMR spectrum of C10

T: FTMS + pESI Full ms [100.0000-1500.0000]

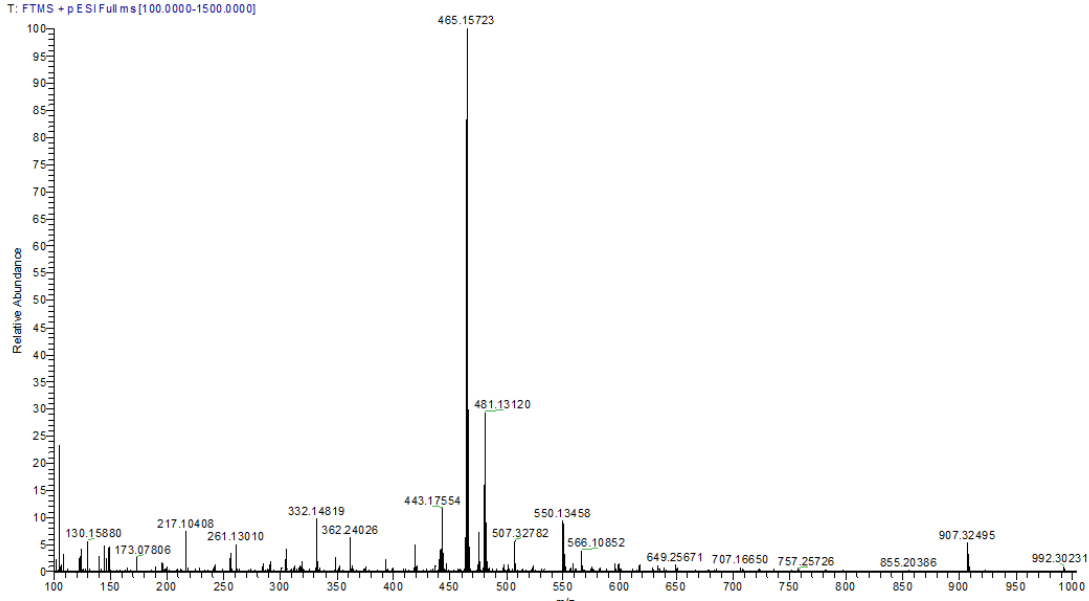

HRMS spectrum of C11

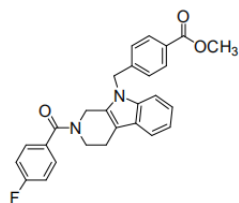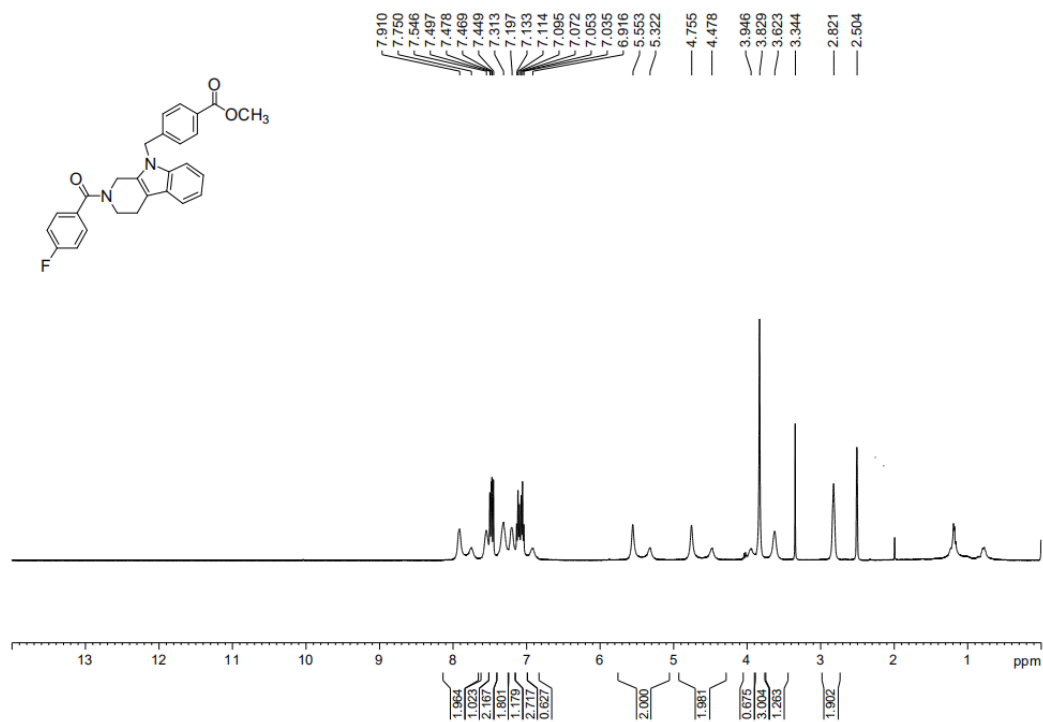

<sup>1</sup>H NMR spectrum of C11

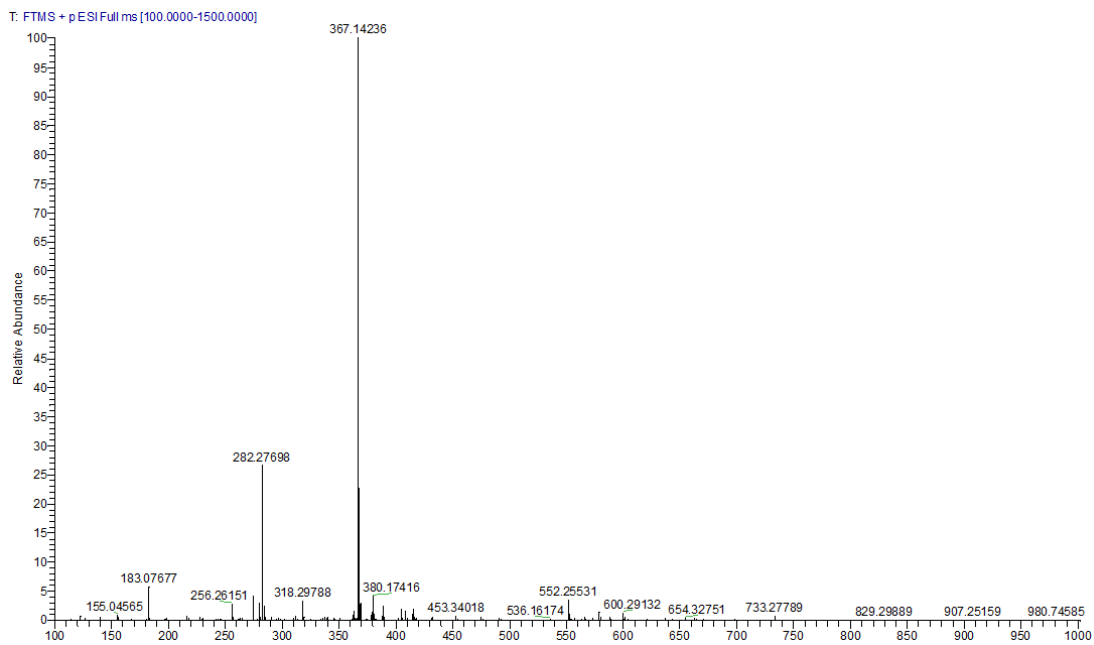

HRMS spectrum of C12

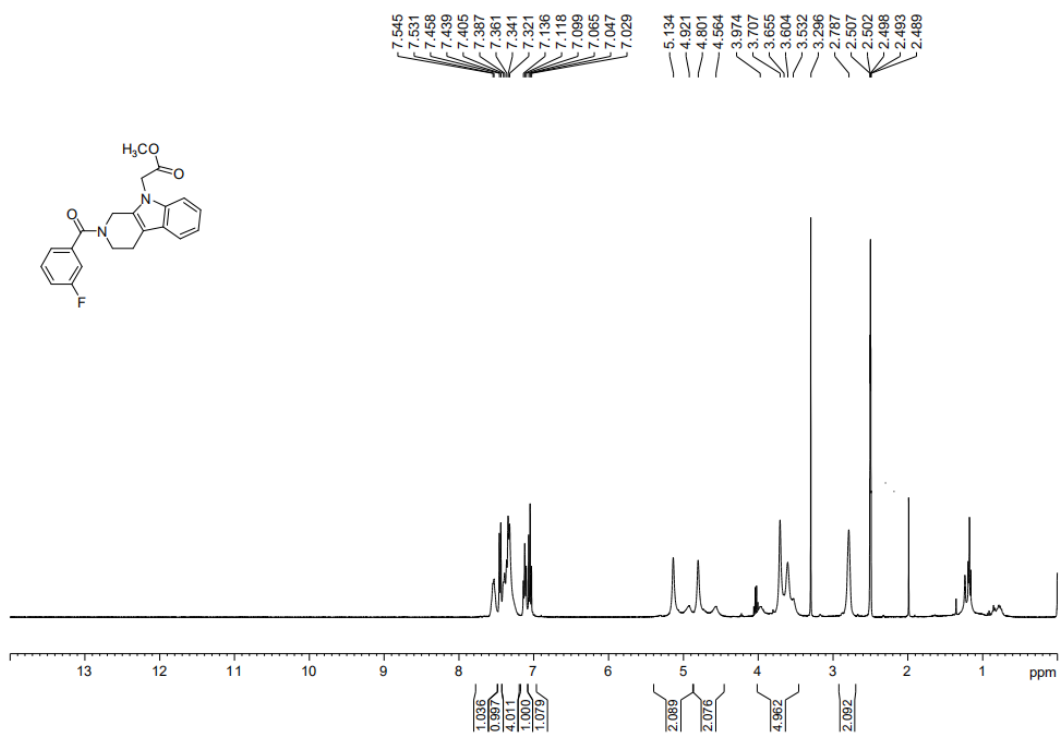

<sup>1</sup>H NMR spectrum of C12

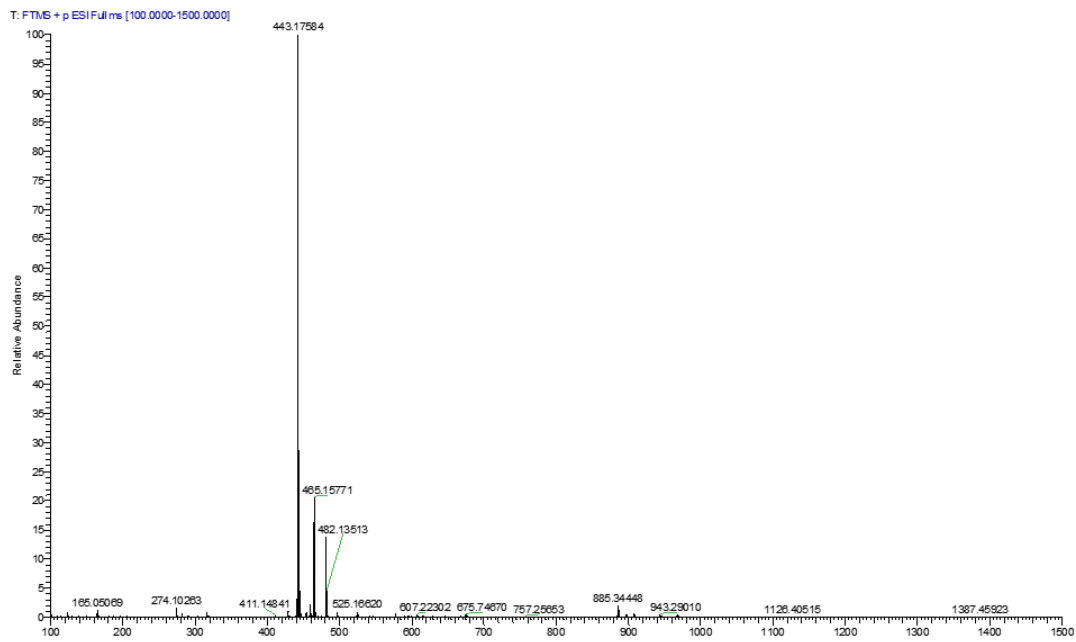

HRMS spectrum of C13

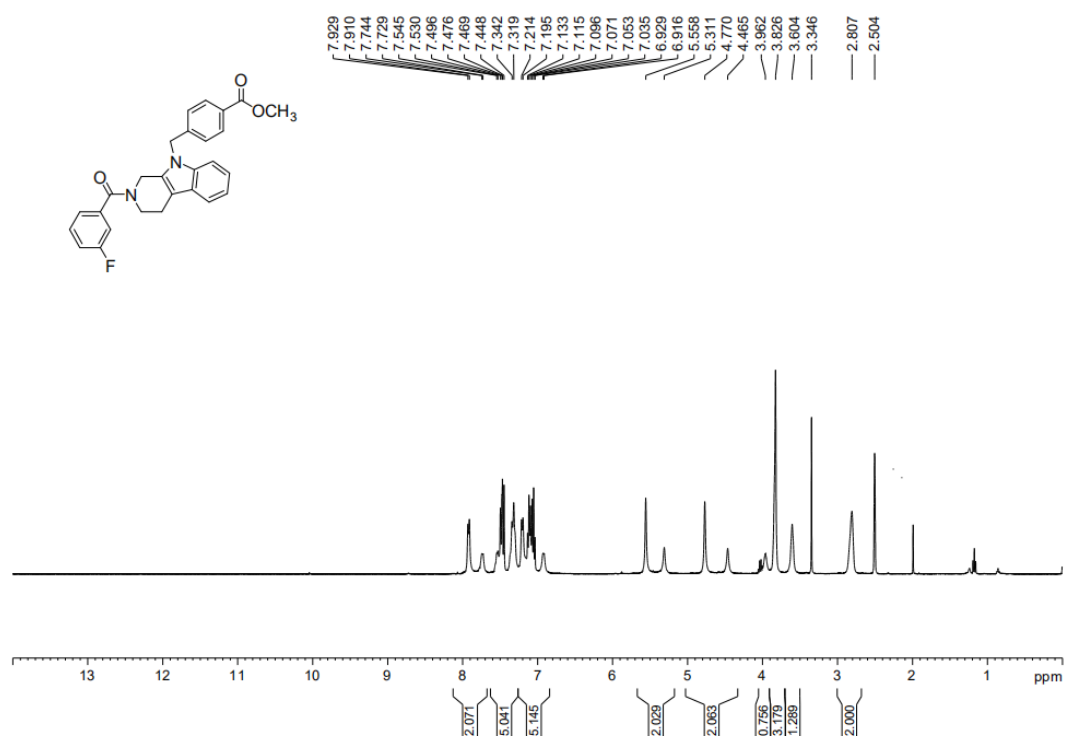

<sup>1</sup>H NMR spectrum of C13

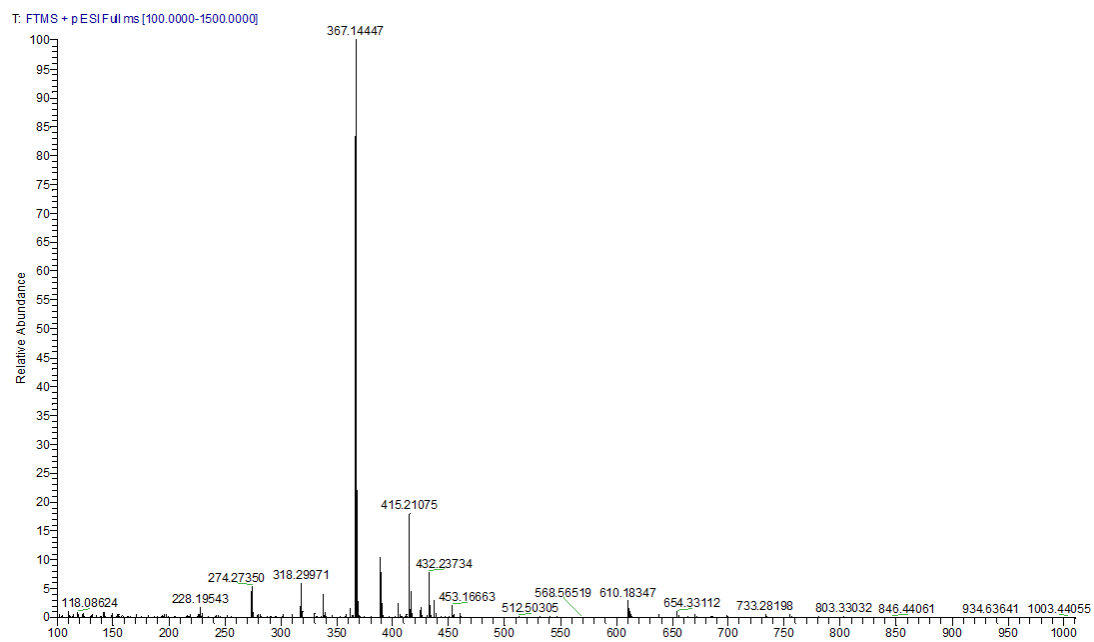

HRMS NMR spectrum of C14

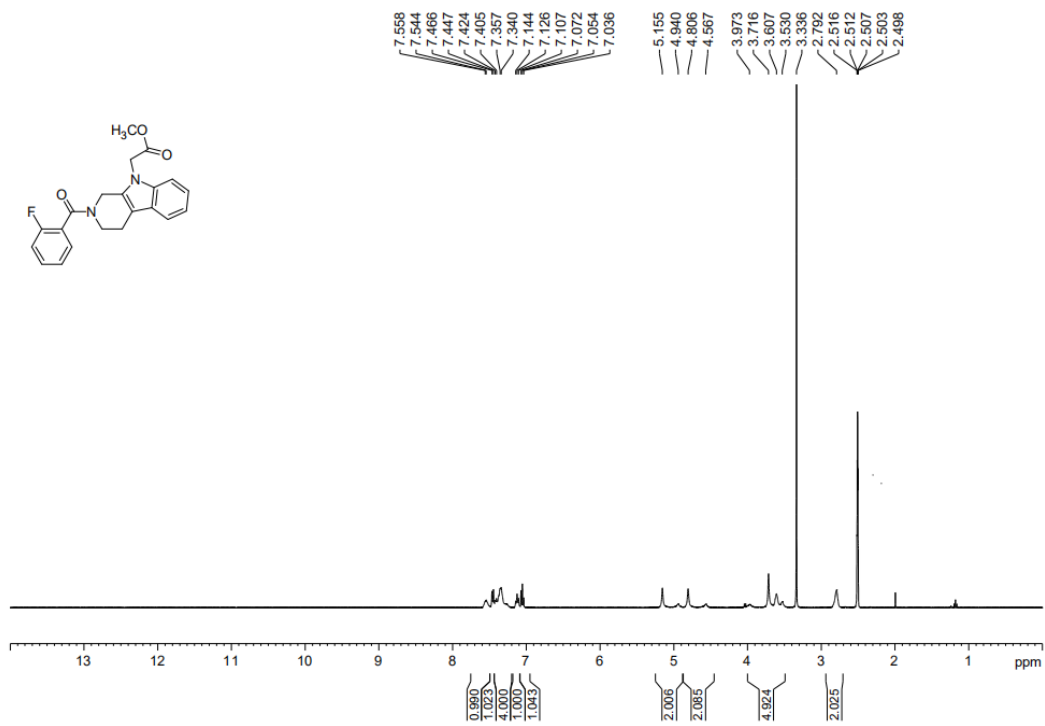

<sup>1</sup>H NMR spectrum of C14

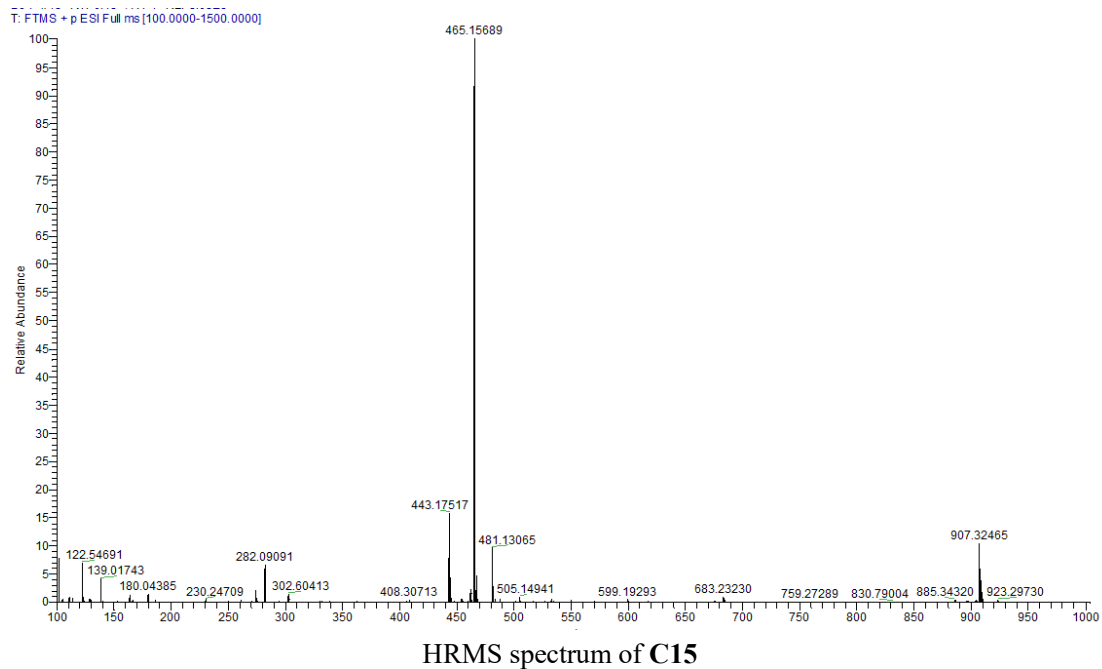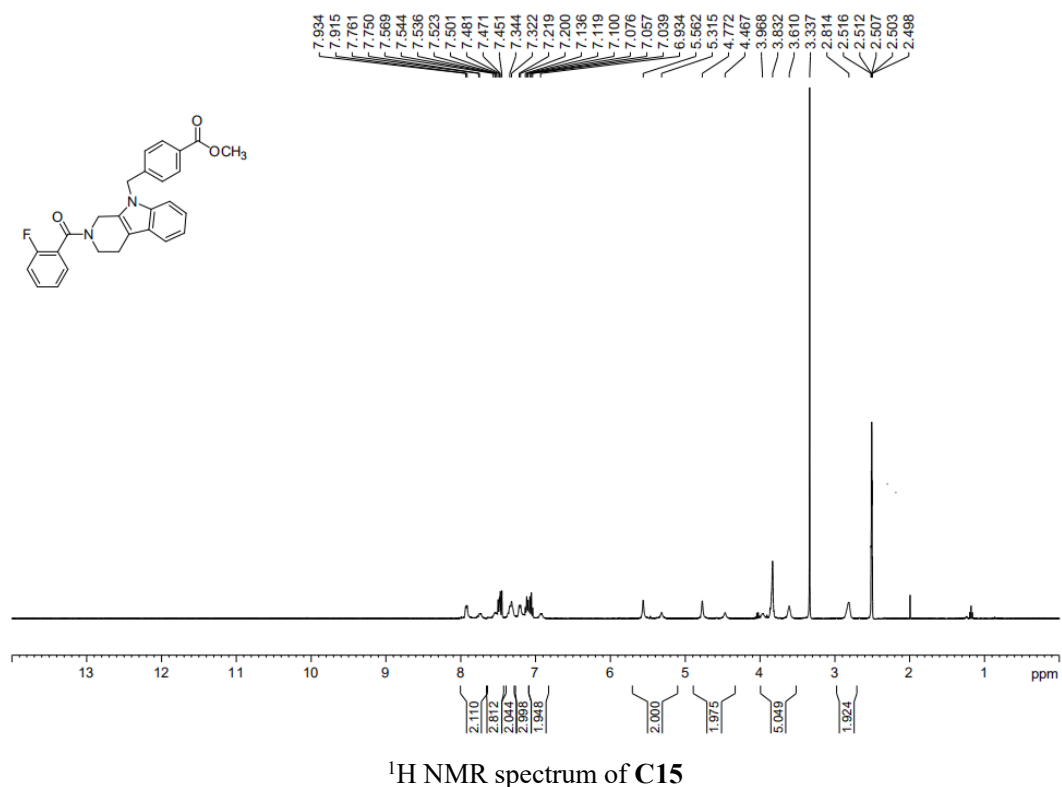

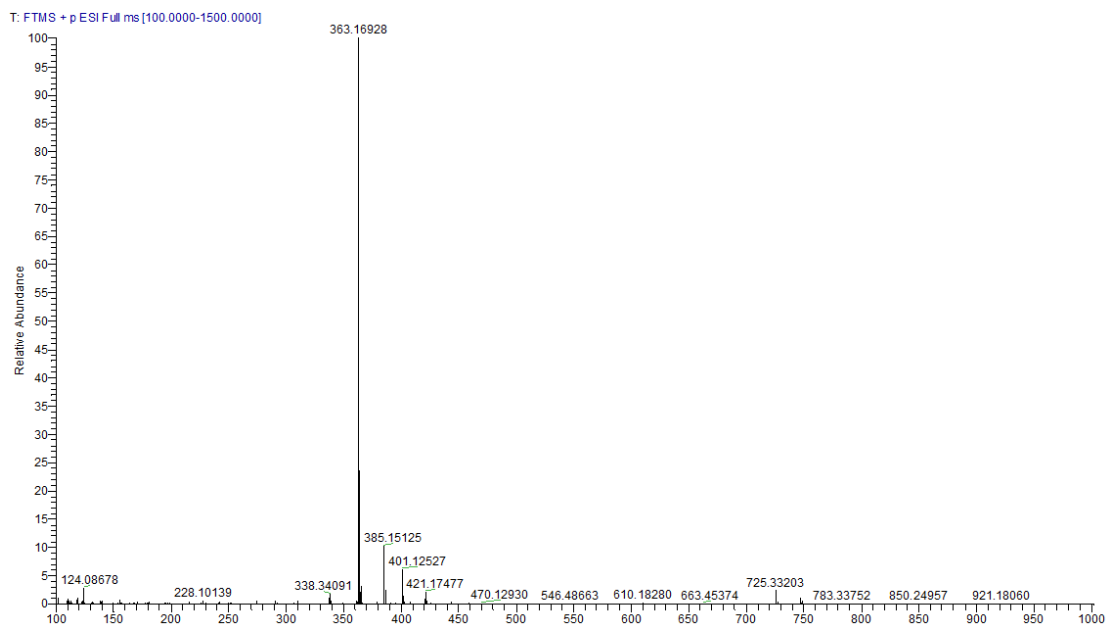

HRMS spectrum of C16

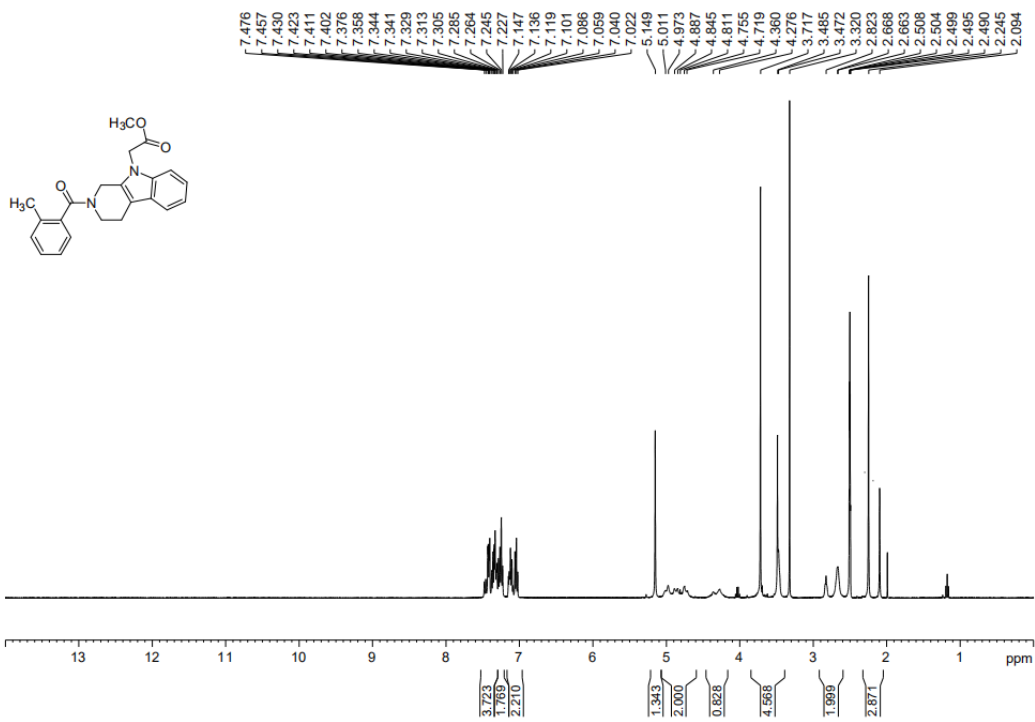

<sup>1</sup>H NMR spectrum of C16

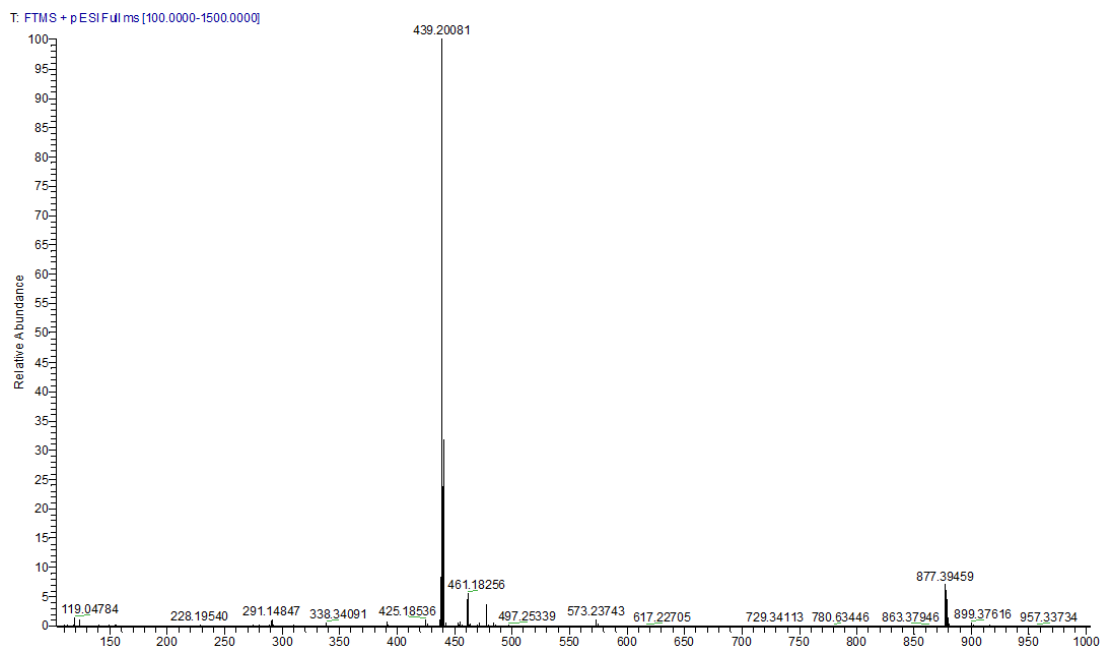

HRMS spectrum of C17

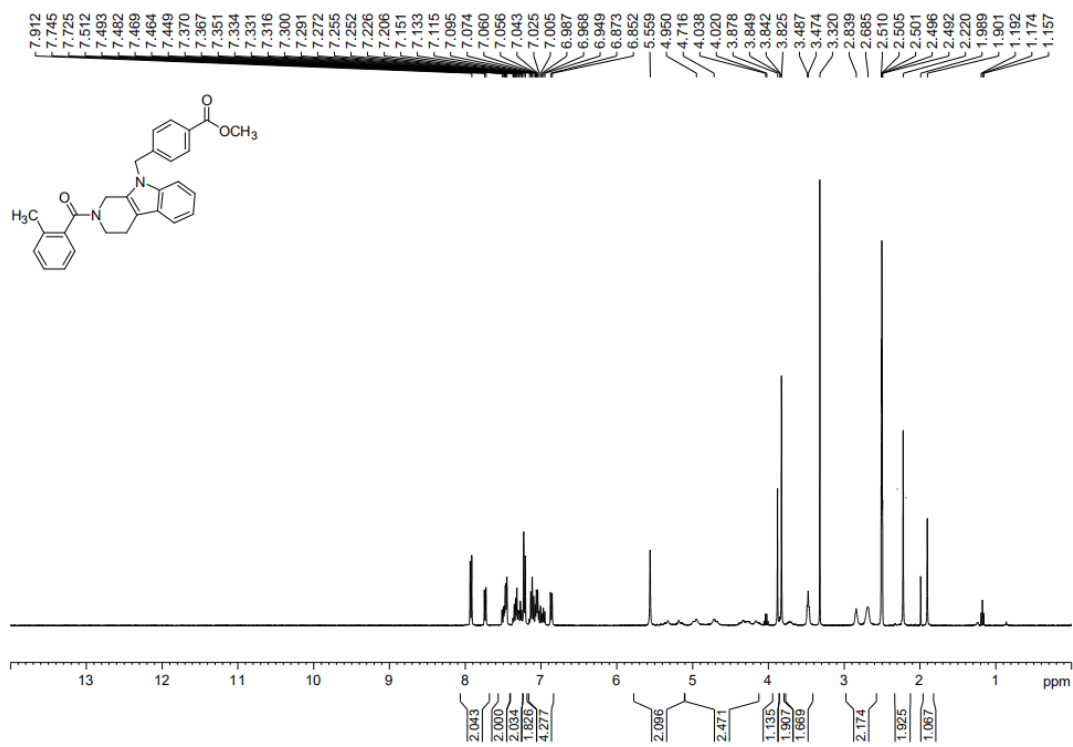

<sup>1</sup>H NMR spectrum of C17



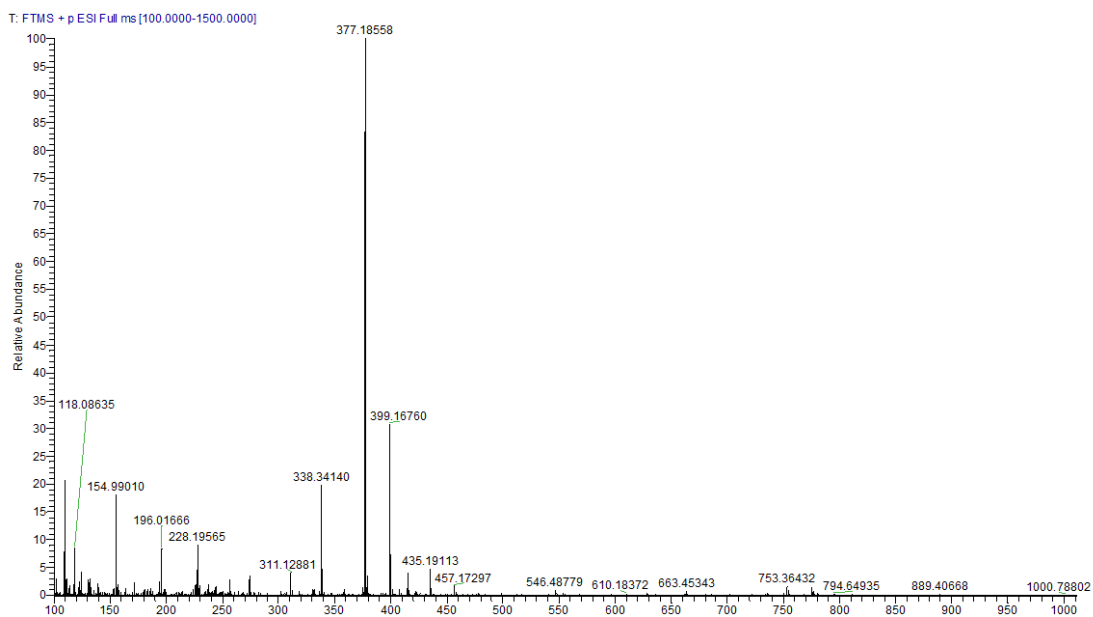

HRMS spectrum of C18

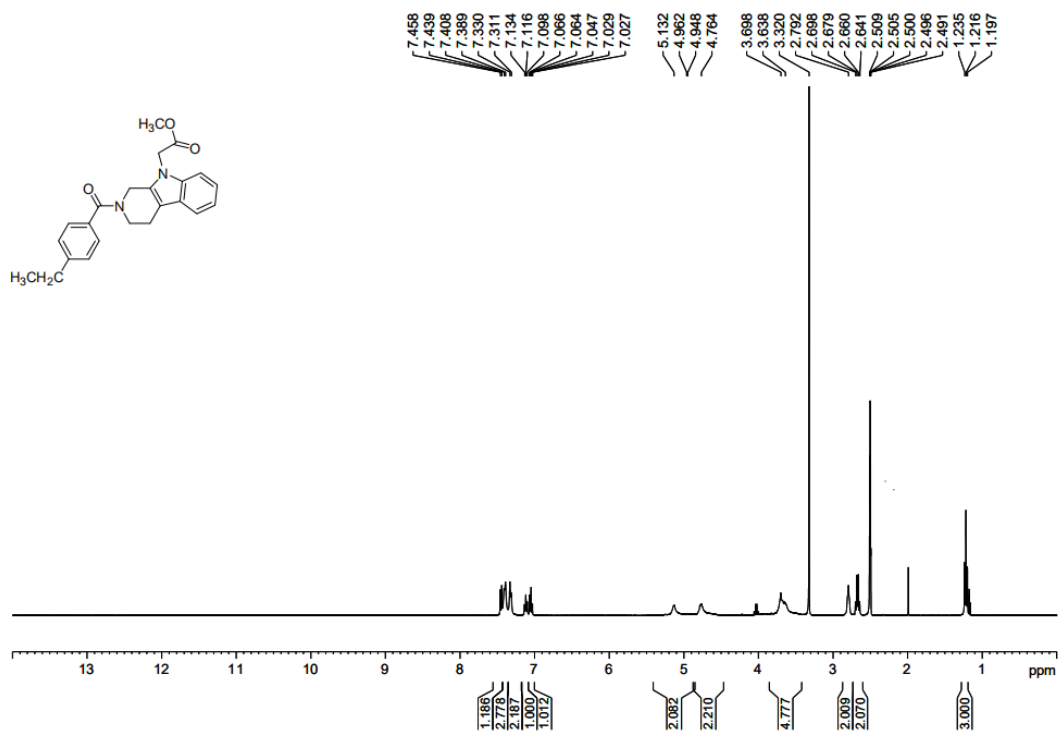

$^1H$  NMR spectrum of C18

T: FTMS - p ESI Full ms [200.0000-600.0000]

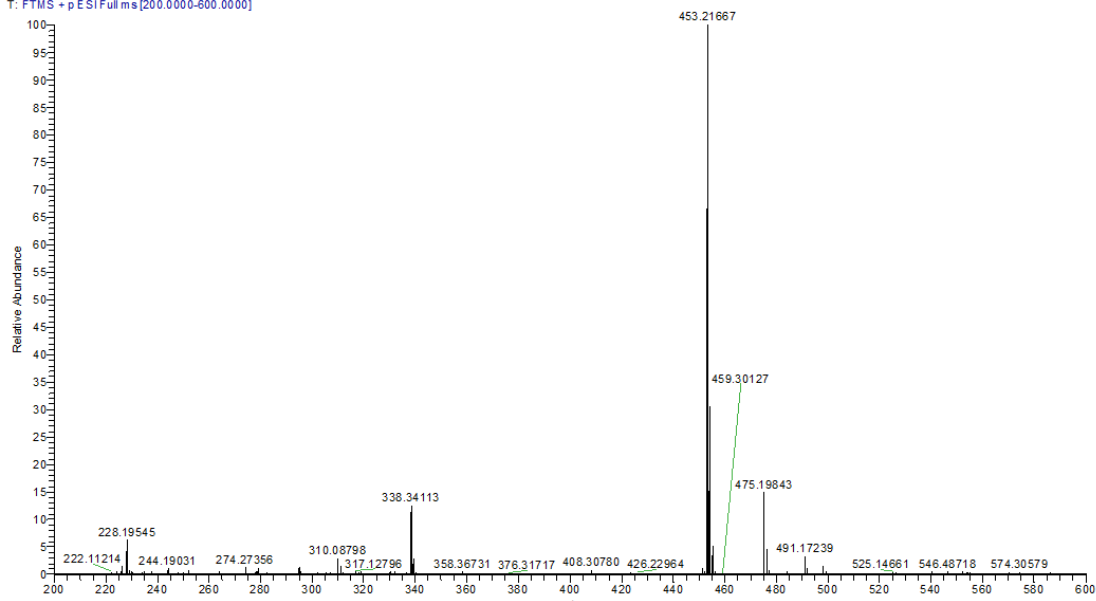

HRMS spectrum of C19

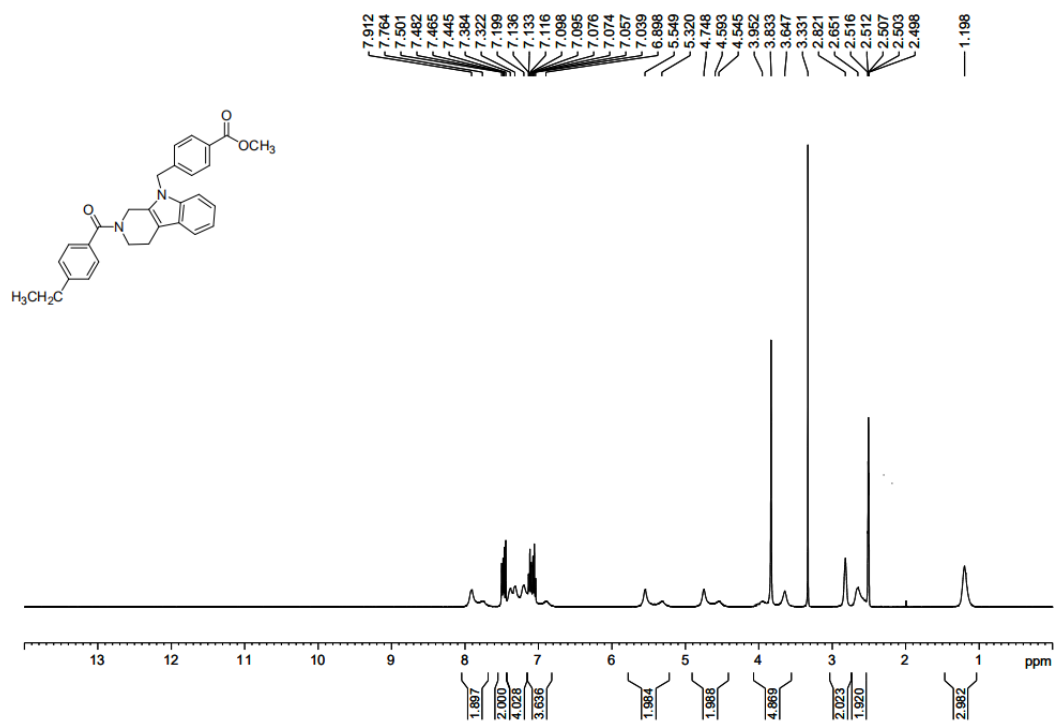

<sup>1</sup>H NMR spectrum of C19

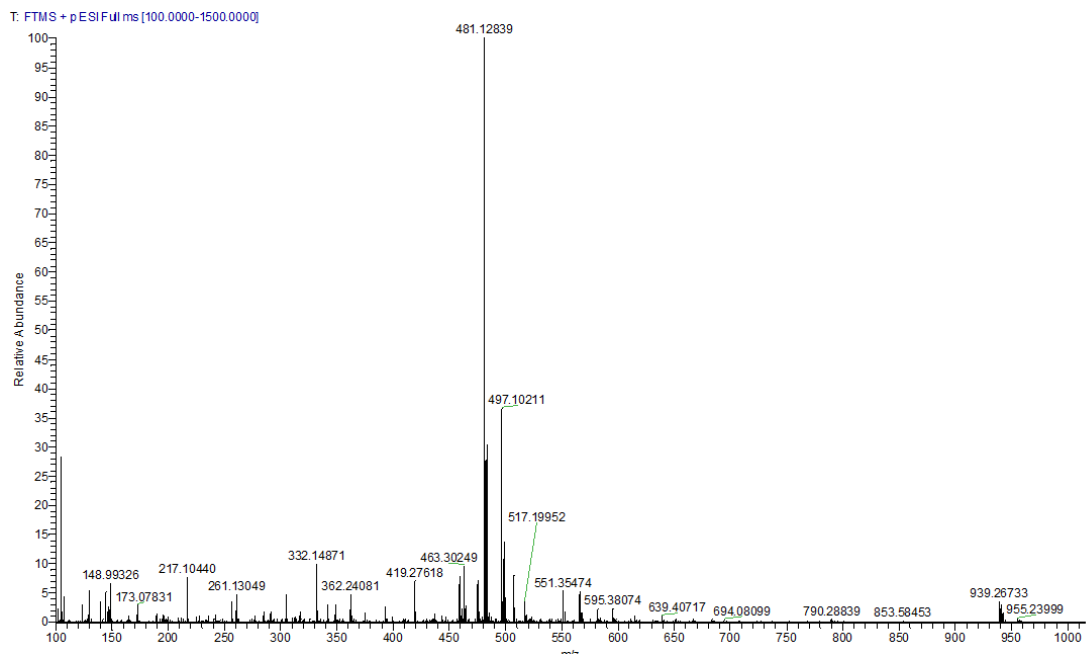

HRMS spectrum of C20

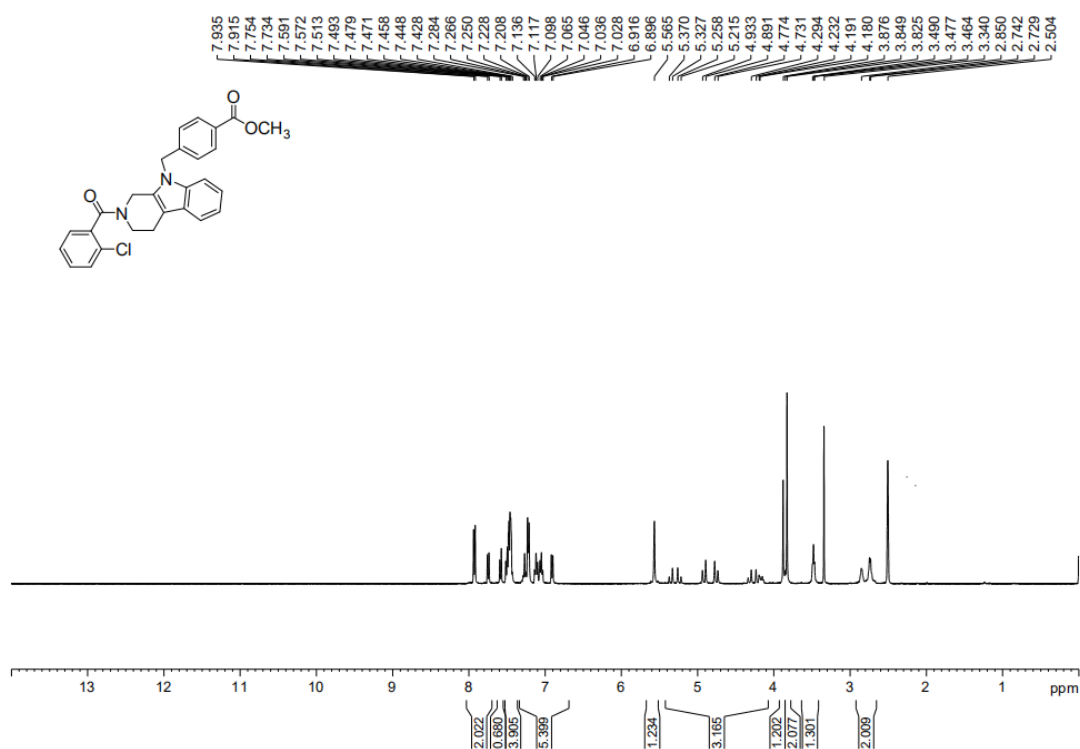

<sup>1</sup>H NMR spectrum of C20

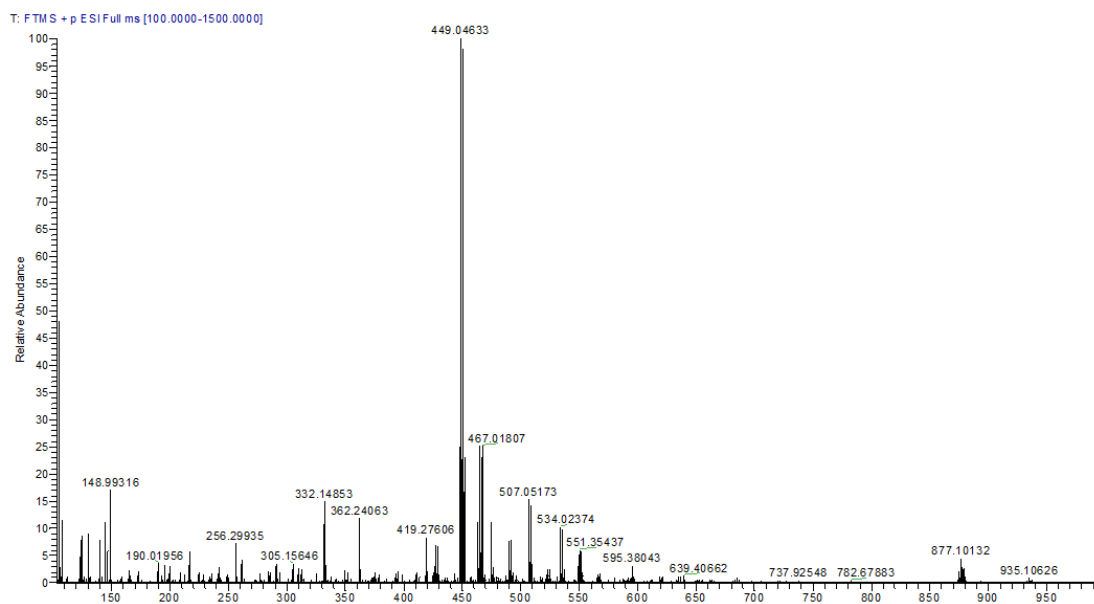

HRMS spectrum of C21

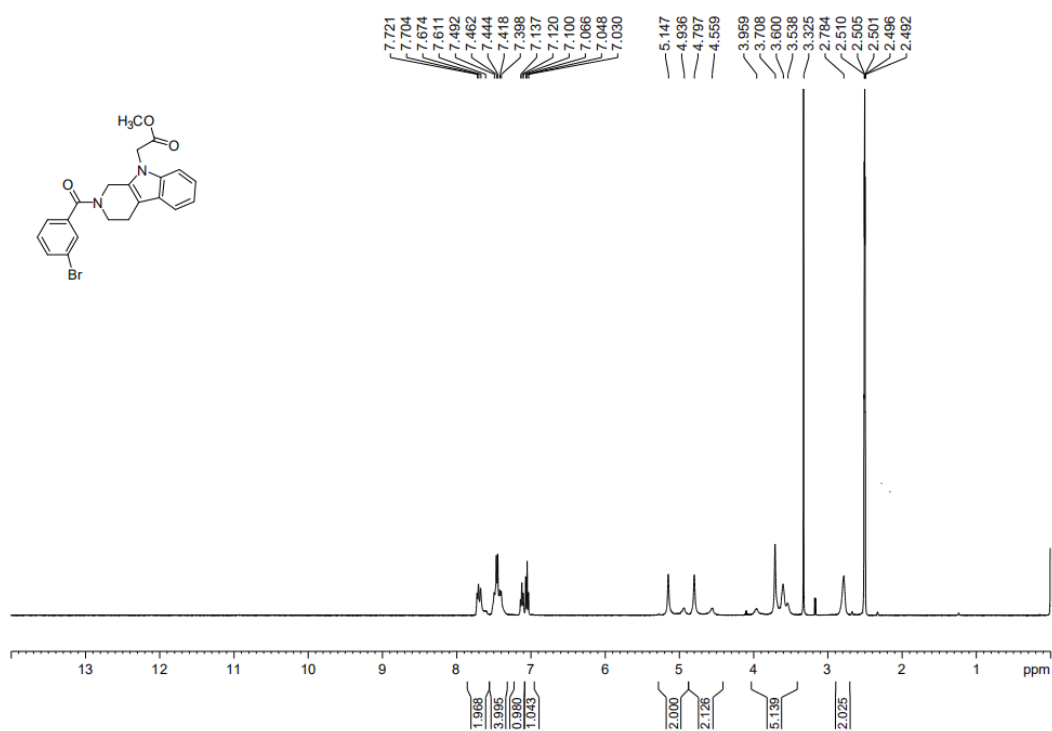

<sup>1</sup>H NMR spectrum of C21

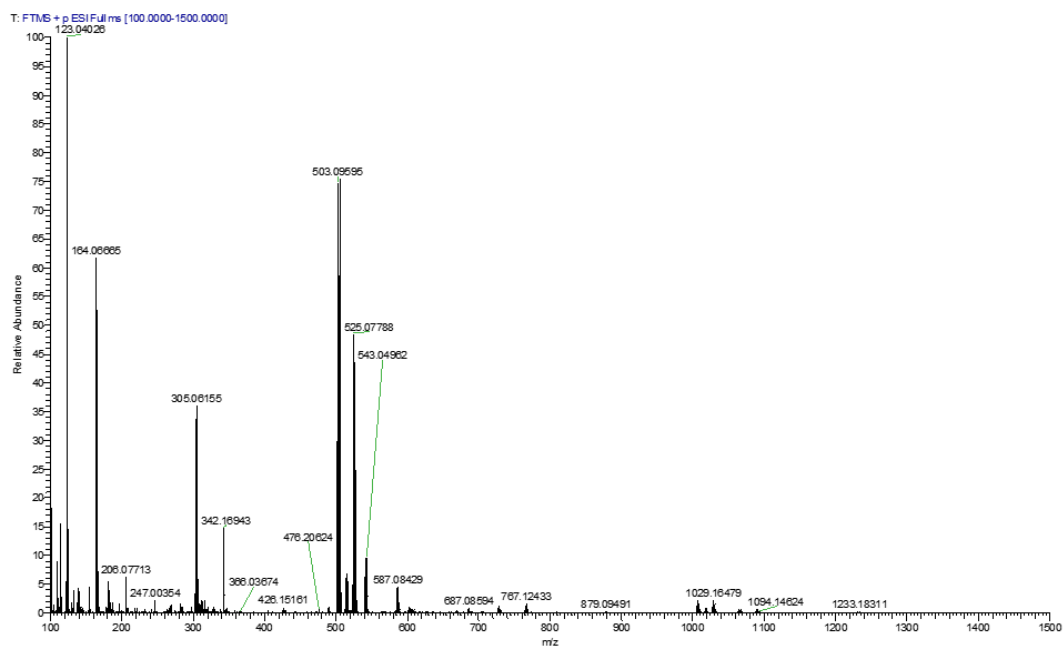

HRMS spectrum of C22

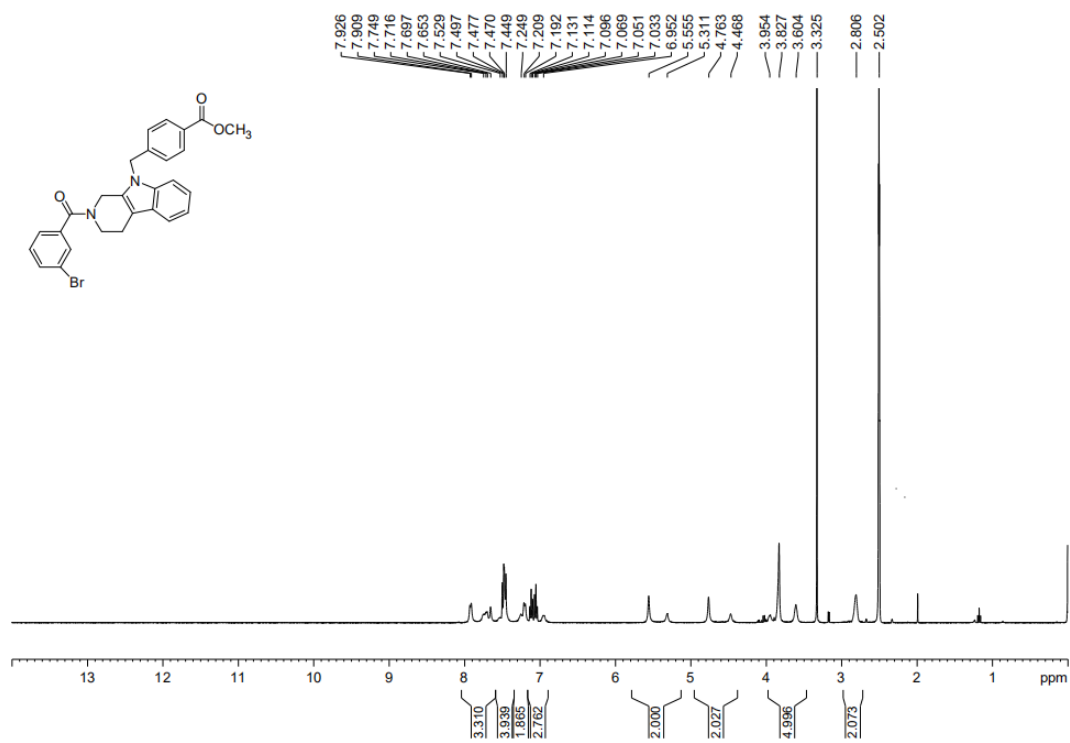

<sup>1</sup>H NMR spectrum of C22

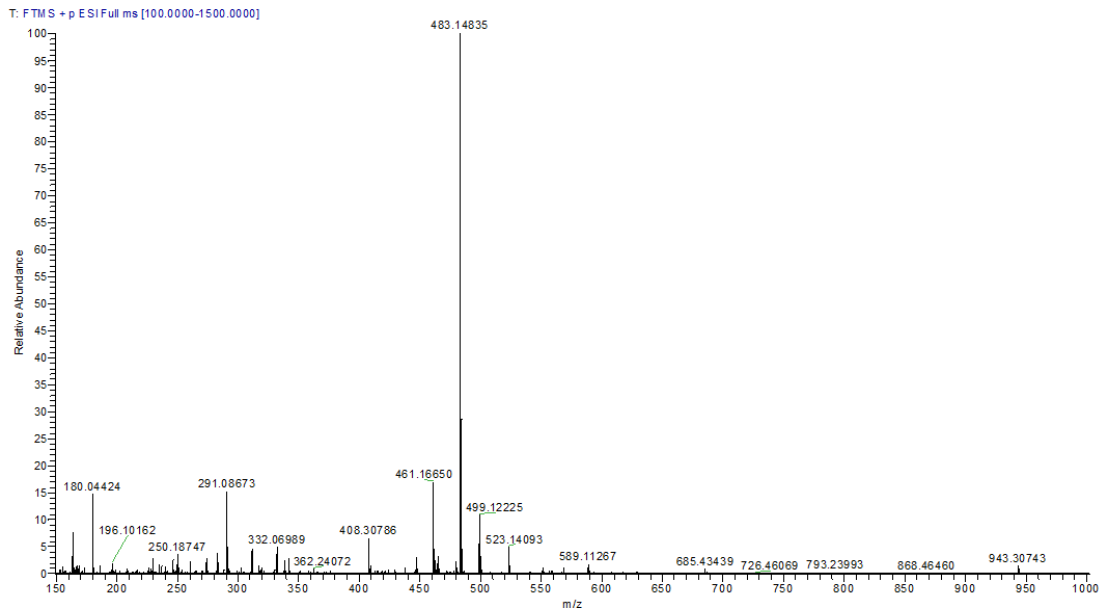

HRMS spectrum of C23

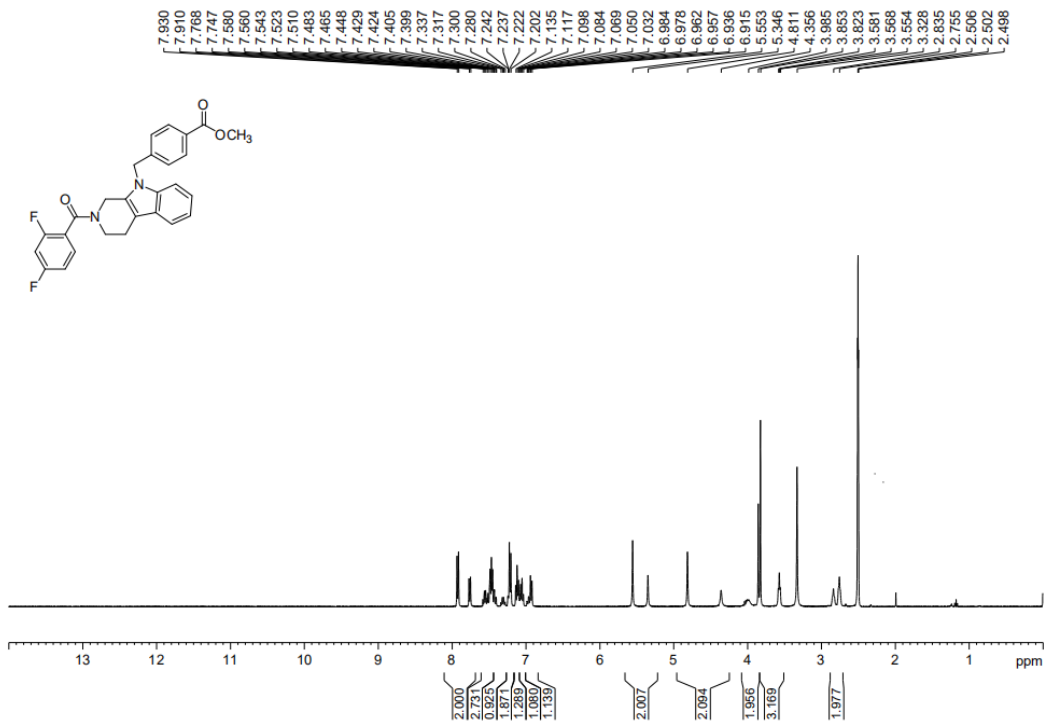

<sup>1</sup>H NMR spectrum of C23

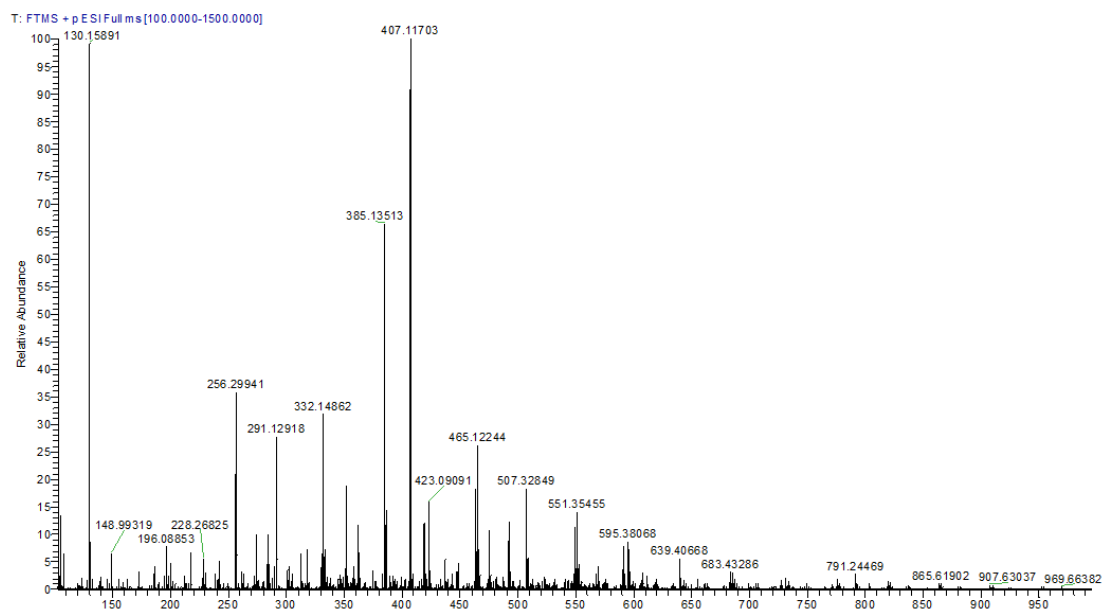

HRMS spectrum of C24

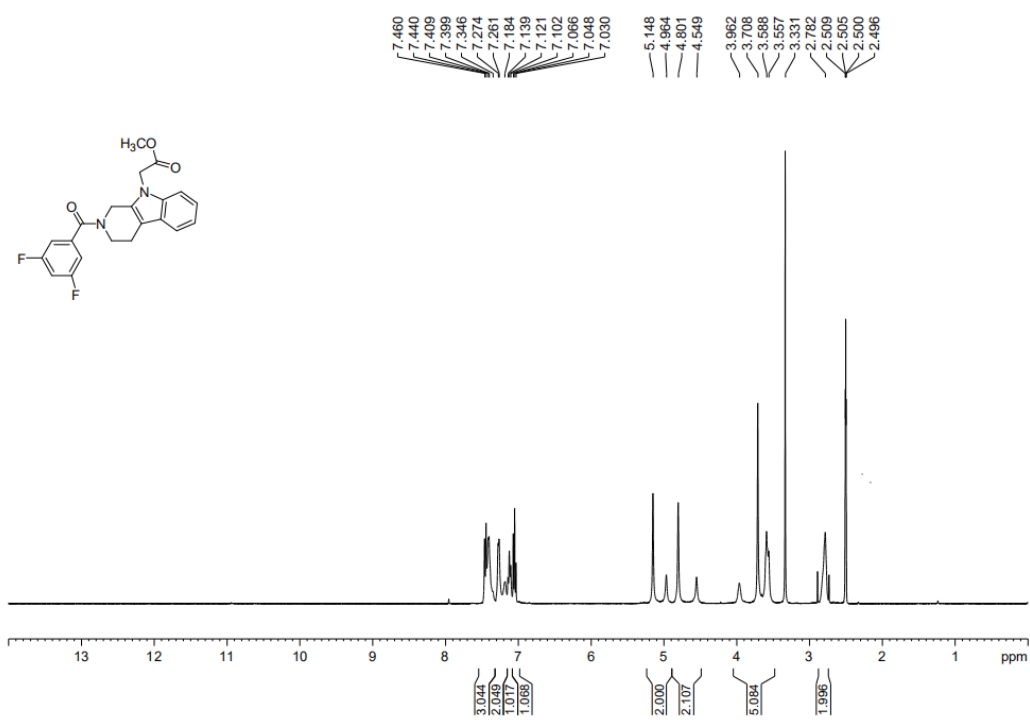

<sup>1</sup>H NMR spectrum of C24

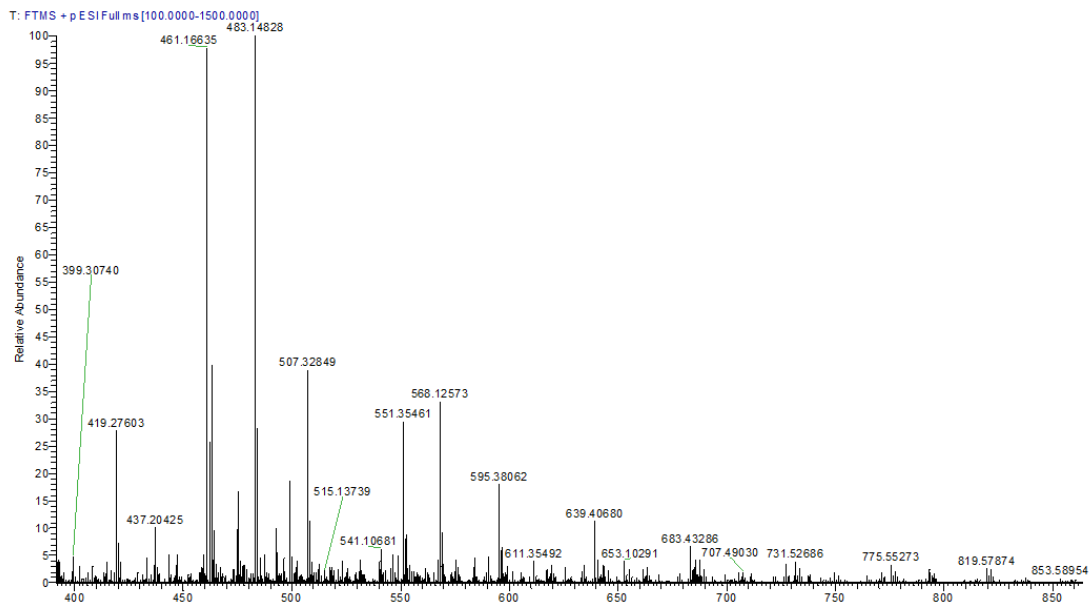

HRMS spectrum of C25

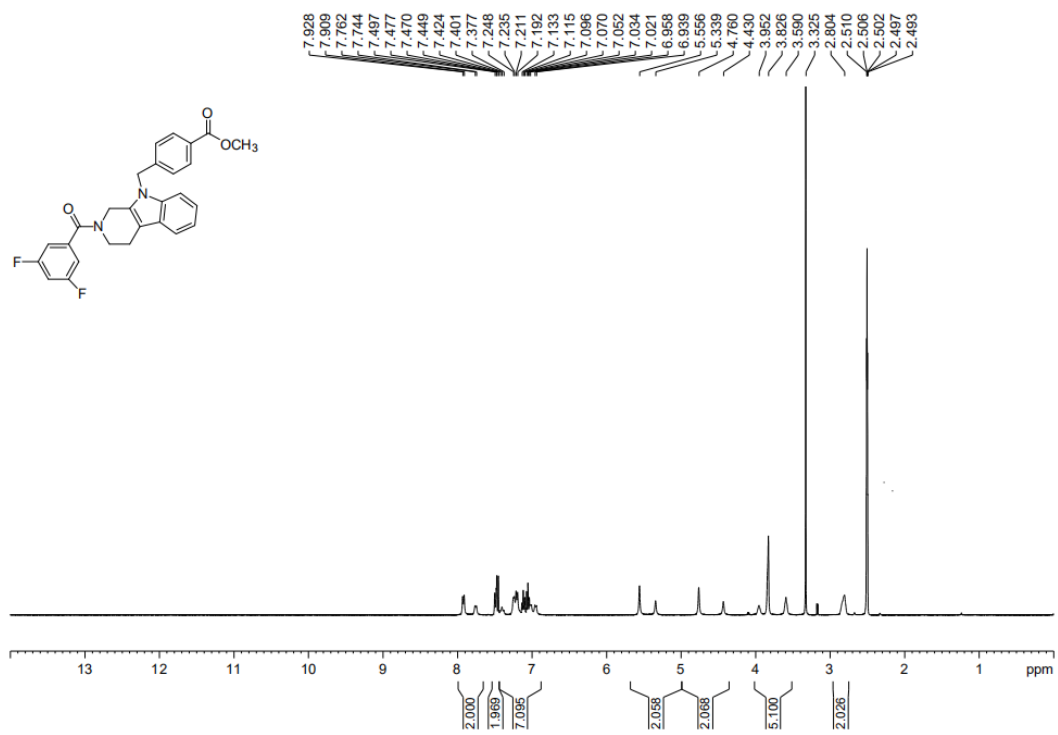

<sup>1</sup>H NMR spectrum of C25



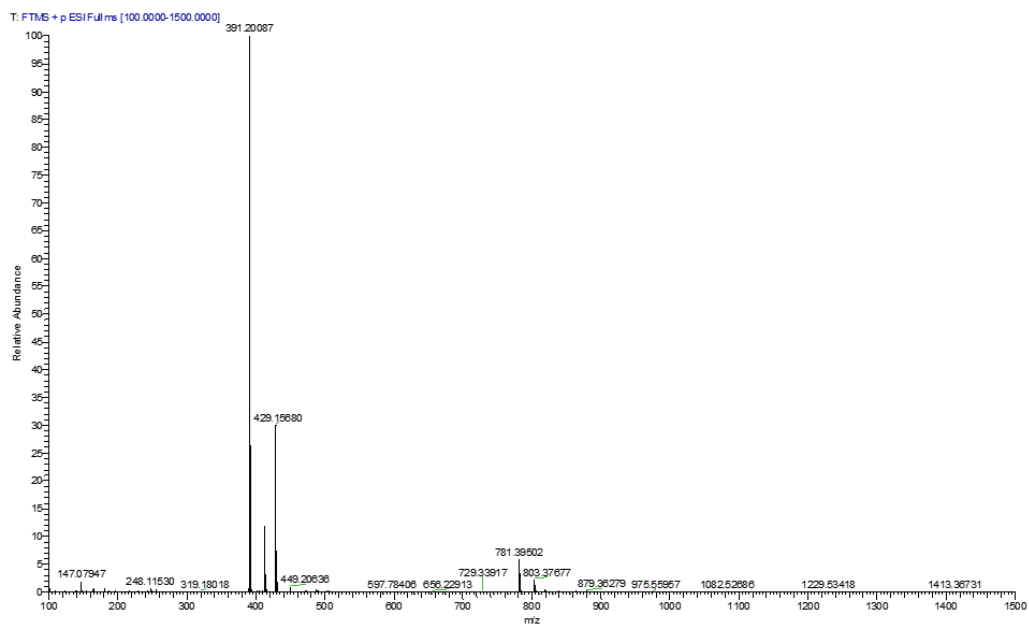

HRMS spectrum of C26

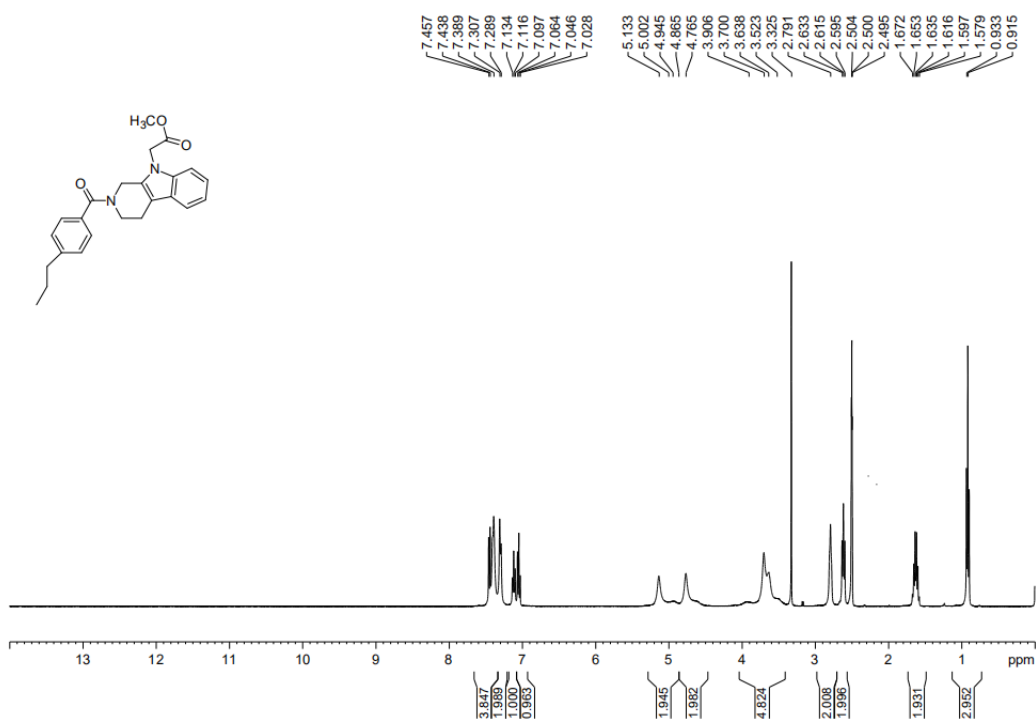

<sup>1</sup>H NMR spectrum of C26

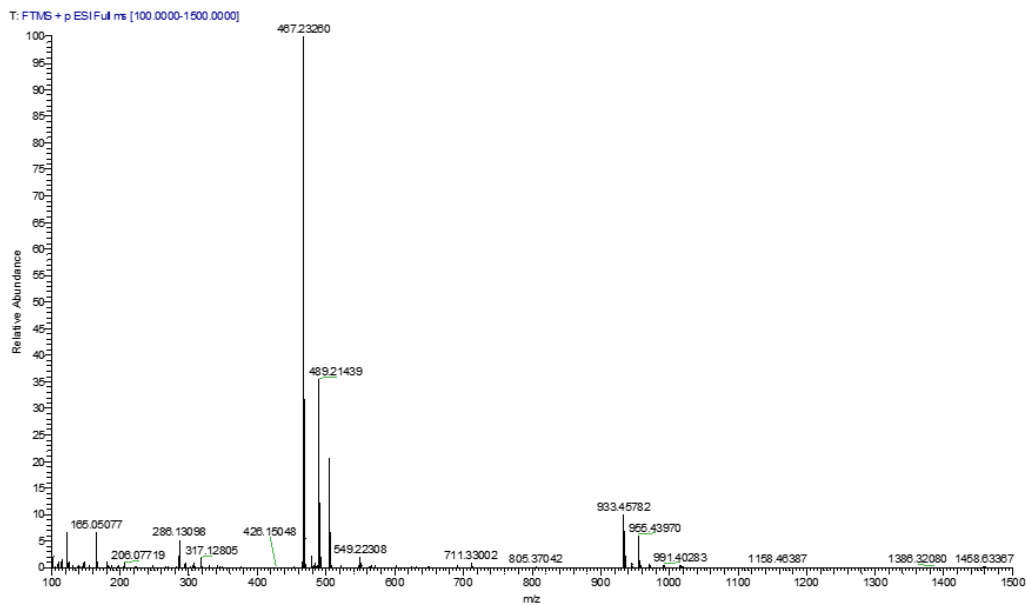

HRMS spectrum of C27

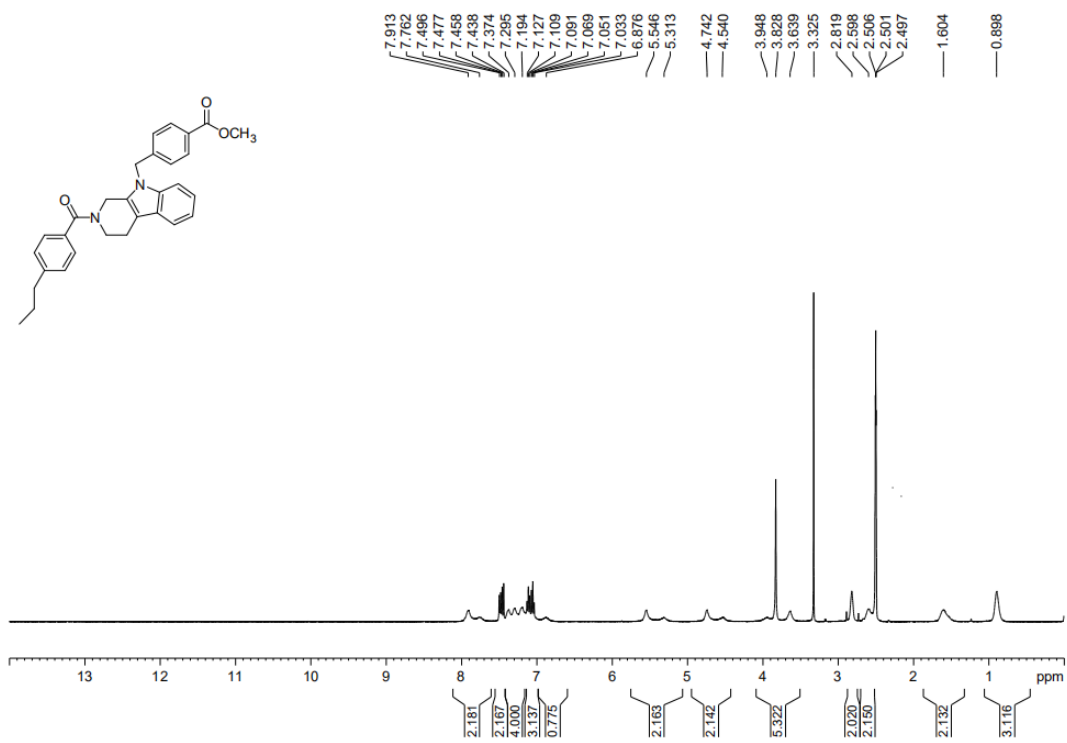

<sup>1</sup>H NMR spectrum of C27

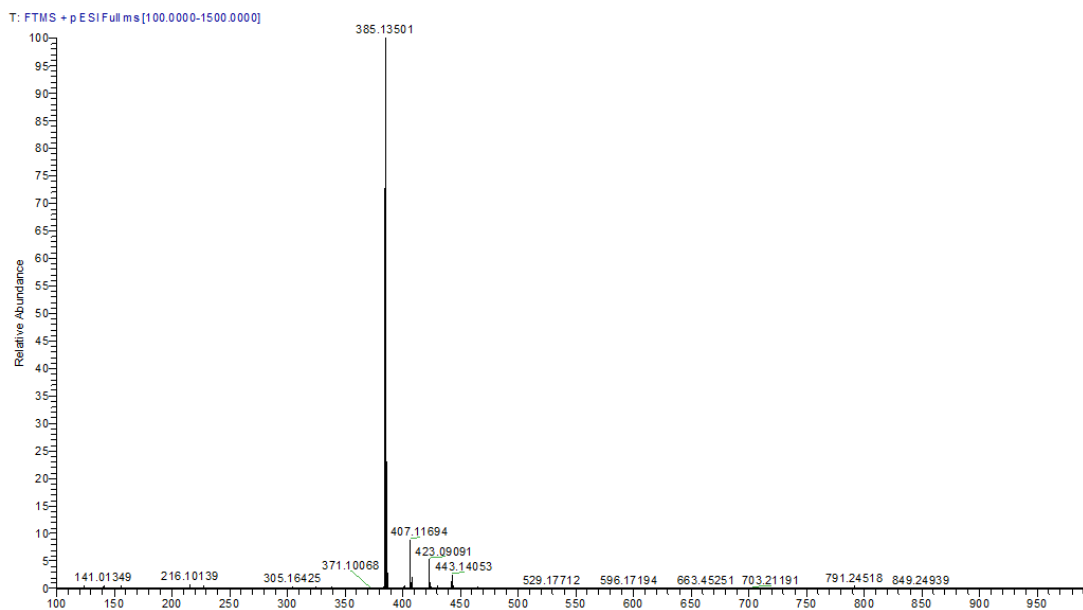

HRMS spectrum of C28

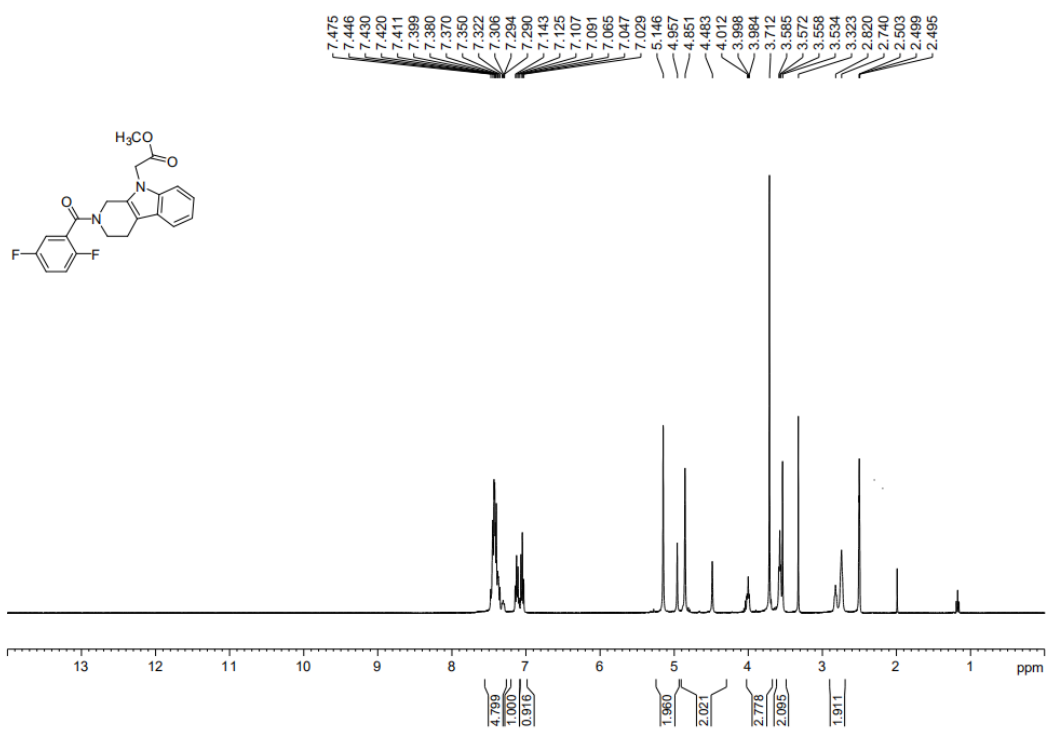

<sup>1</sup>H NMR spectrum of C28

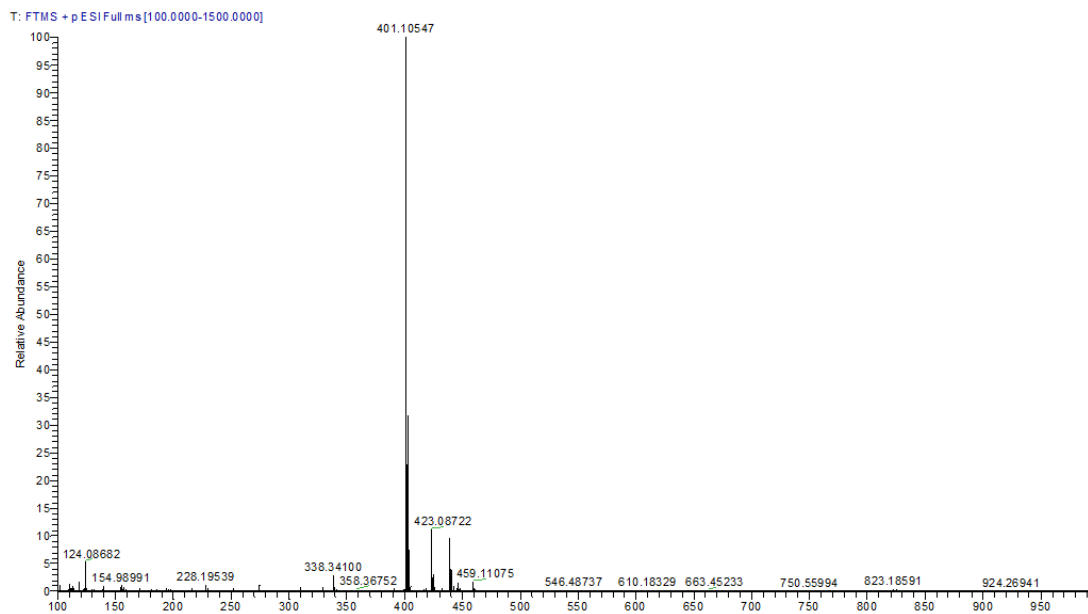

HRMS spectrum of C29

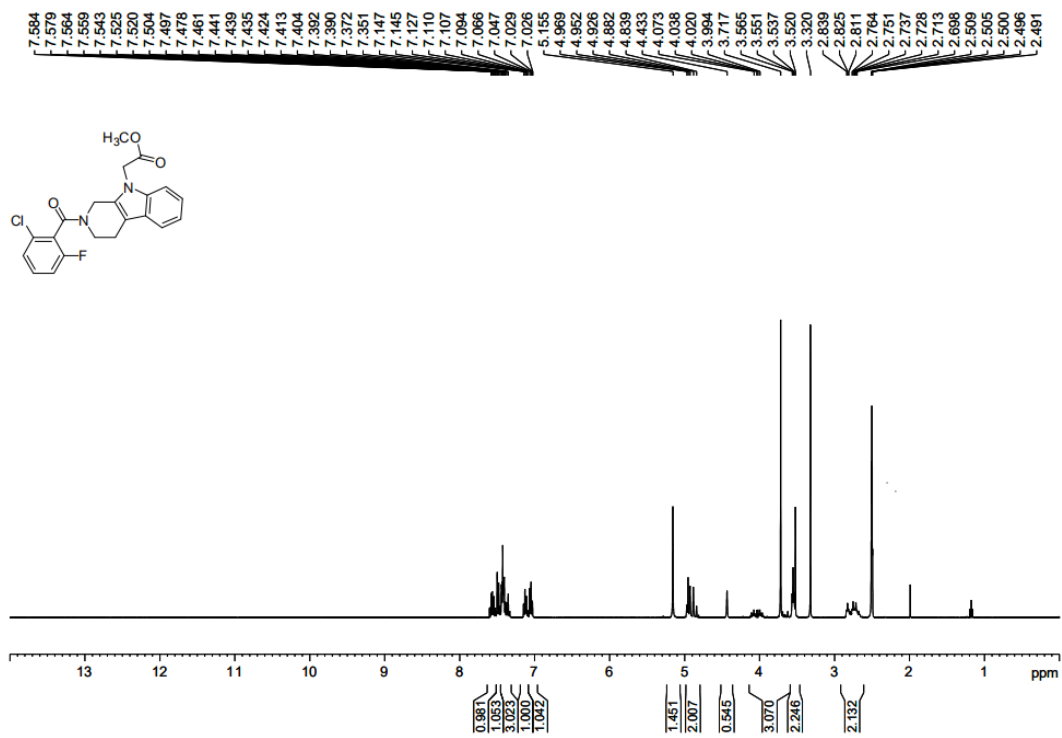

<sup>1</sup>H NMR spectrum of C29

T: FTMS + p ESI Full ms [100.0000-1500.0000]

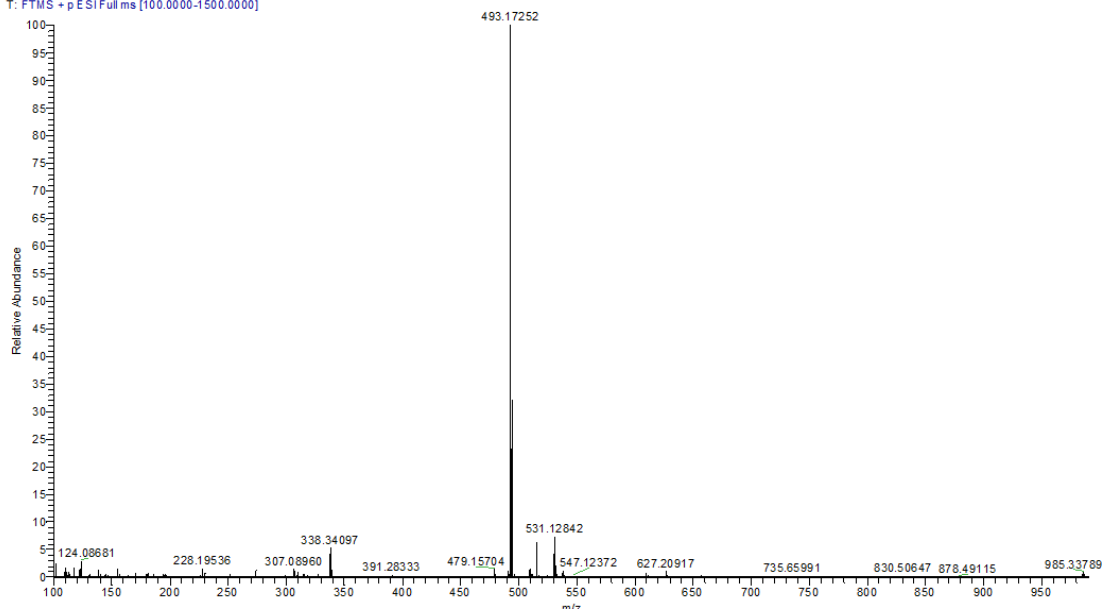

HRMS spectrum of D1

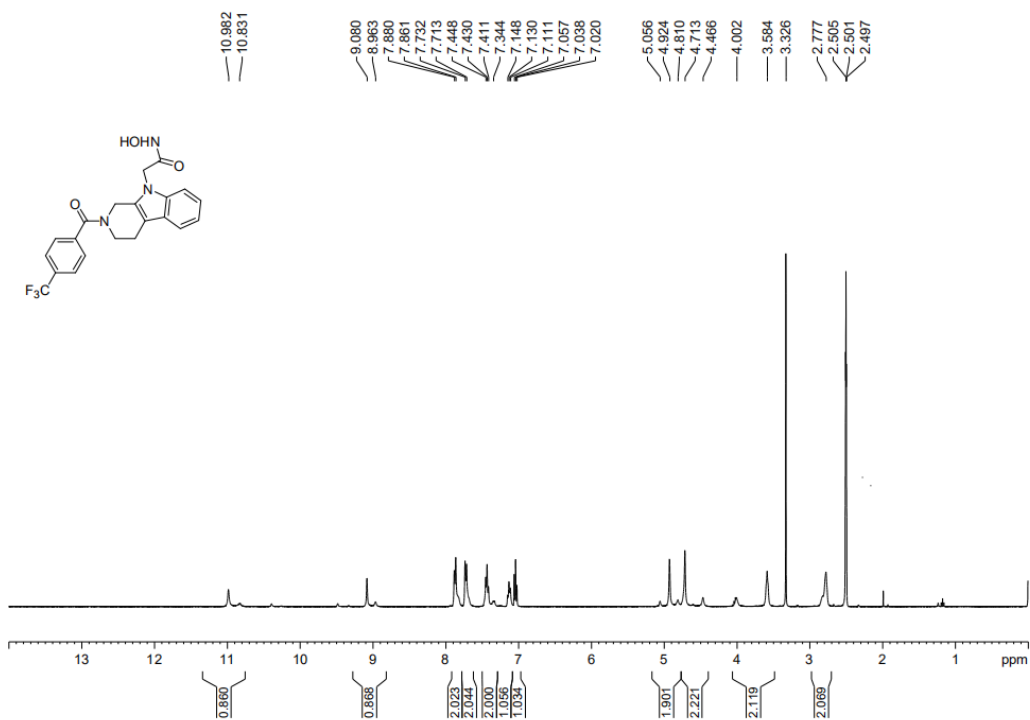

<sup>1</sup>H NMR spectrum of D1

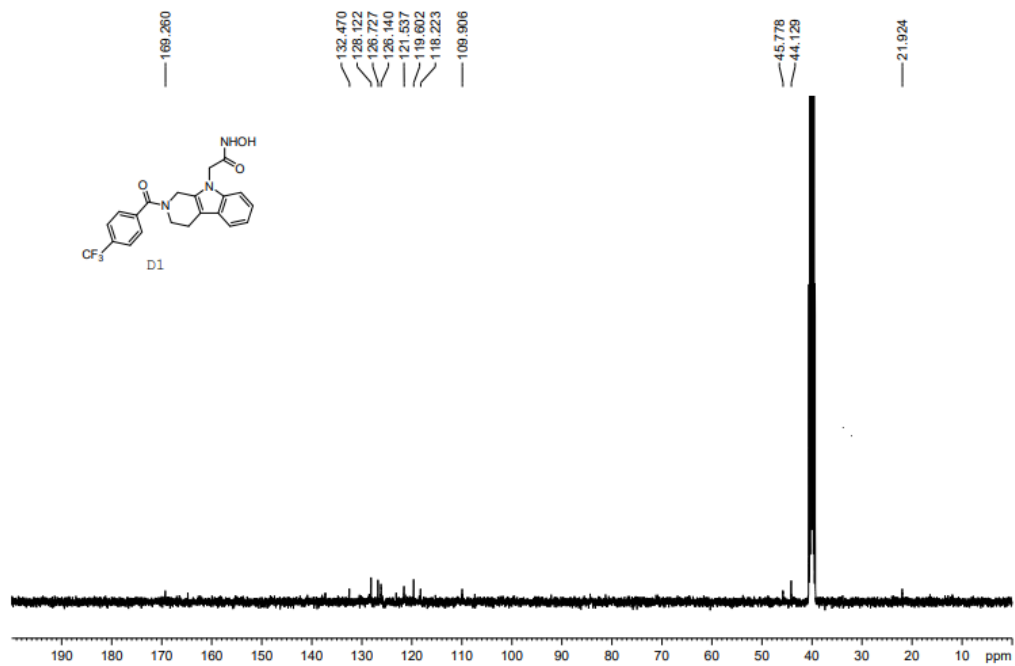

<sup>13</sup>C NMR spectrum of **D1**

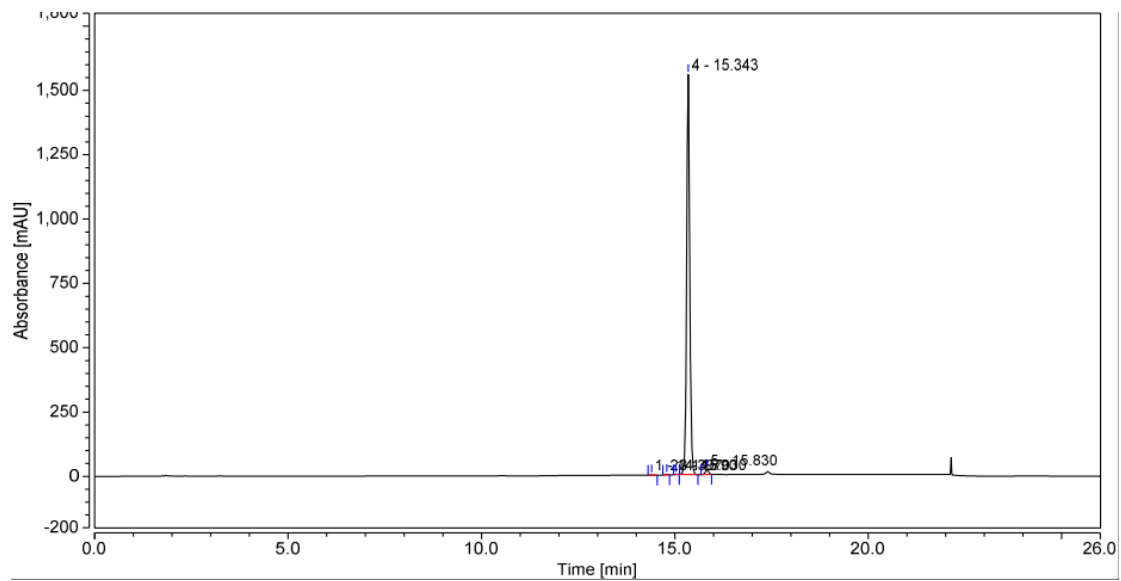

HPLC spectrum of **D1**

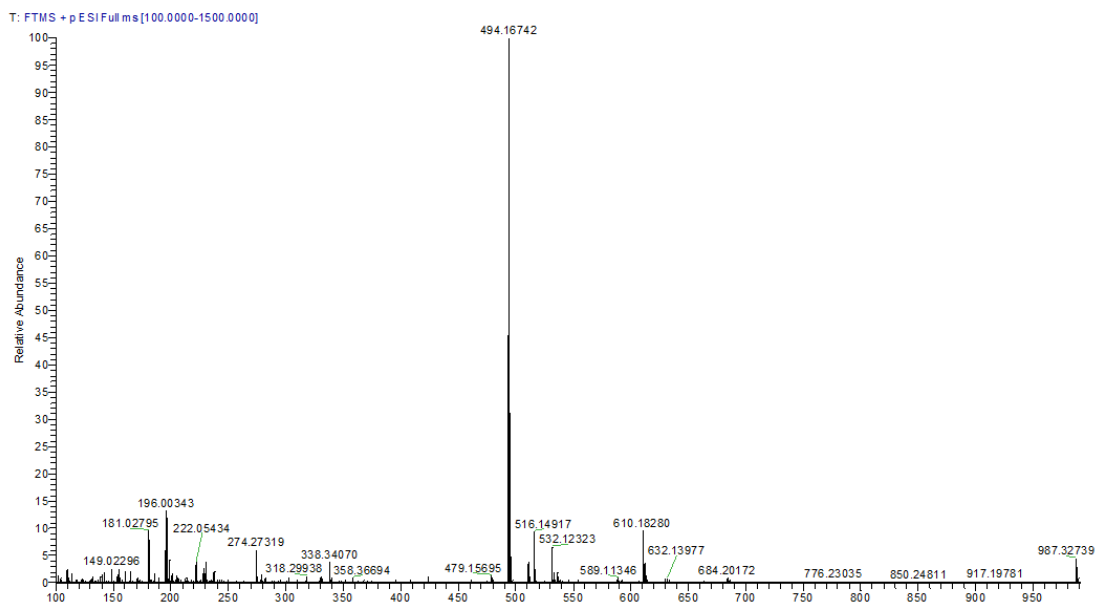

HRMS spectrum of **D2**

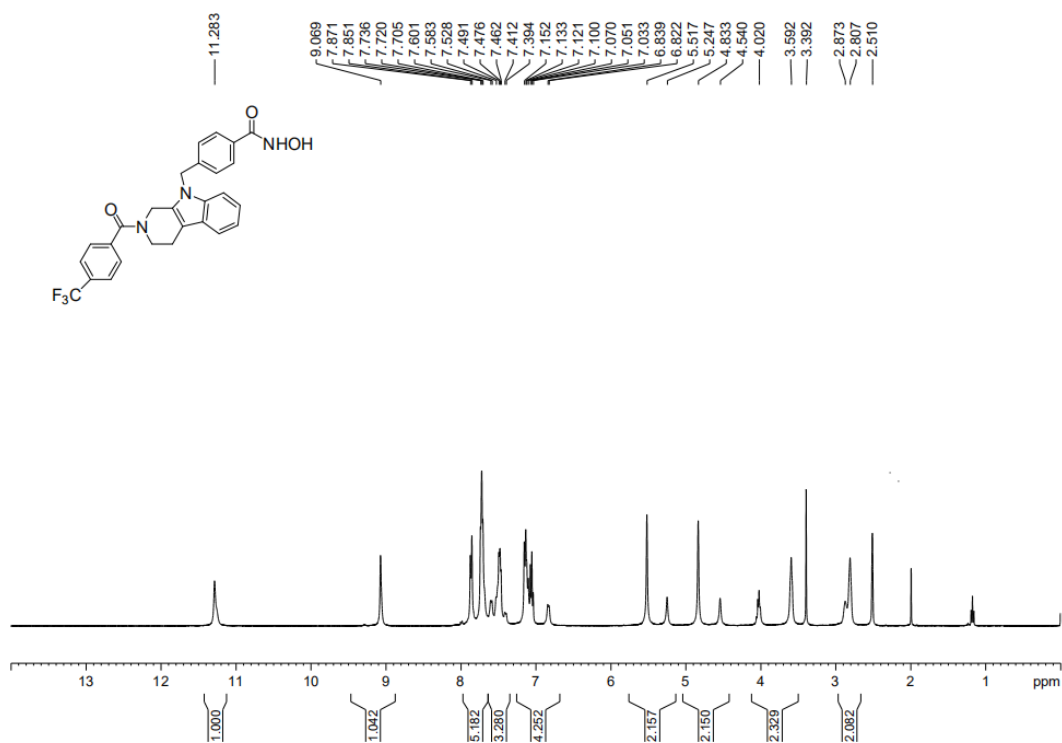

$^1\text{H}$  NMR spectrum of **D2**

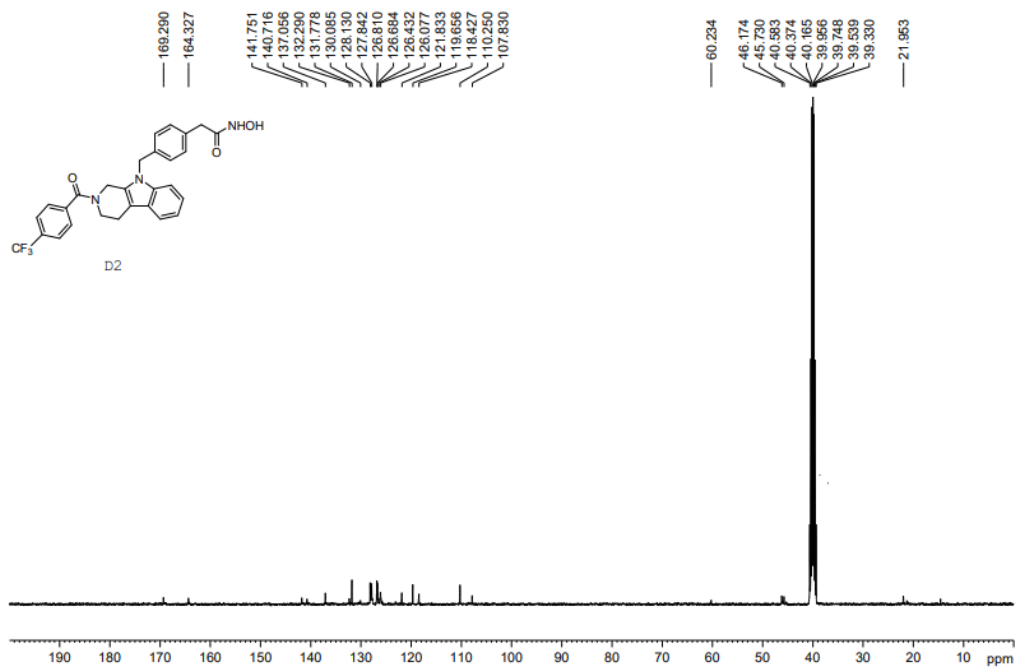

<sup>13</sup>C NMR spectrum of **D2**

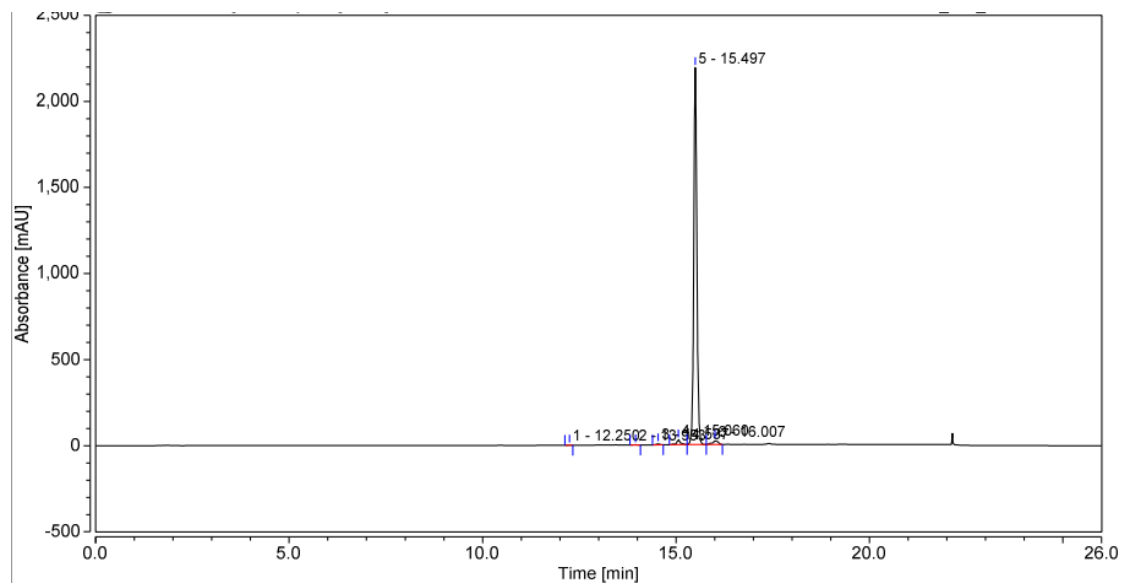

HPLC spectrum of **D2**



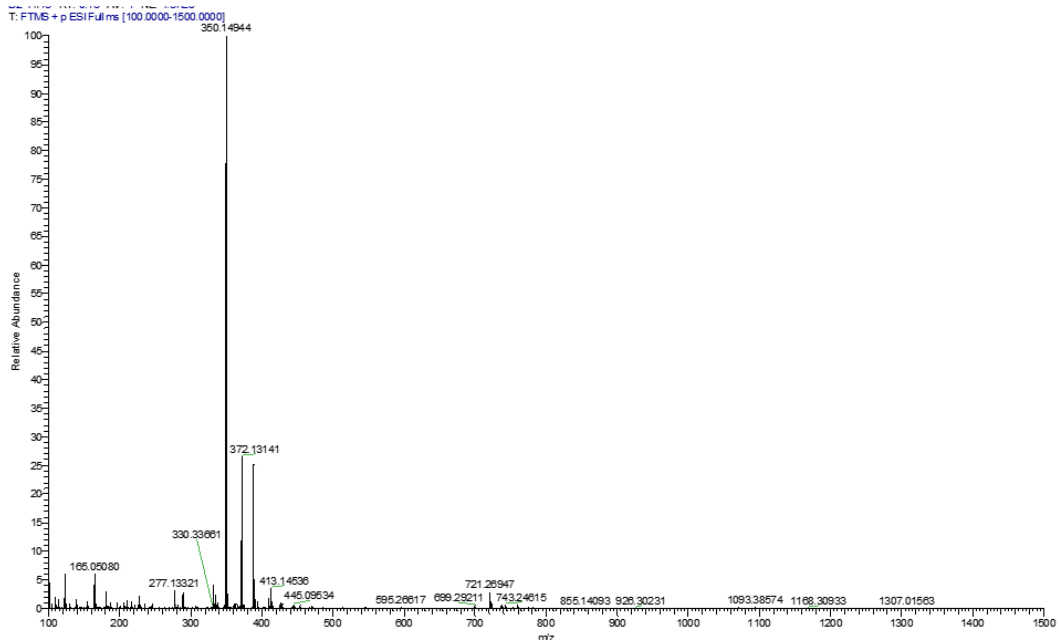

HRMS spectrum of D3

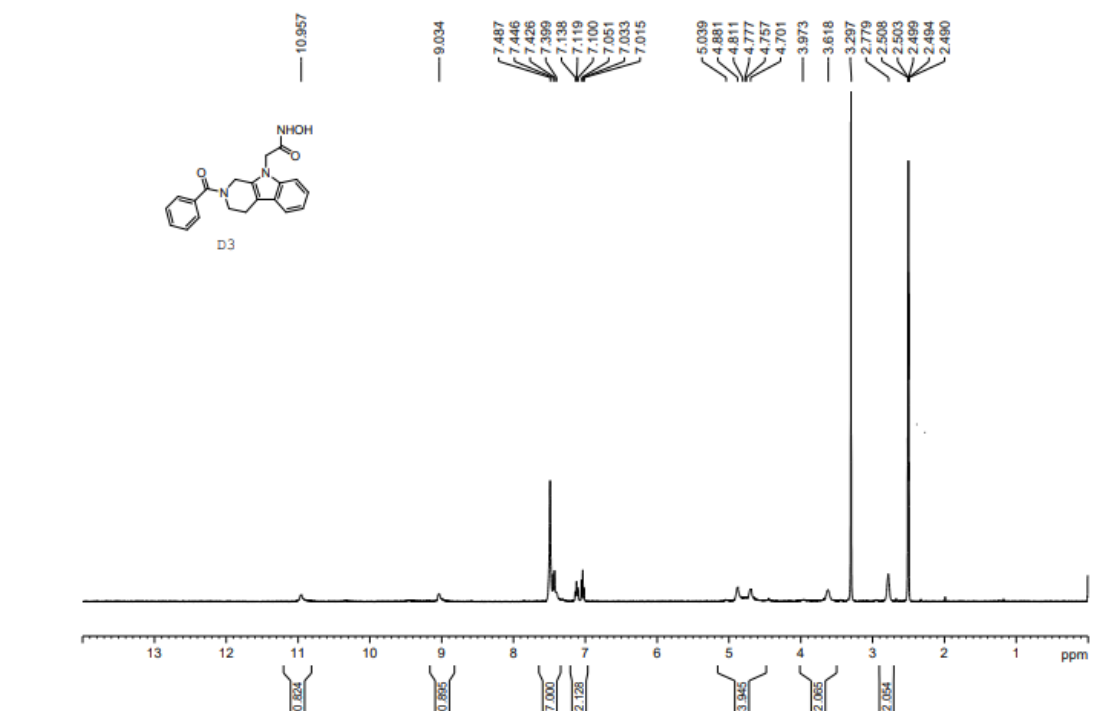

<sup>1</sup>H NMR spectrum of D3

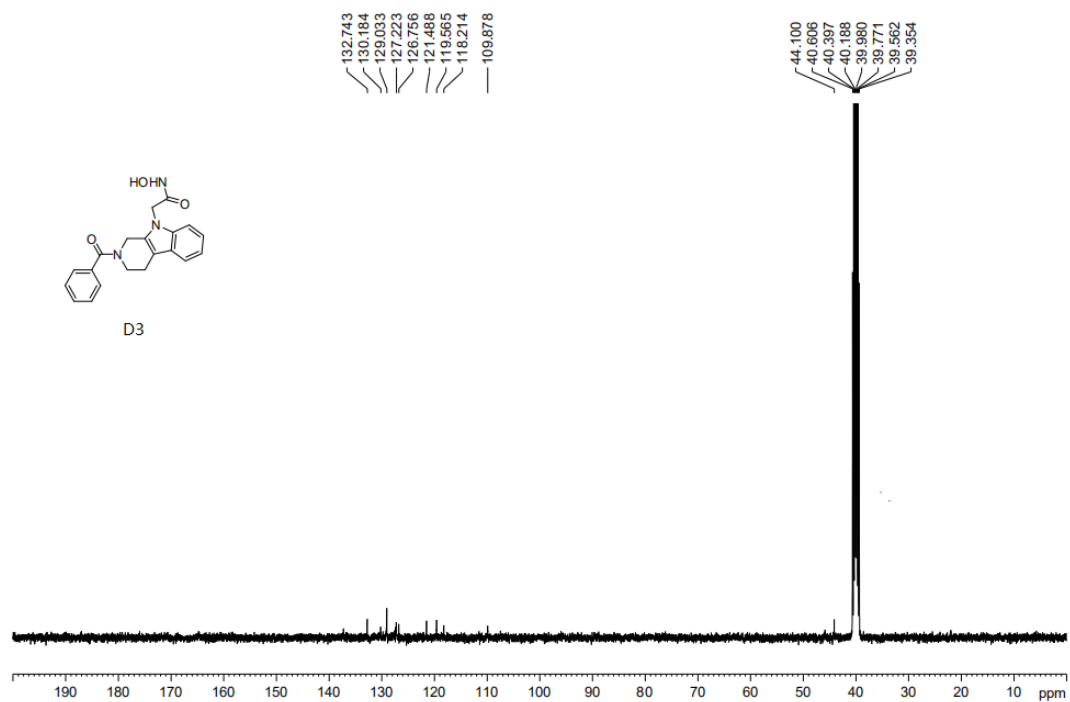

<sup>13</sup>C NMR spectrum of D3

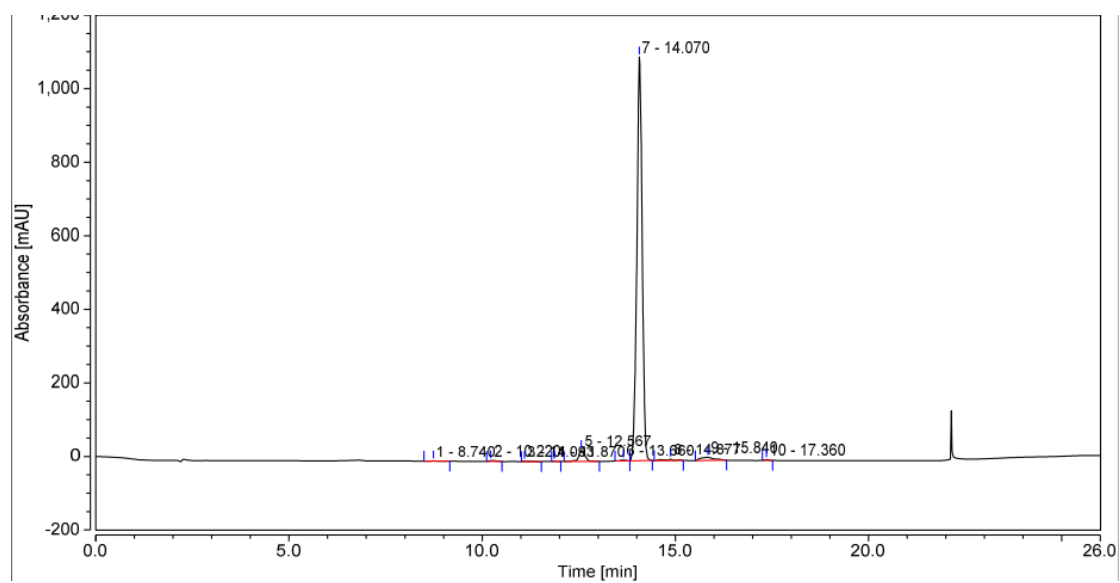

HPLC spectrum of D3

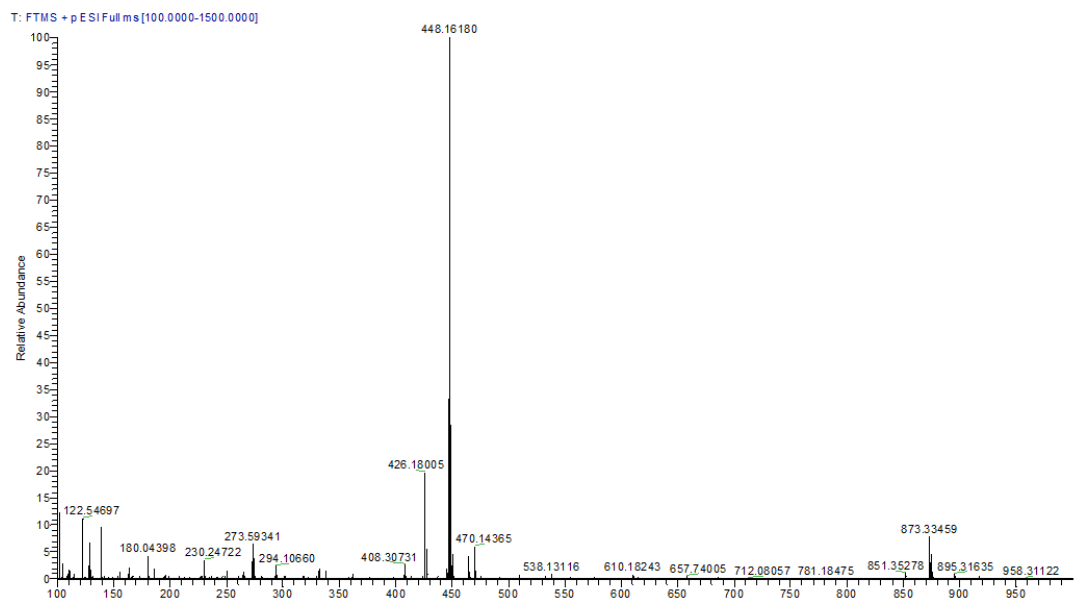

HRMS spectrum of D4

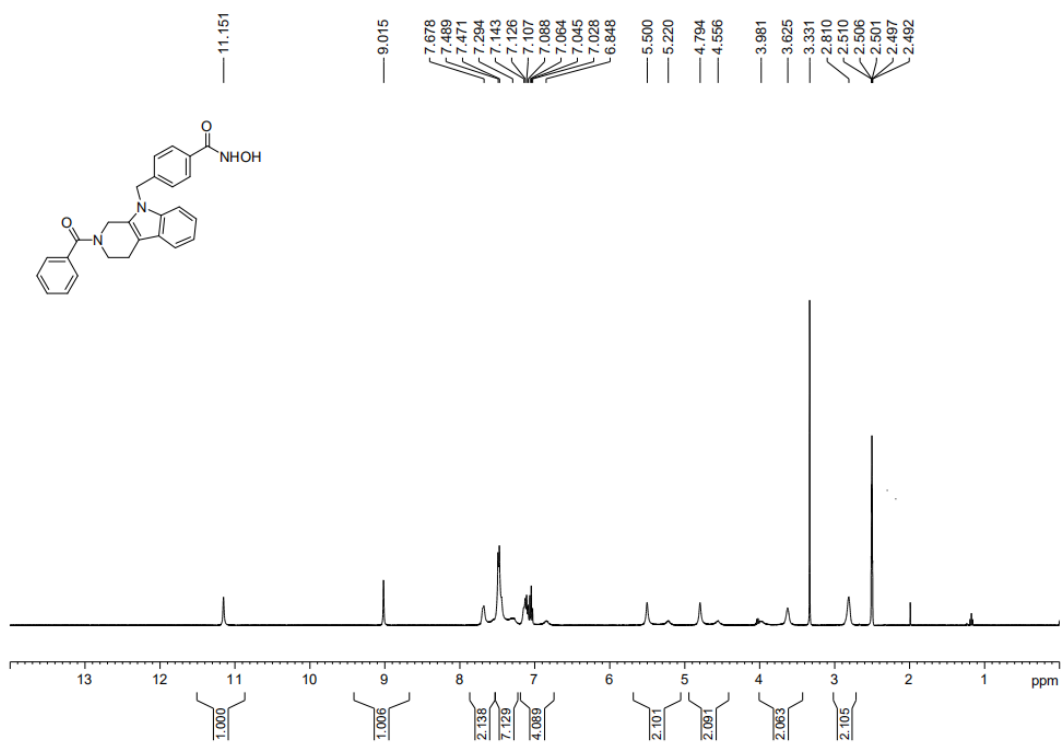

<sup>1</sup>H NMR spectrum of D4

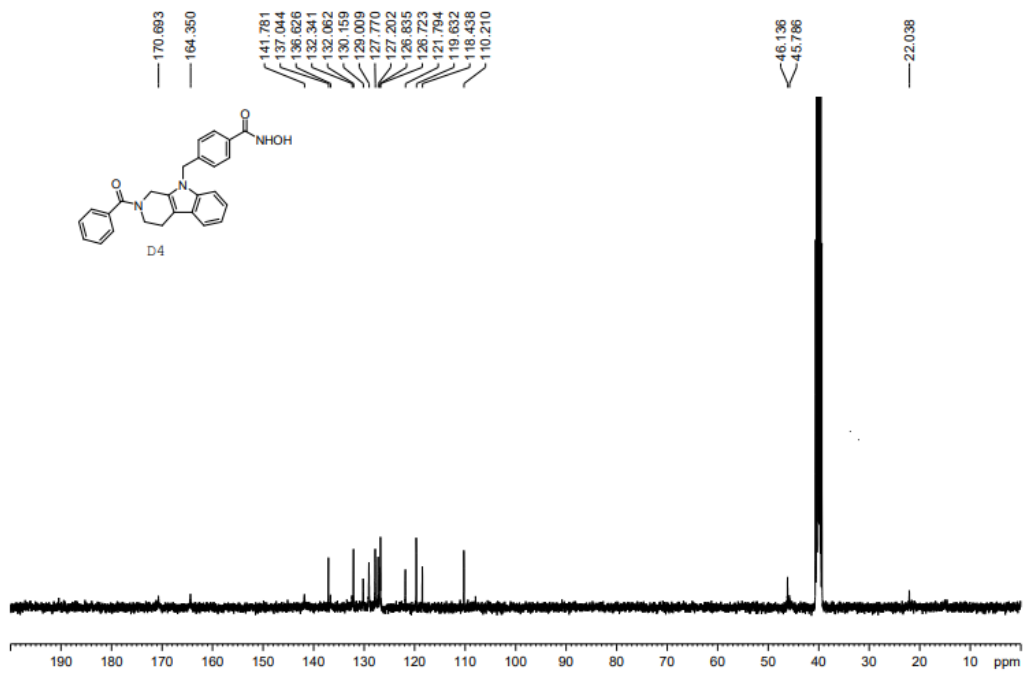

<sup>13</sup>C NMR spectrum of D4

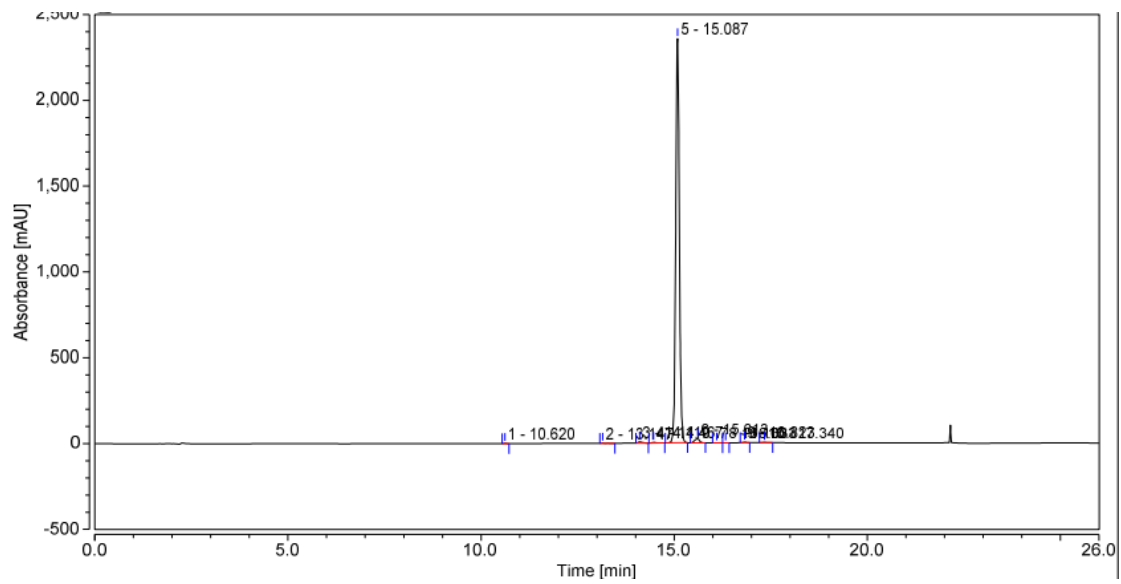

HPLC spectrum of D4

T: FTMS + pESI Full ms [100.0000-1500.0000]

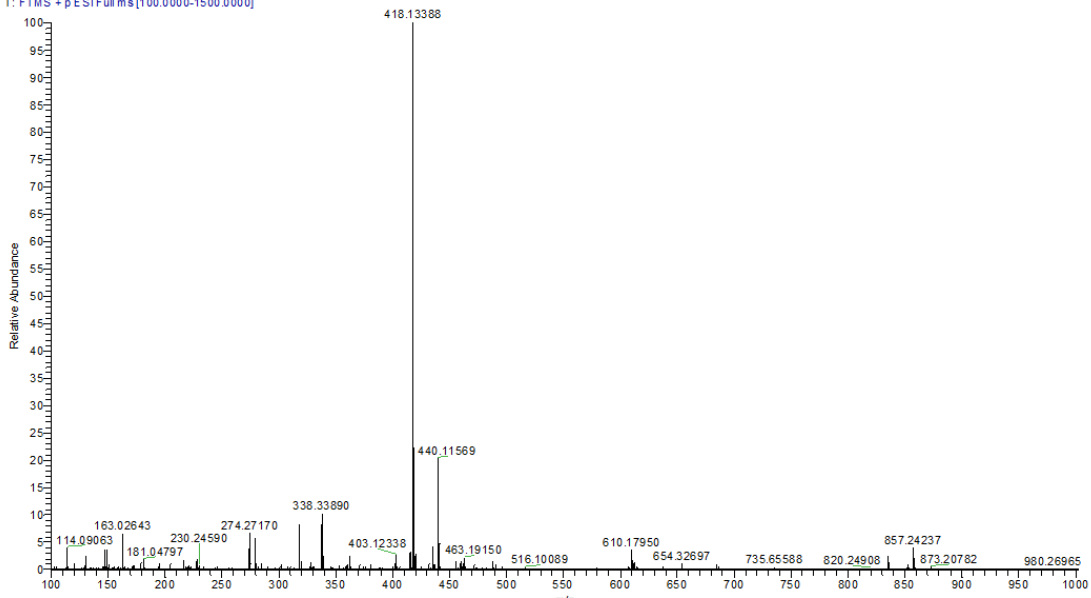

HRMS spectrum of D5

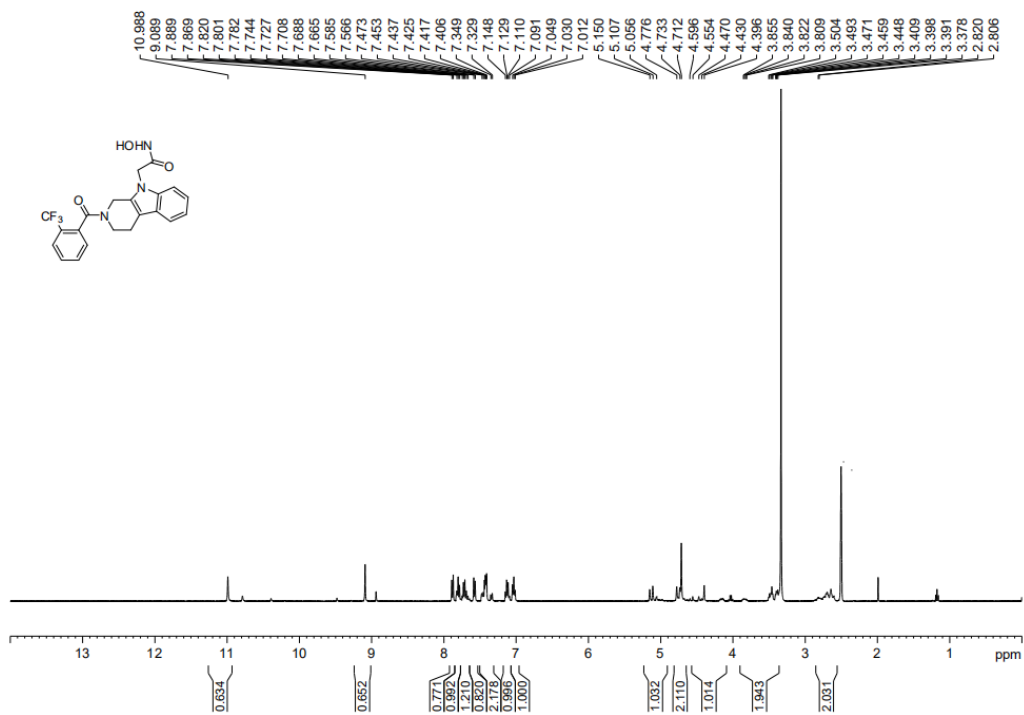

<sup>1</sup>H NMR spectrum of D5

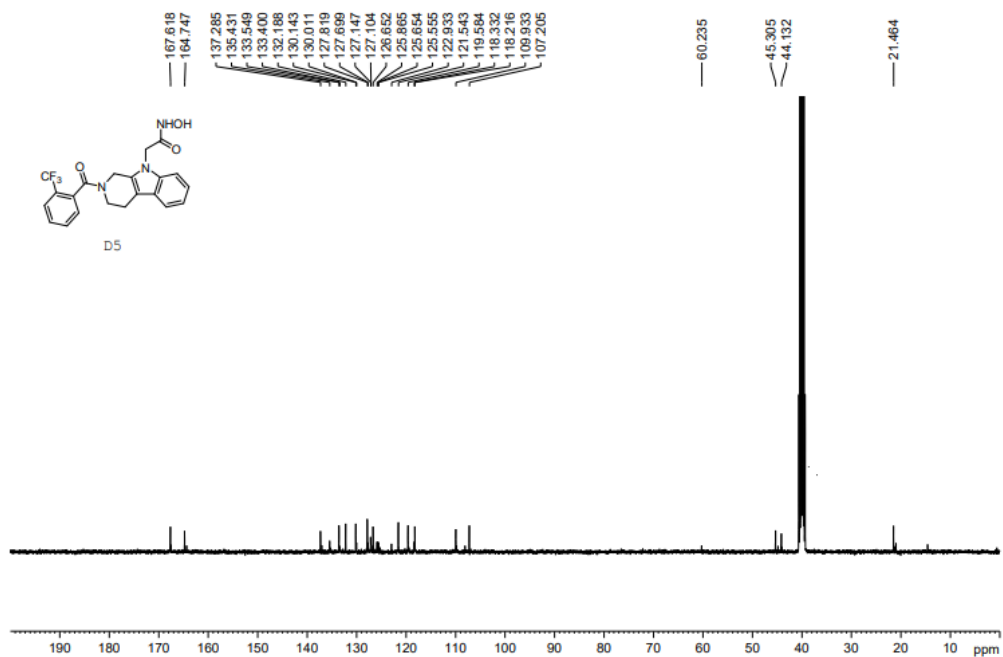

$^{13}\text{C}$  NMR spectrum of **D5**

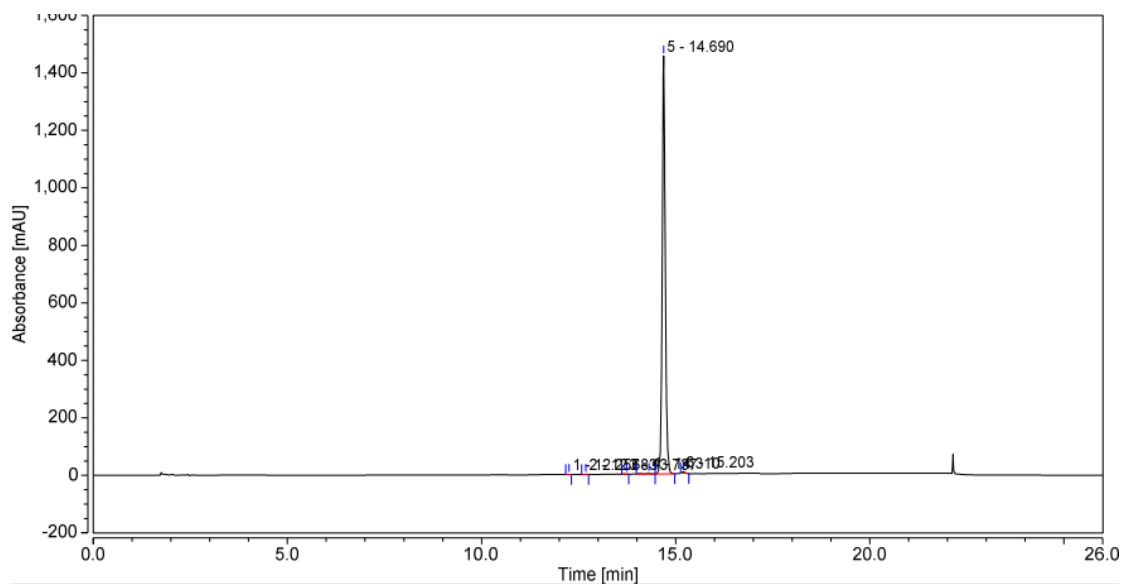

HPLC spectrum of **D5**

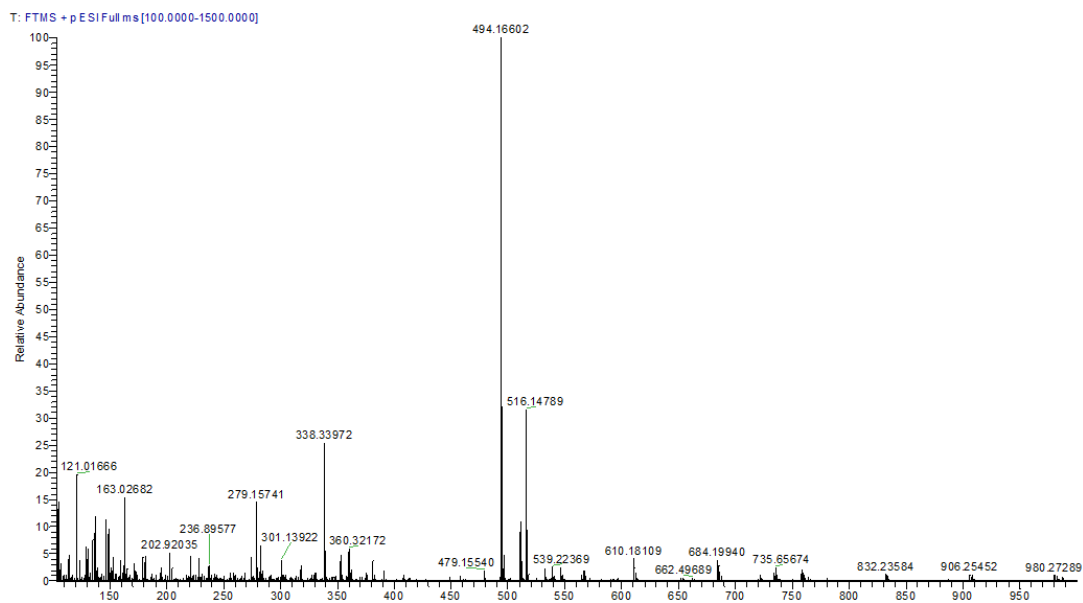

HRMS spectrum of D6

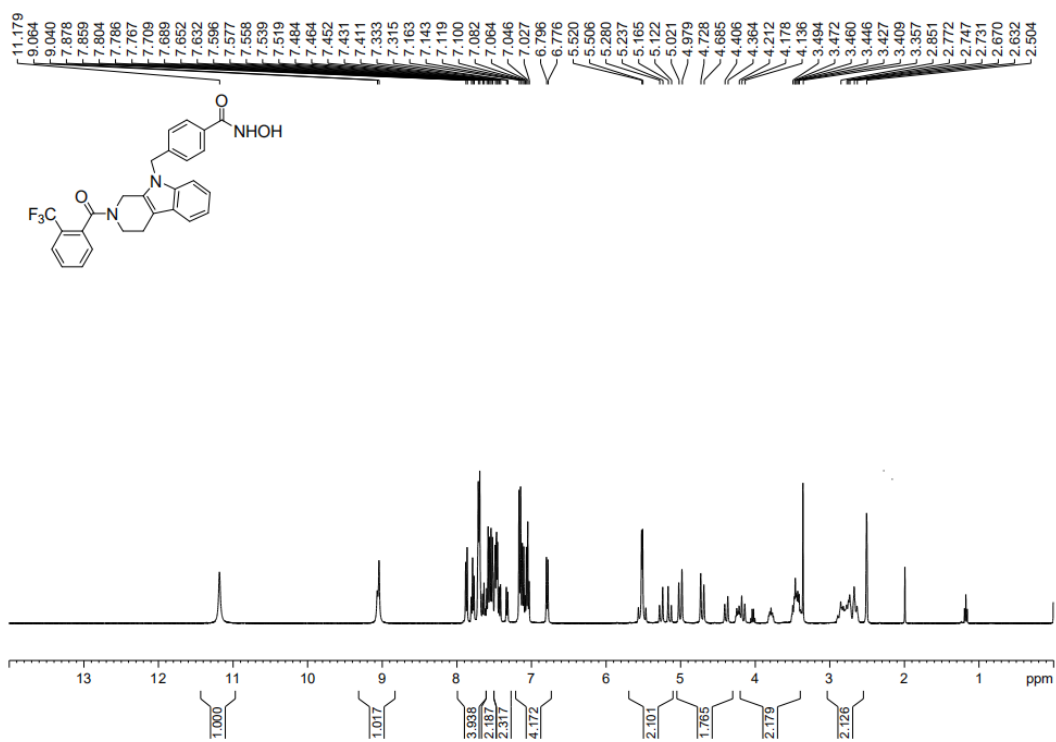

<sup>1</sup>H NMR spectrum of D6

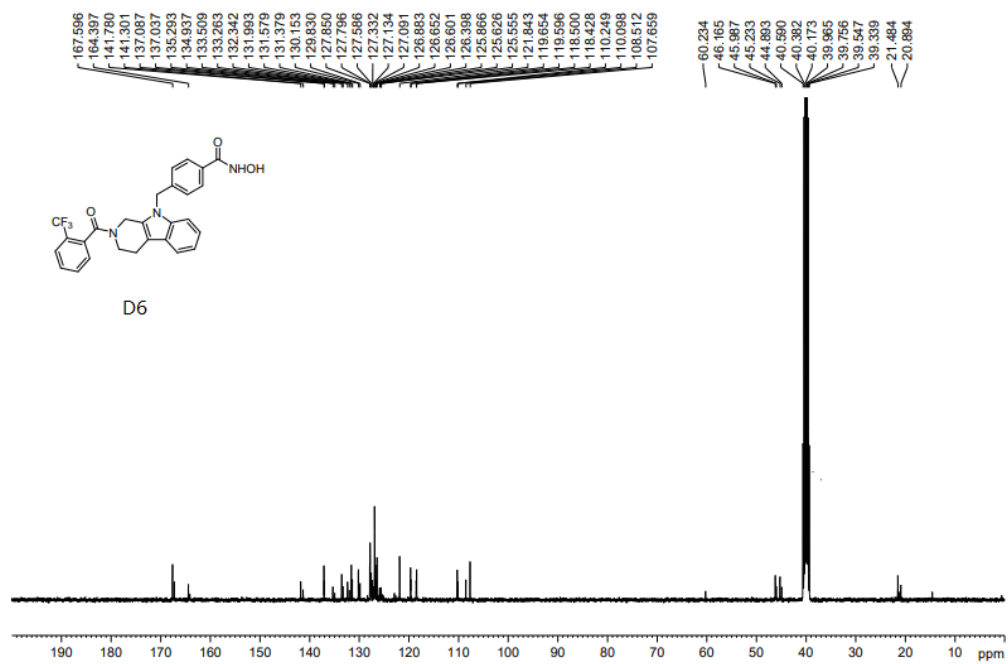

$^{13}\text{C}$  NMR spectrum of **D6**

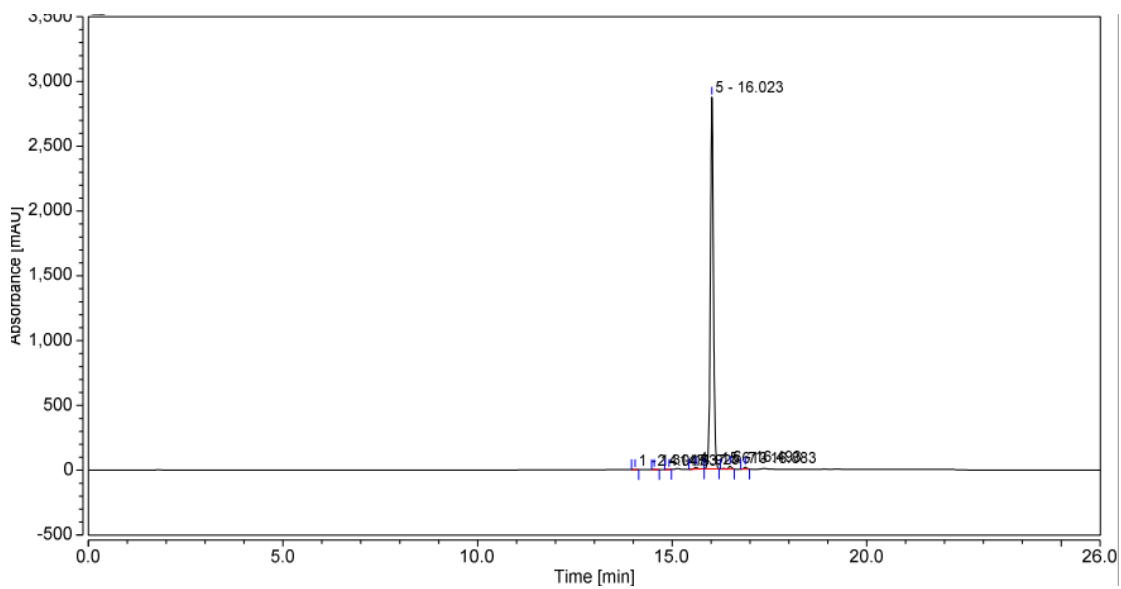

HPLC spectrum of **D6**



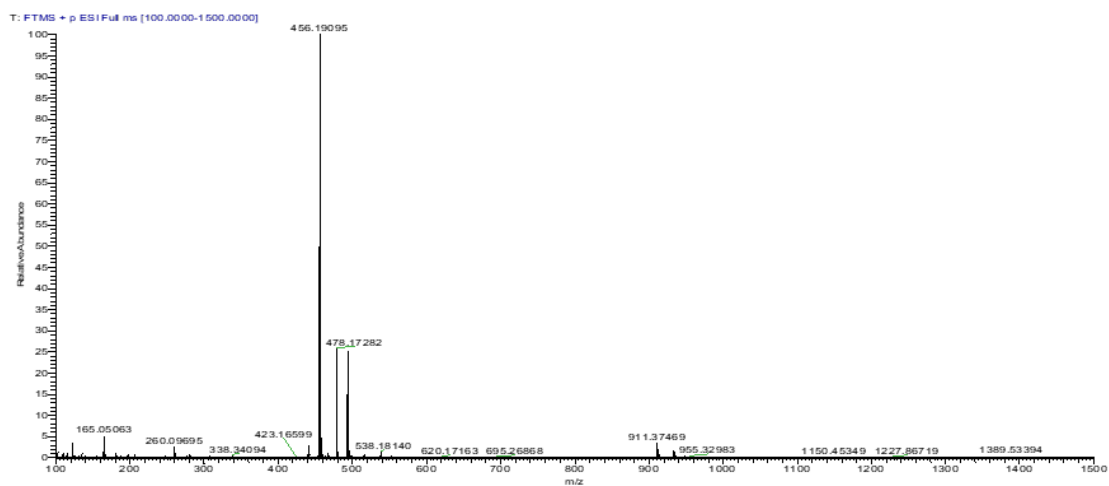

HRMS spectrum of **D7**

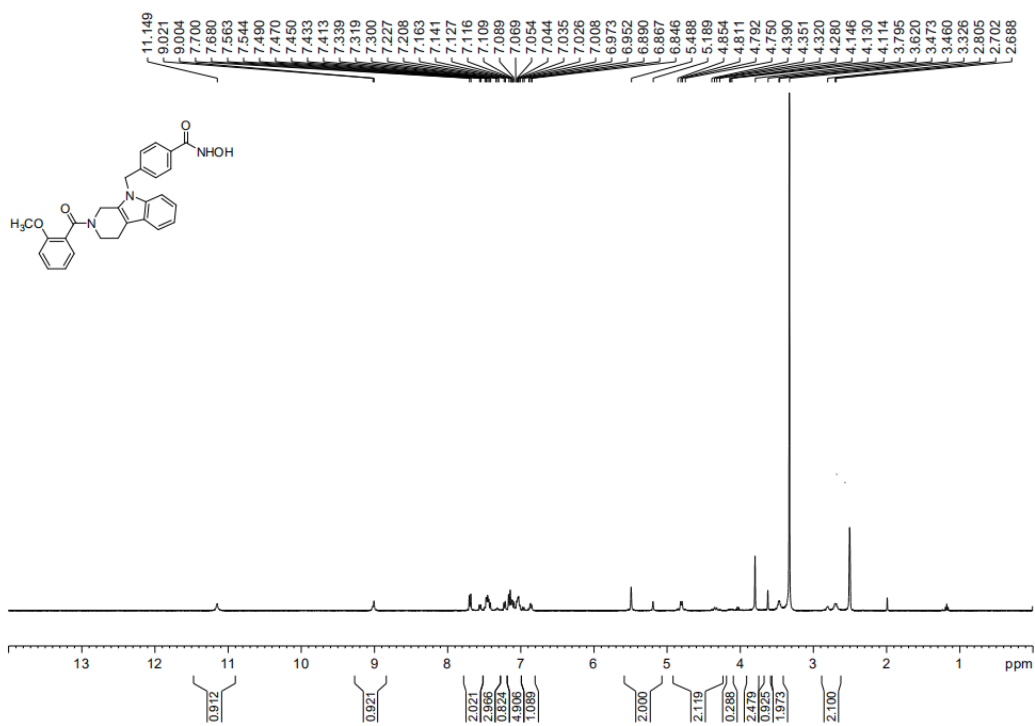

$^1\text{H}$  NMR spectrum of **D7**

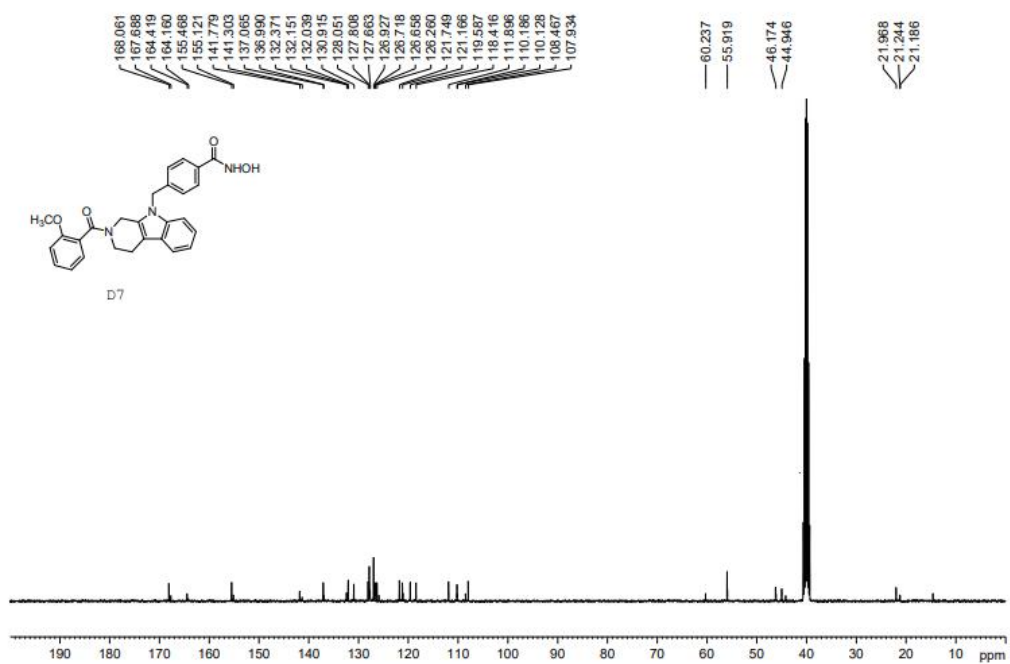

$^{13}\text{C}$  NMR spectrum of **D7**

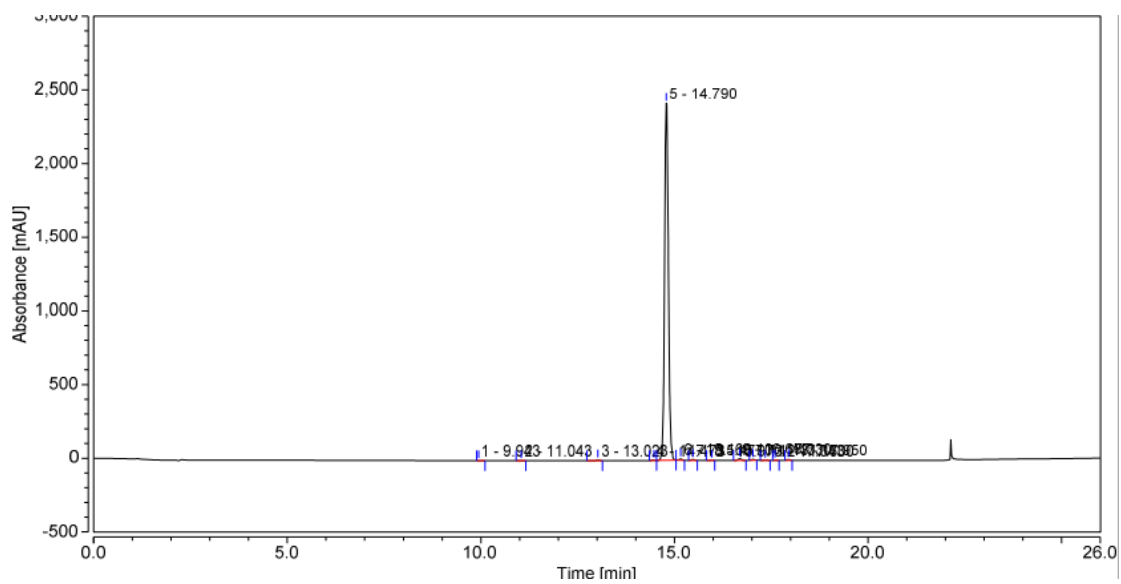

HPLC spectrum of **D7**

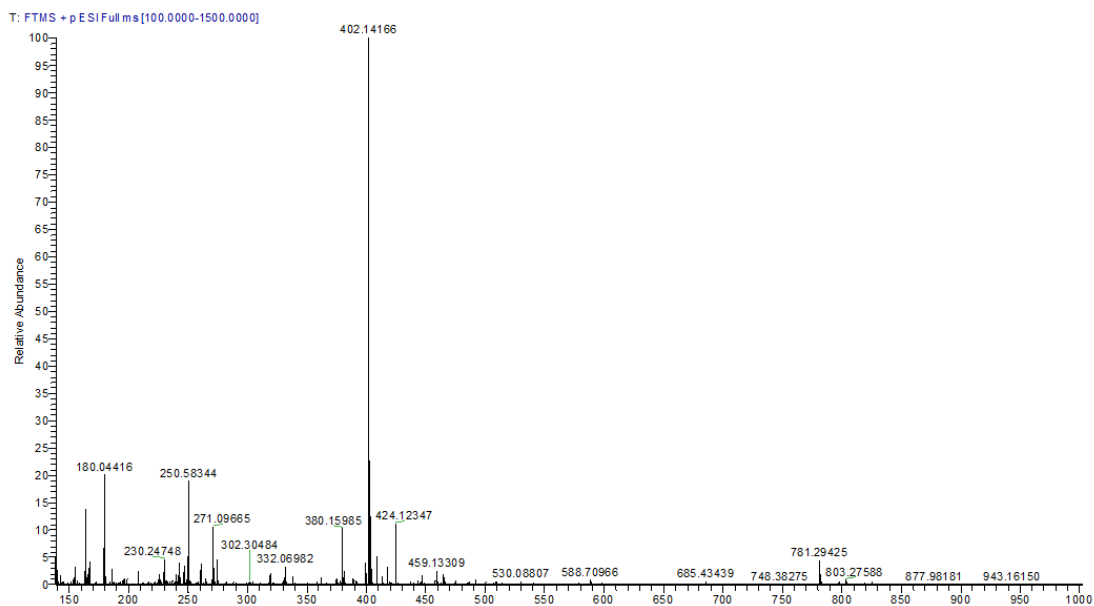

HRMS spectrum of **D8**

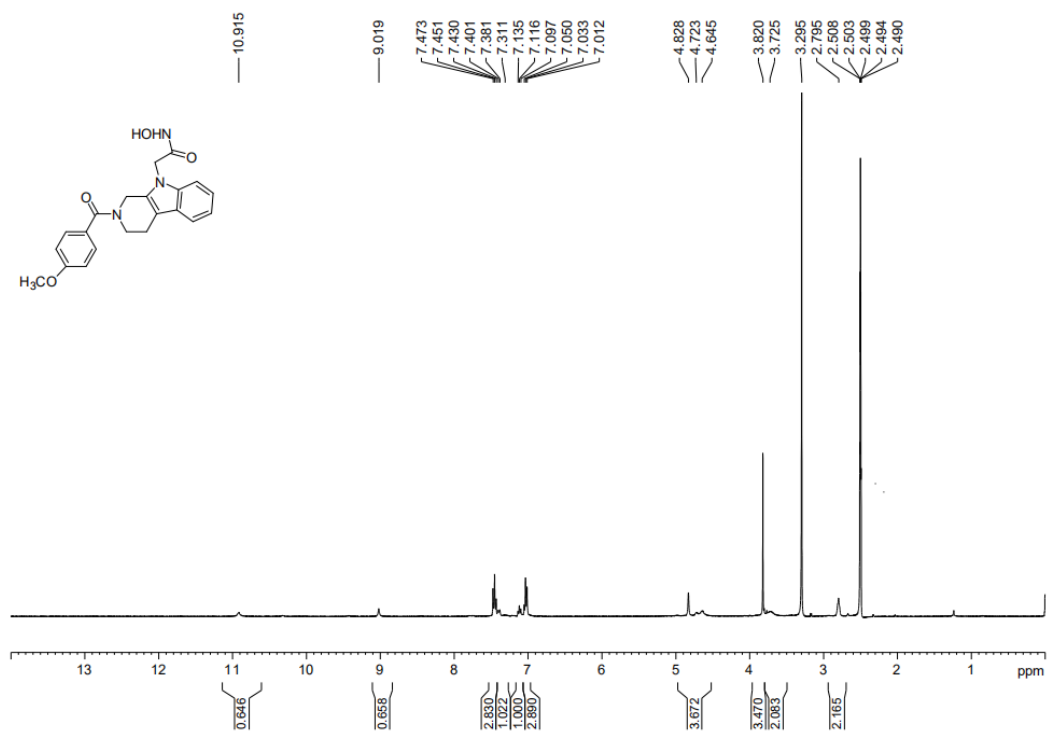

$^1\text{H}$  NMR spectrum of **D8**

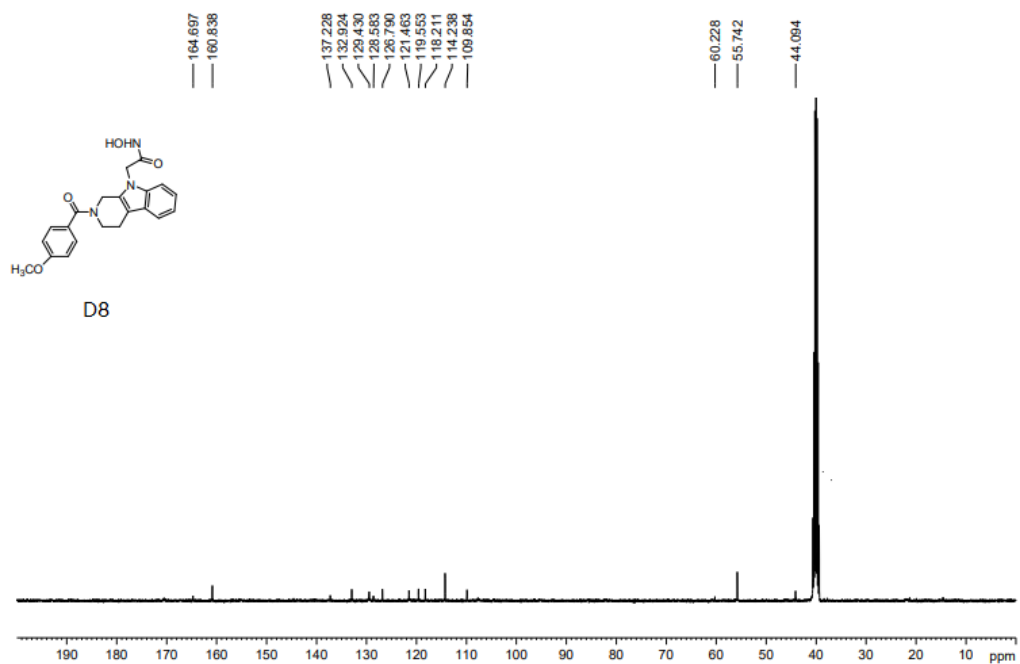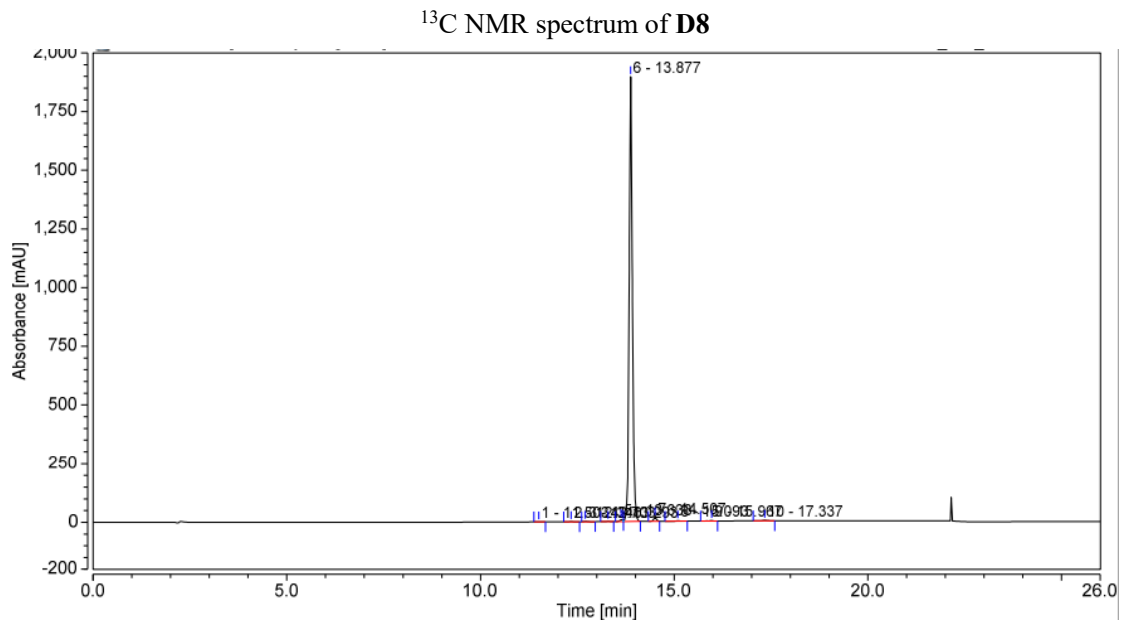

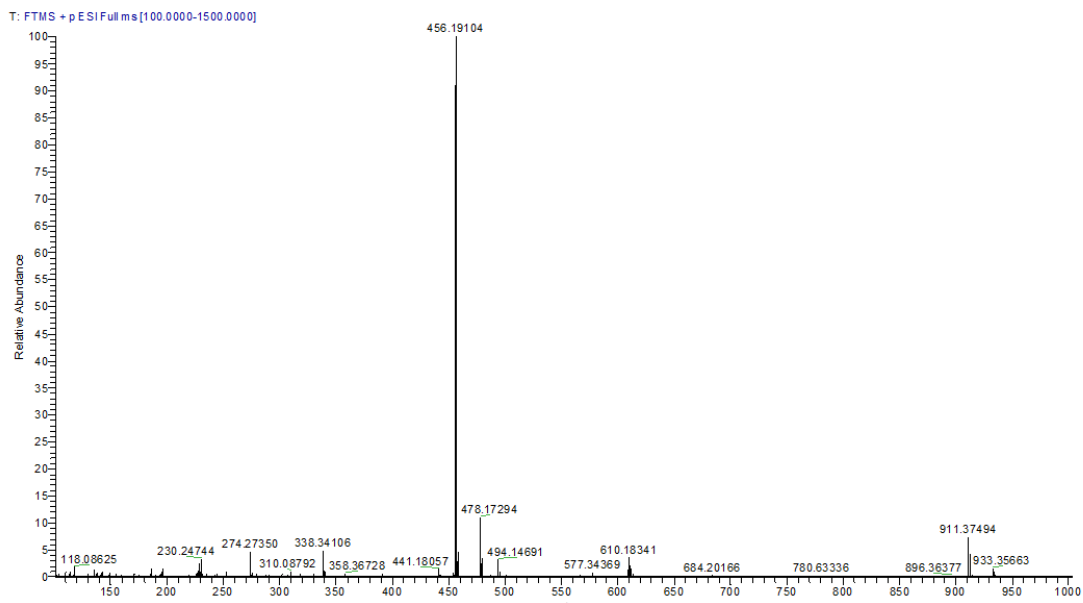

HRMS spectrum of **D9**

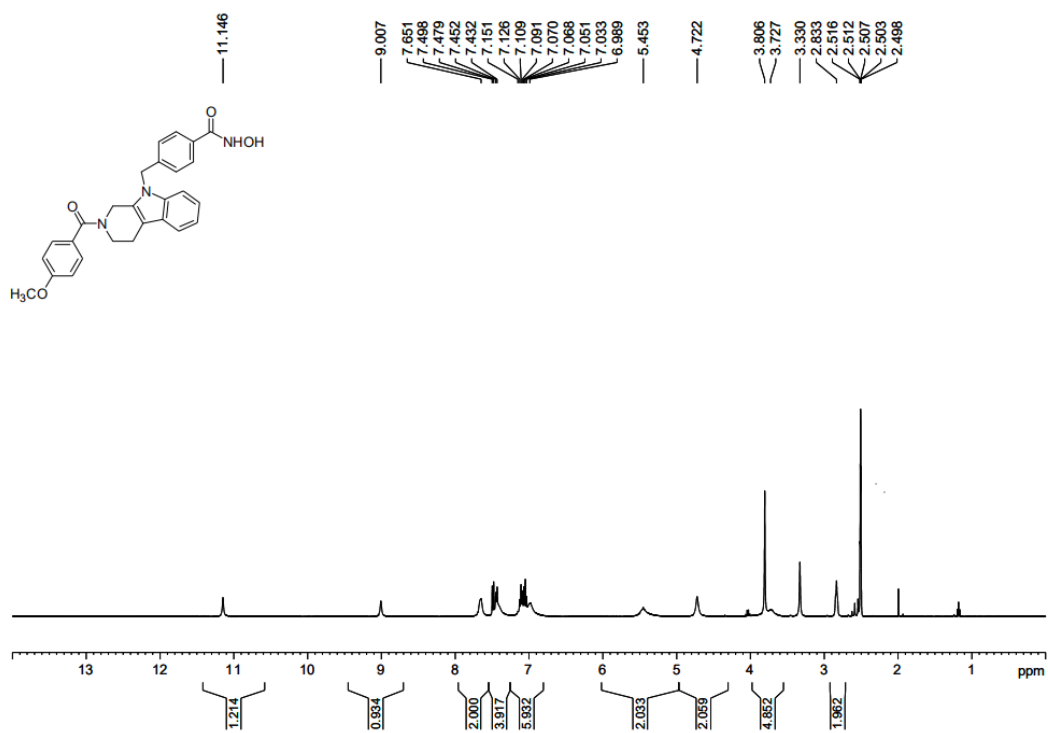

$^1\text{H}$  NMR spectrum of **D9**

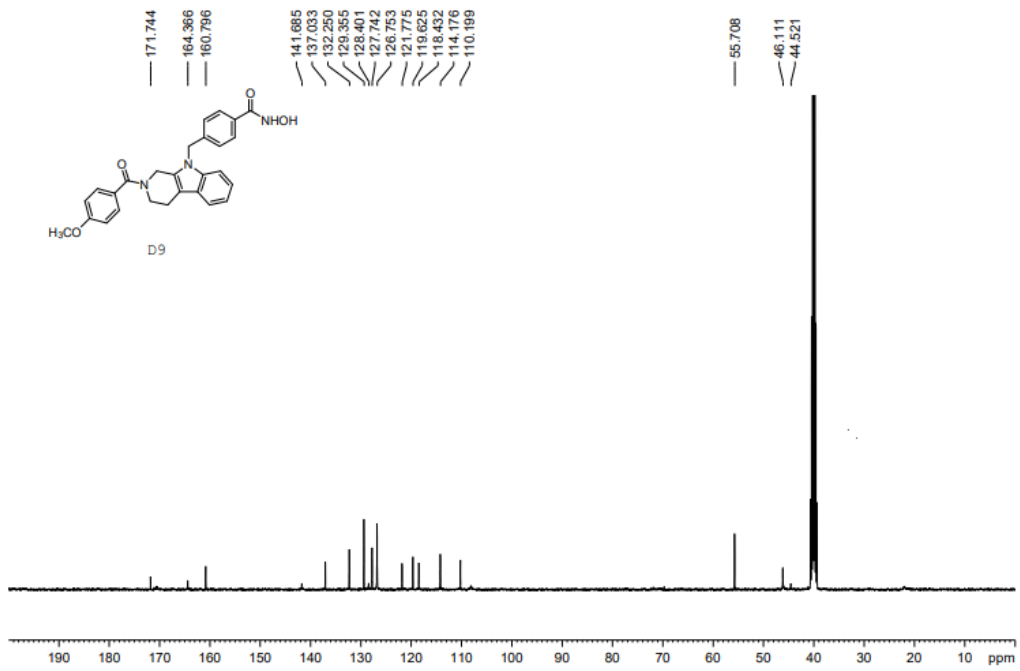

<sup>13</sup>C NMR spectrum of **D9**

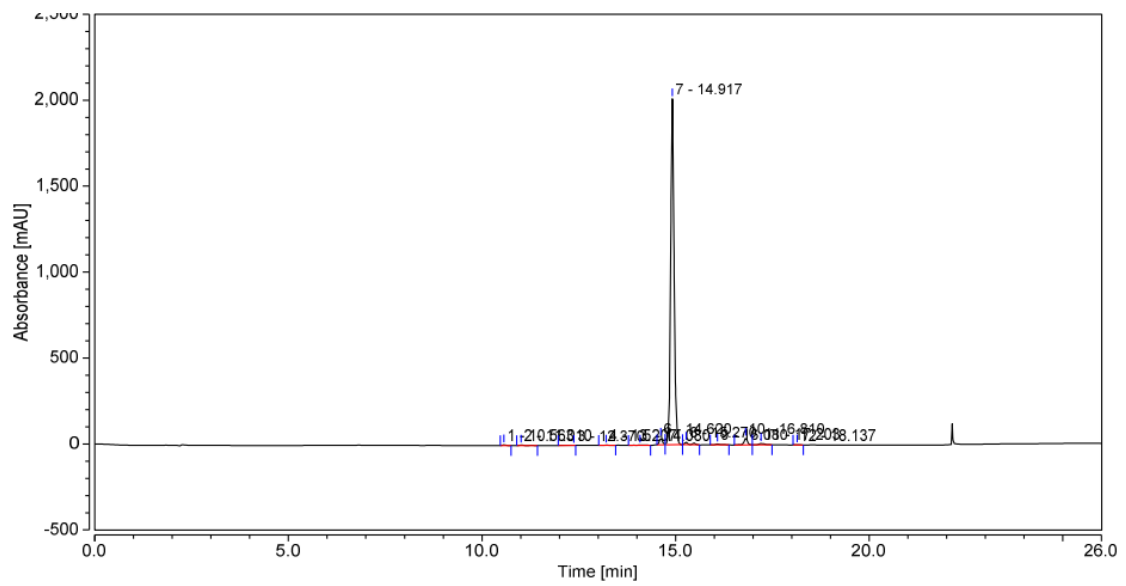

HPLC spectrum of **D9**

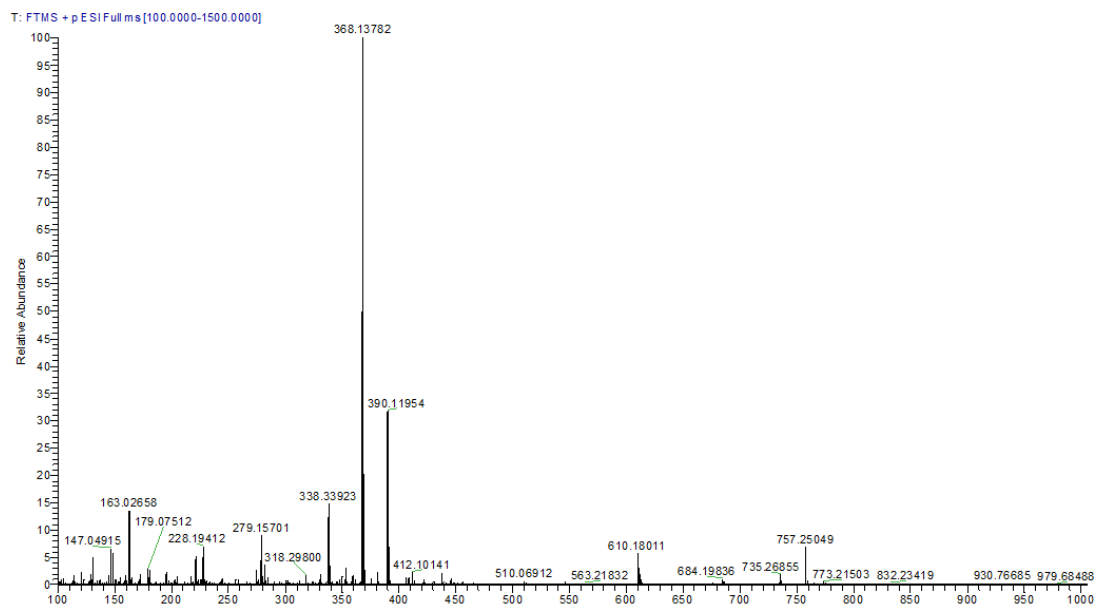

HRMS spectrum of **D10**

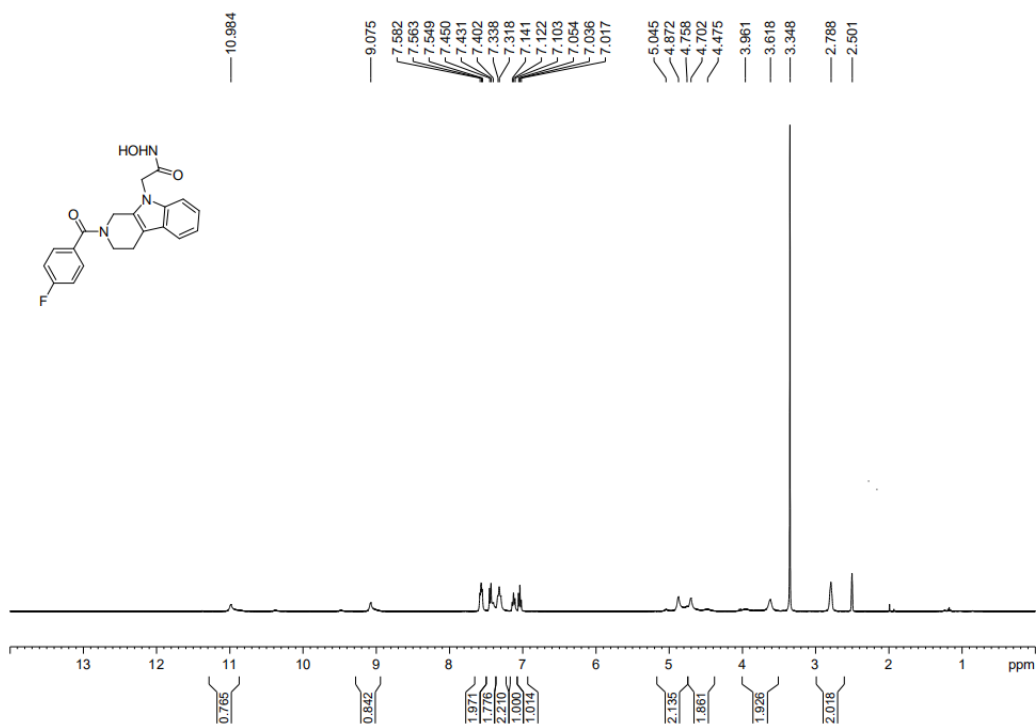

<sup>1</sup>H NMR spectrum of **D10**

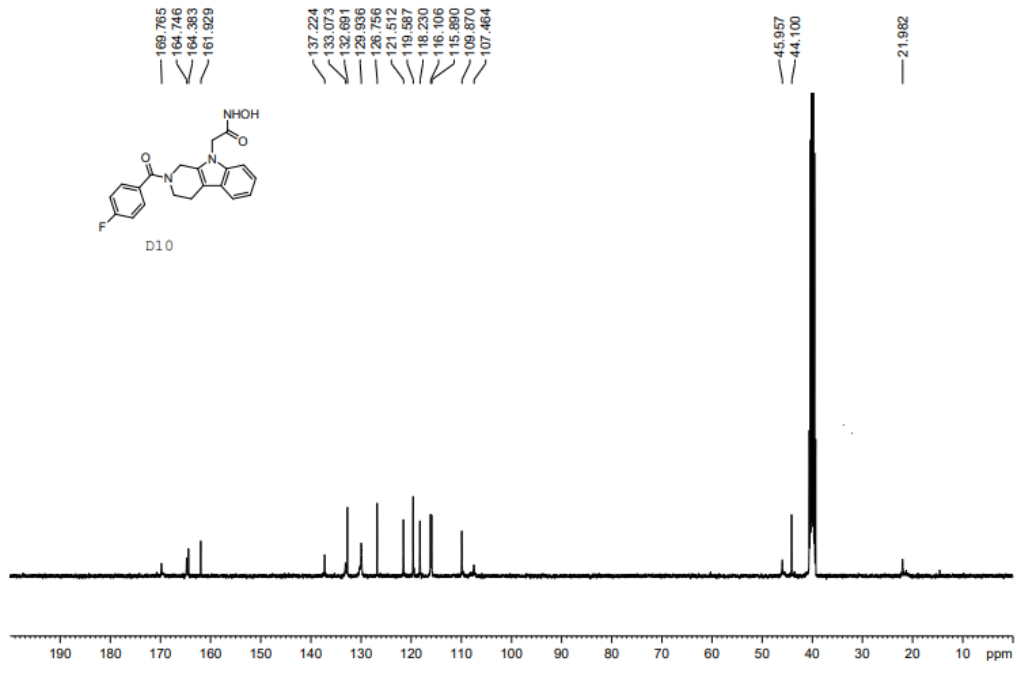

<sup>13</sup>C NMR spectrum of **D10**

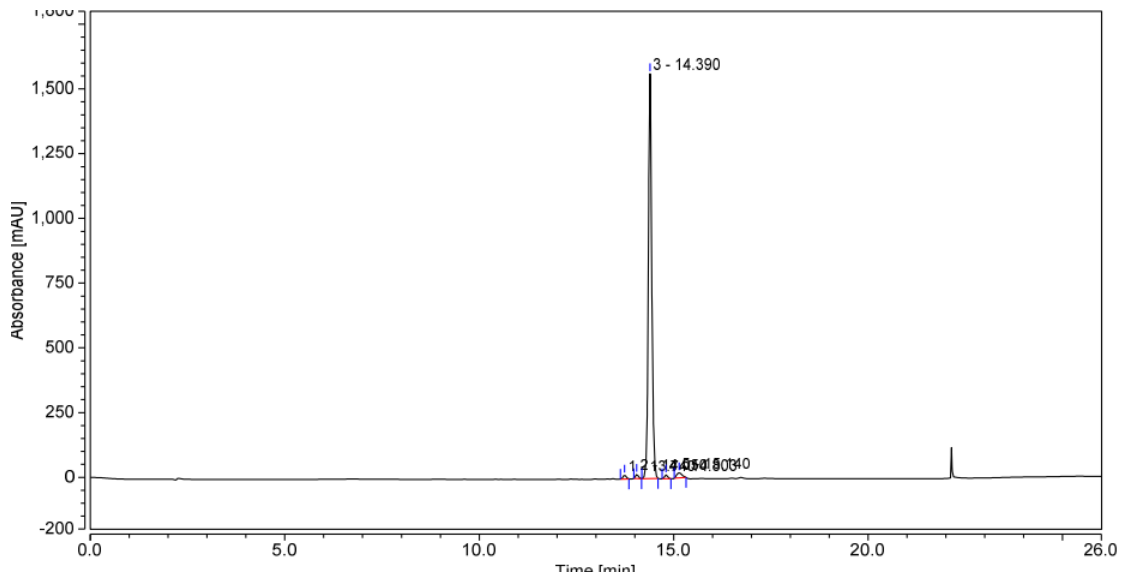

HPLC spectrum of **D10**



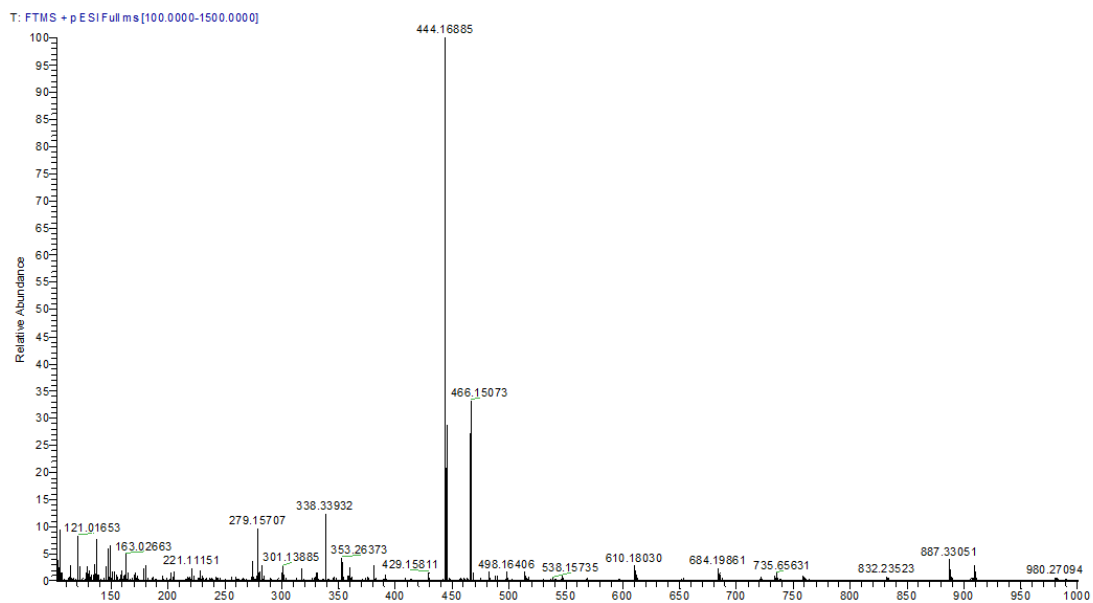

HRMS spectrum of D11

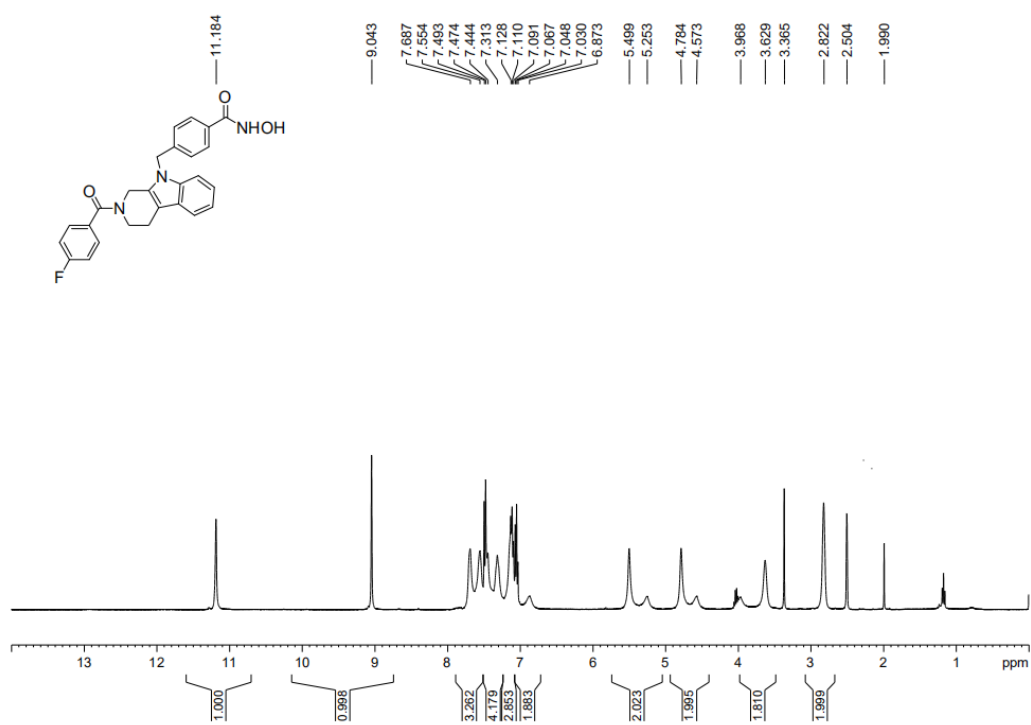

<sup>1</sup>H NMR spectrum of D11

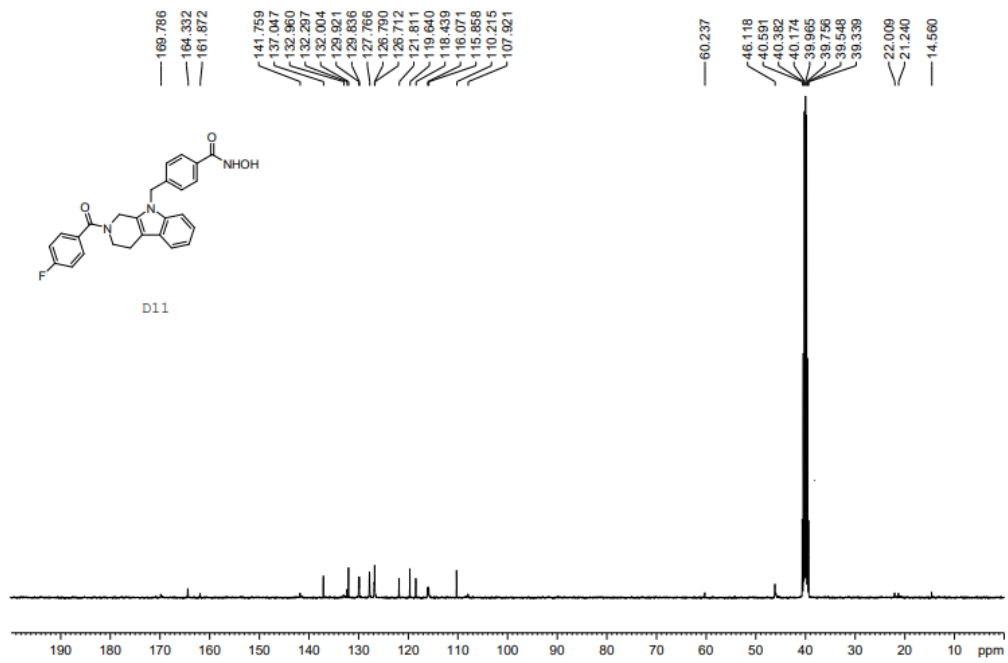

<sup>13</sup>C NMR spectrum of D11

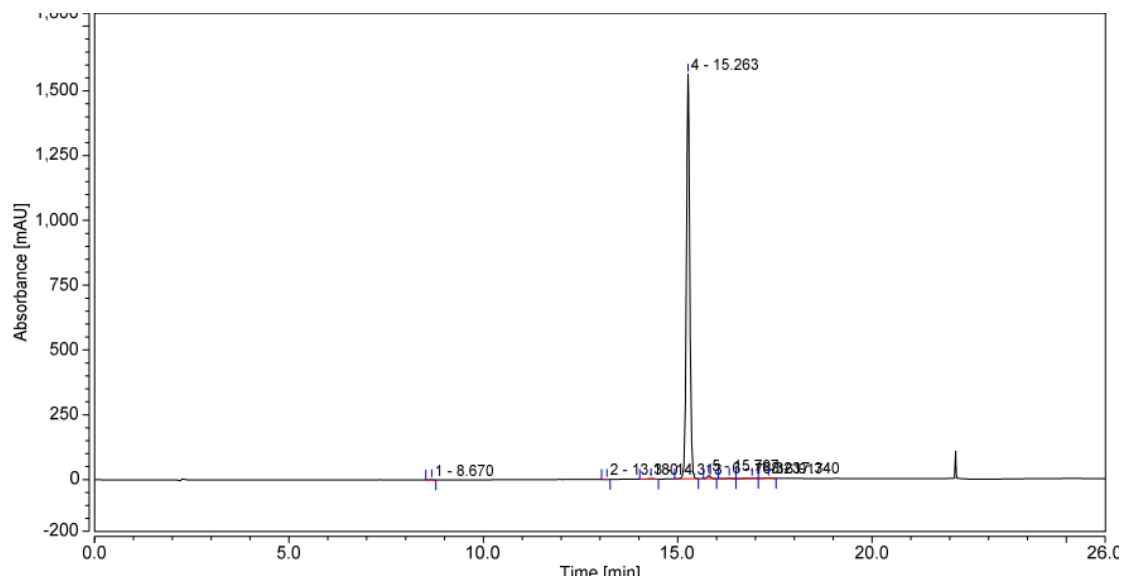

HPLC spectrum of D11

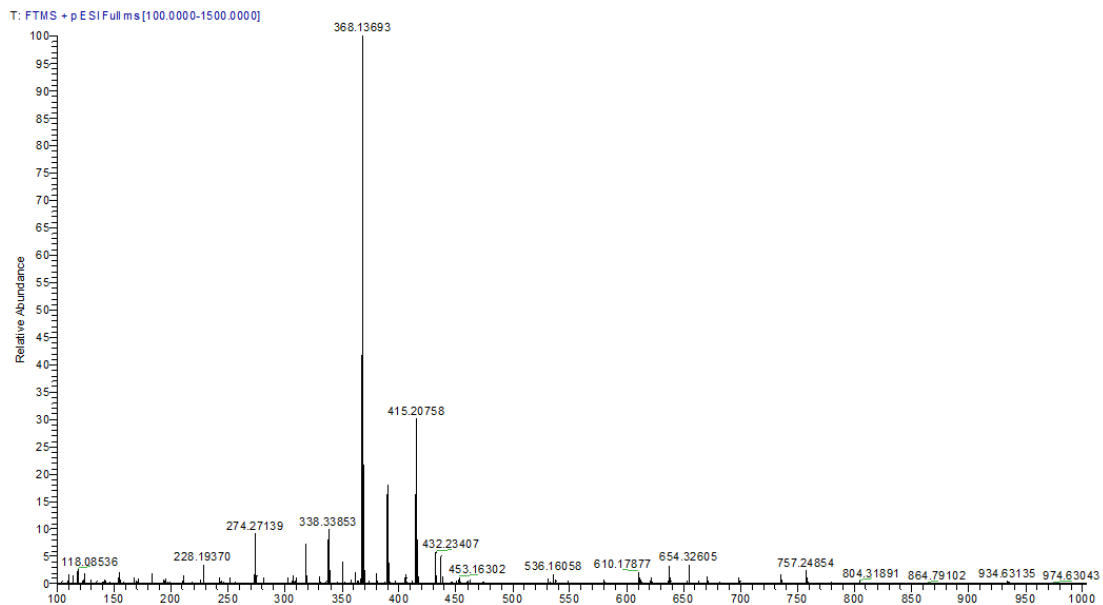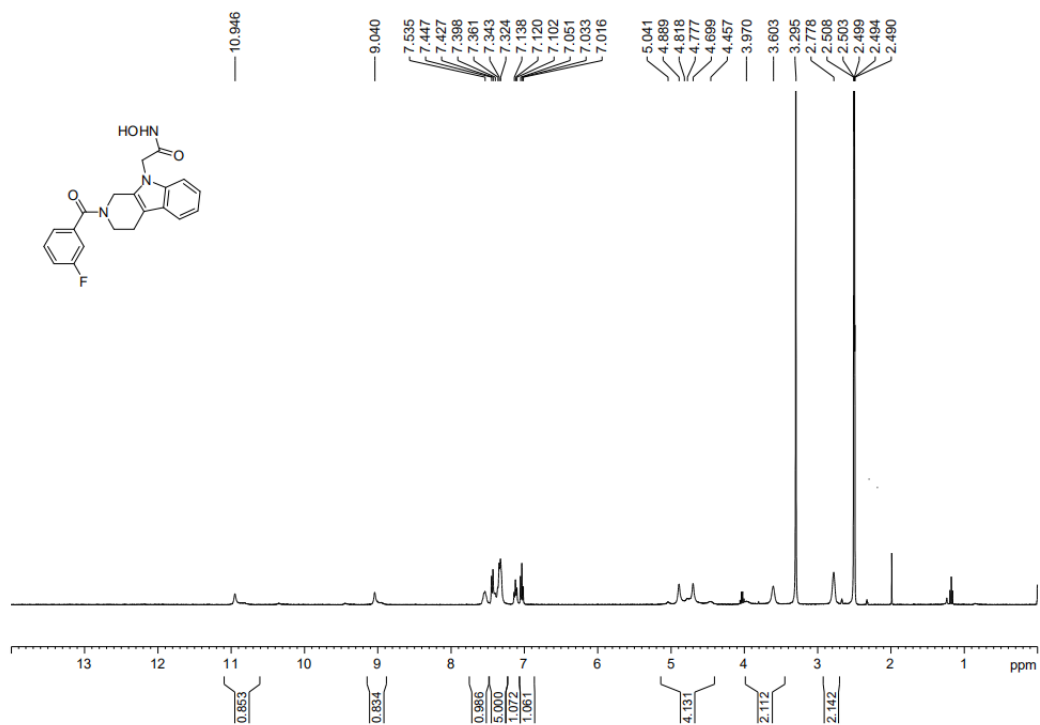

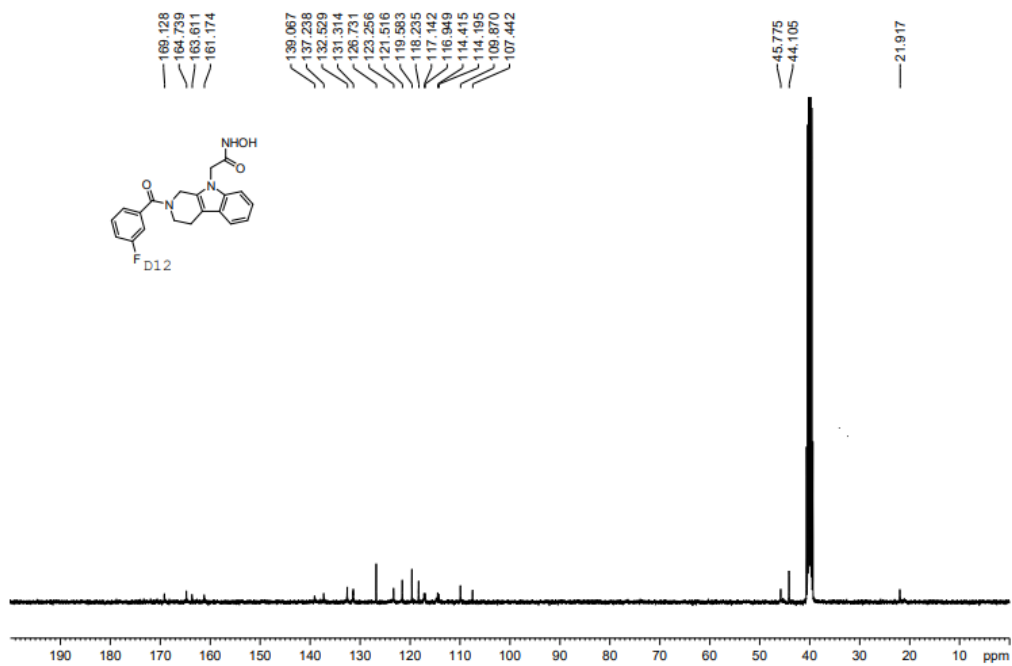

<sup>13</sup>C NMR spectrum of **D12**

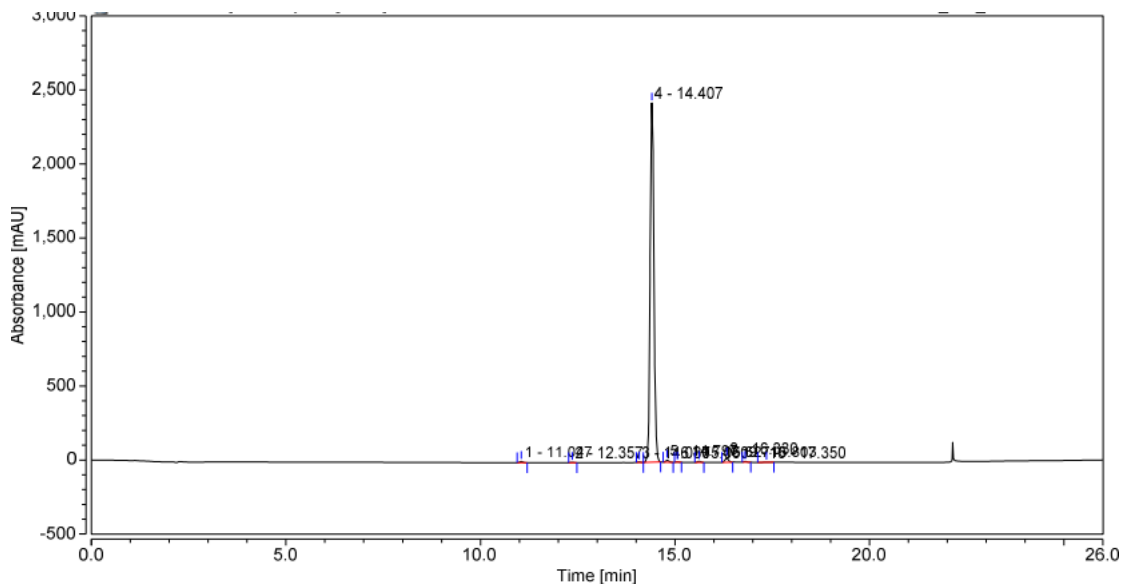

HPLC spectrum of **D12**

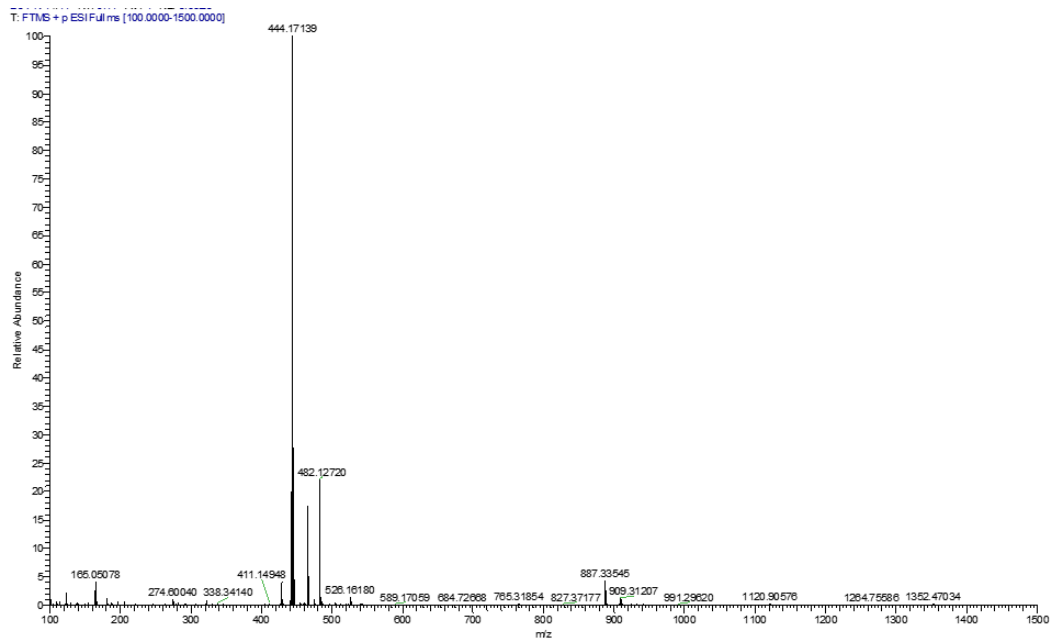

HRMS spectrum of **D13**

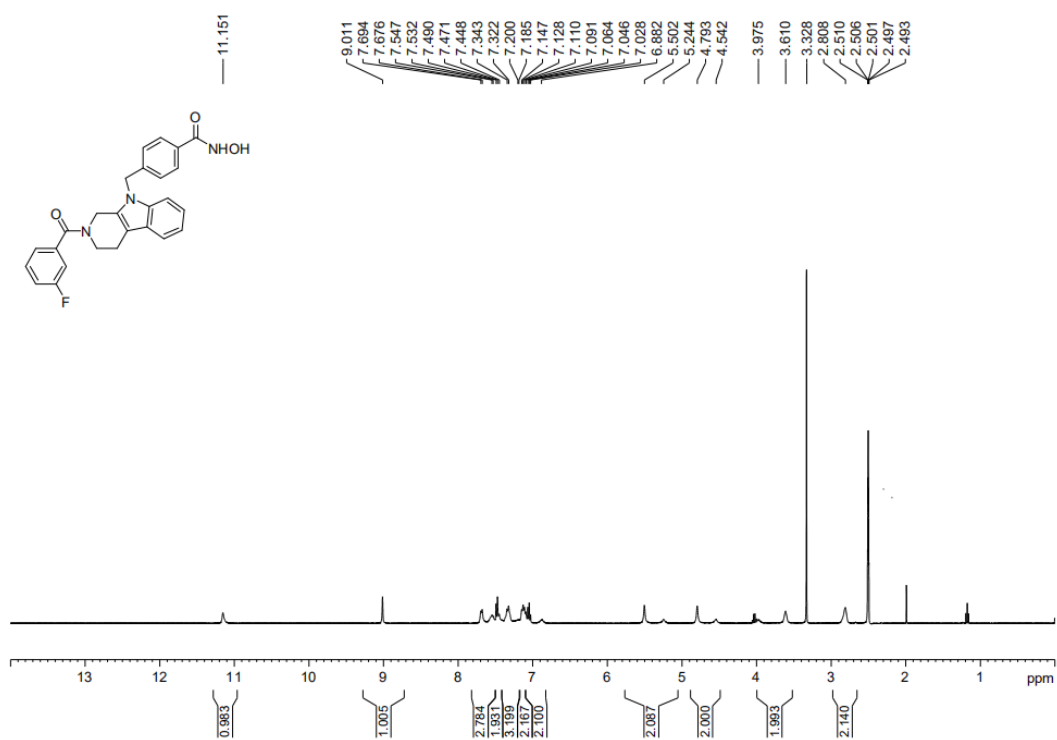

$^1\text{H}$  NMR spectrum of **D13**

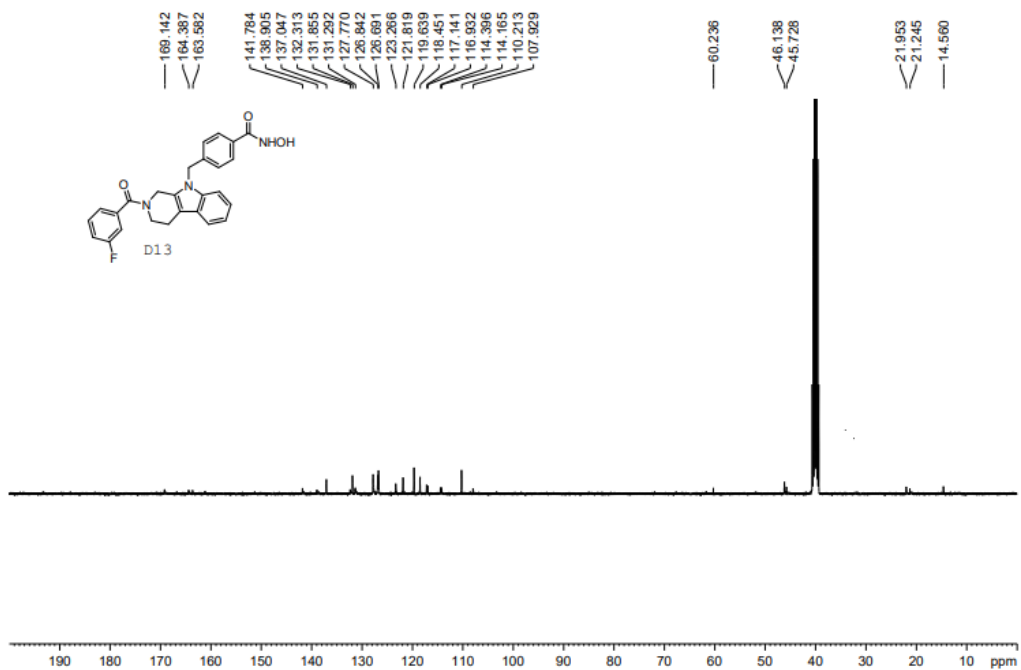

<sup>13</sup>C NMR spectrum of D13

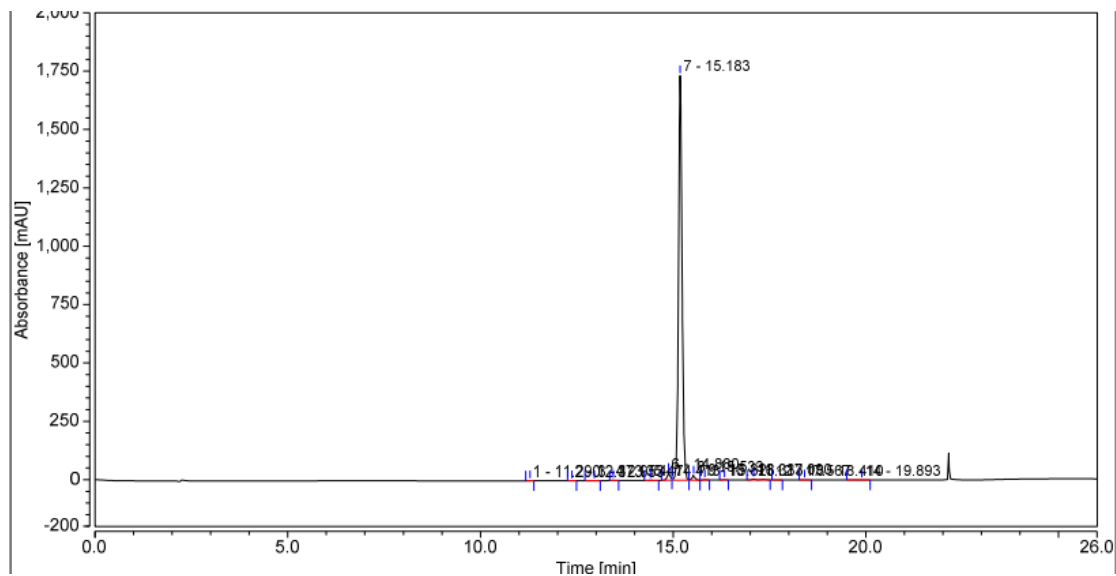

HPLC spectrum of D13

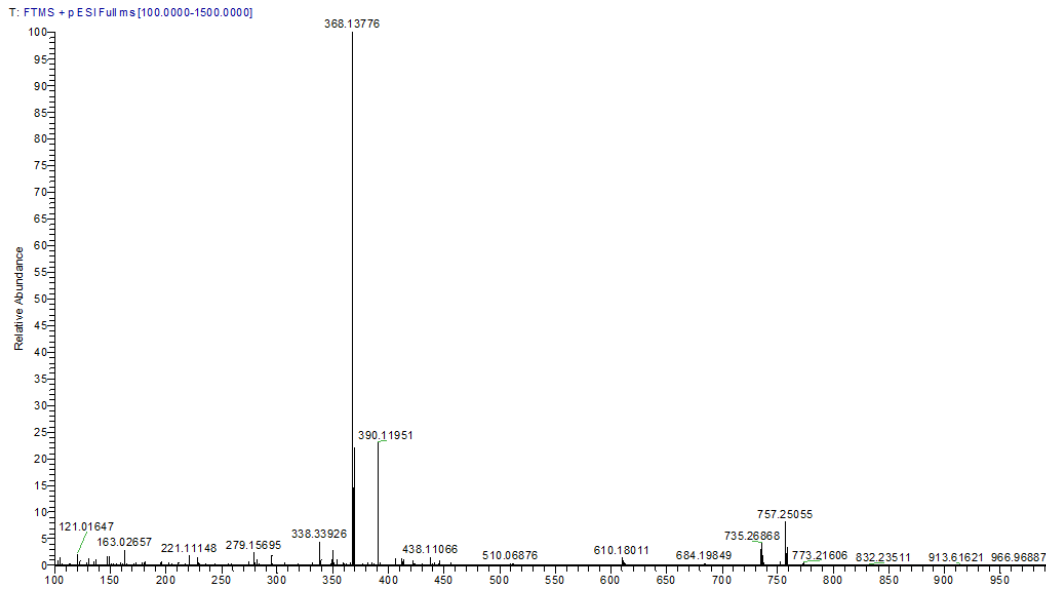

HRMS spectrum of D14

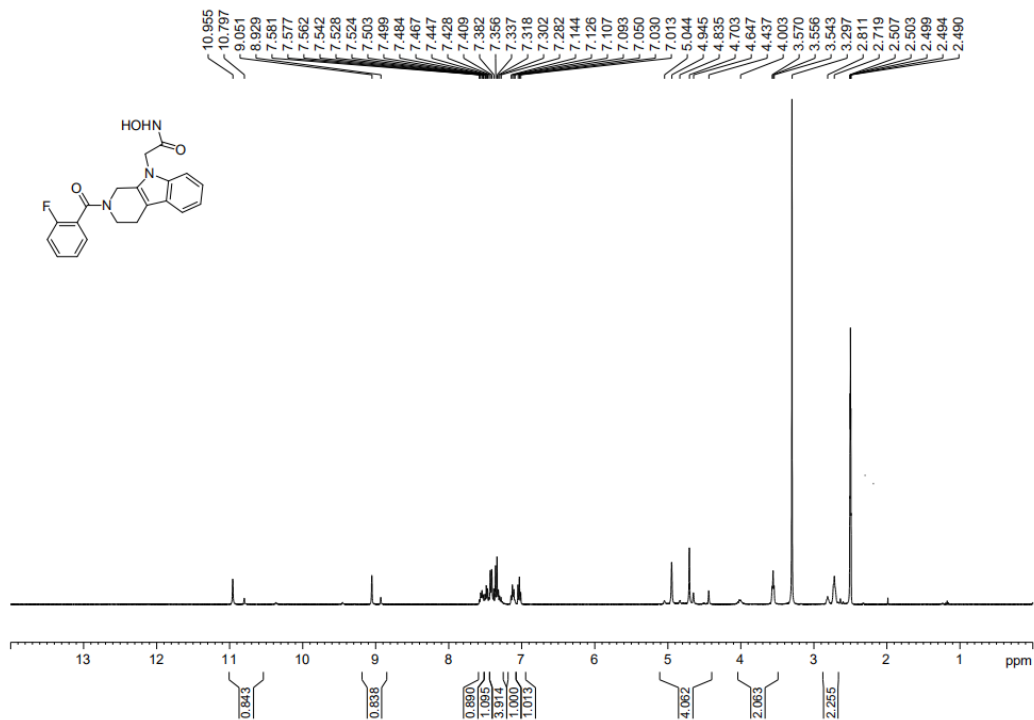

<sup>1</sup>H NMR spectrum of D14

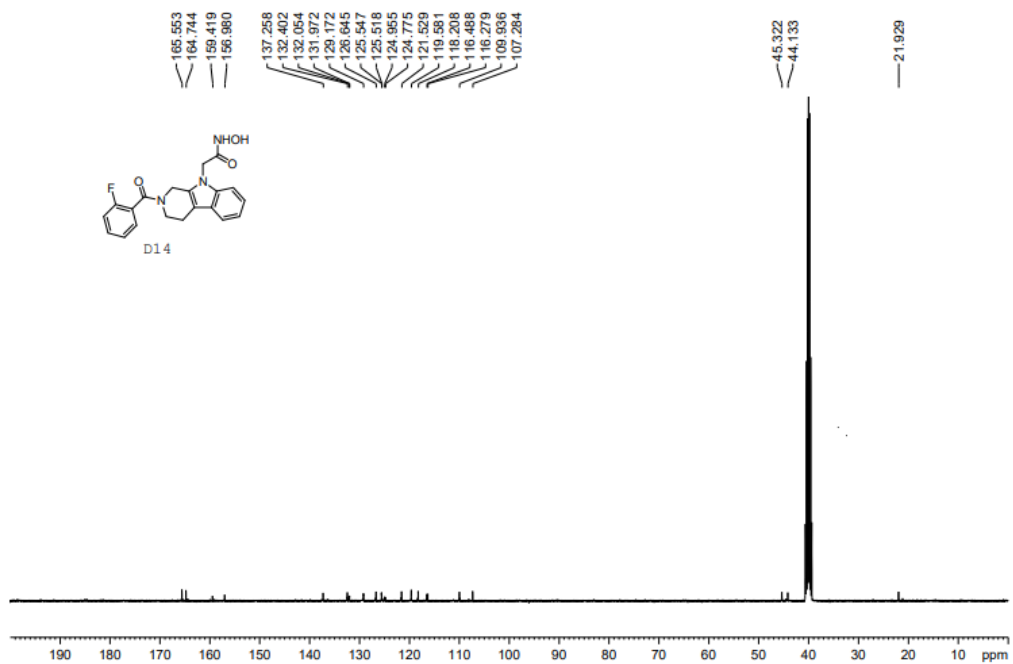

<sup>13</sup>C NMR spectrum of **D14**

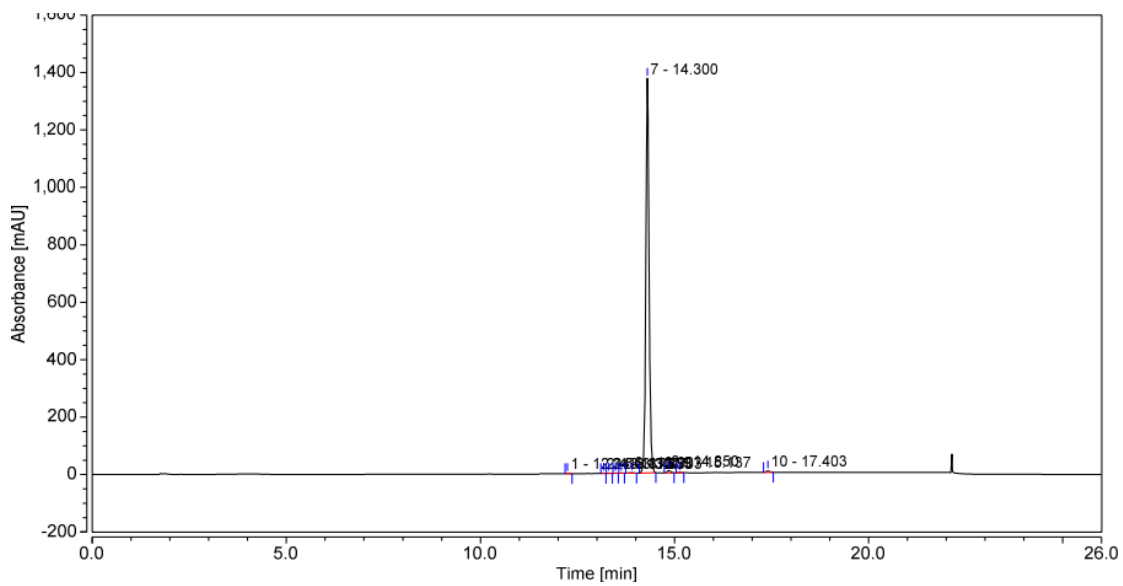

HPLC spectrum of **D14**



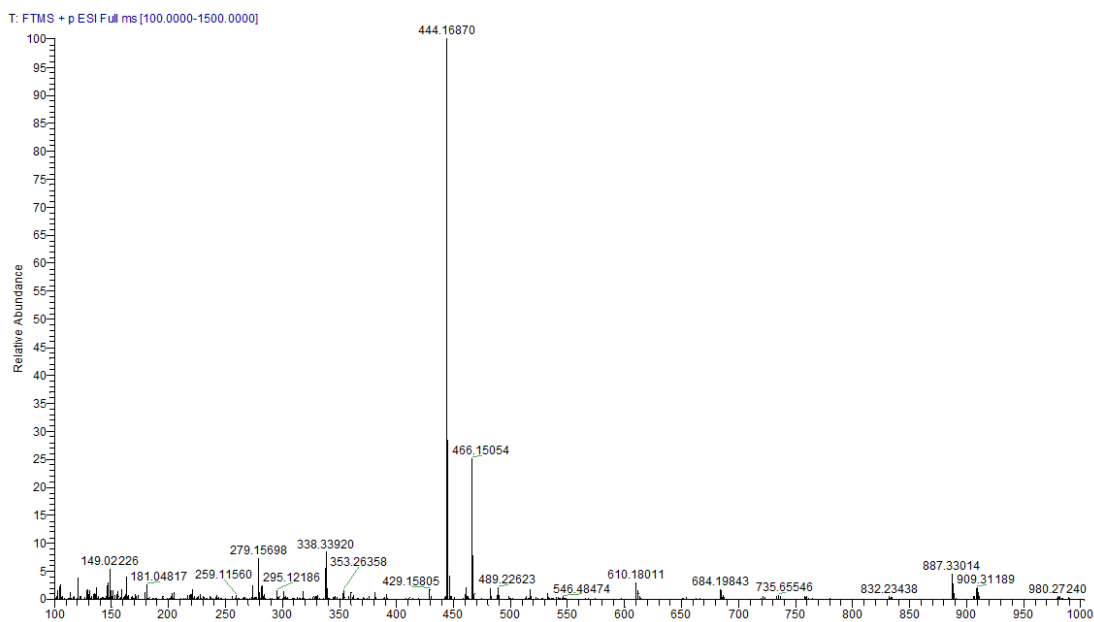

HRMS spectrum of D15

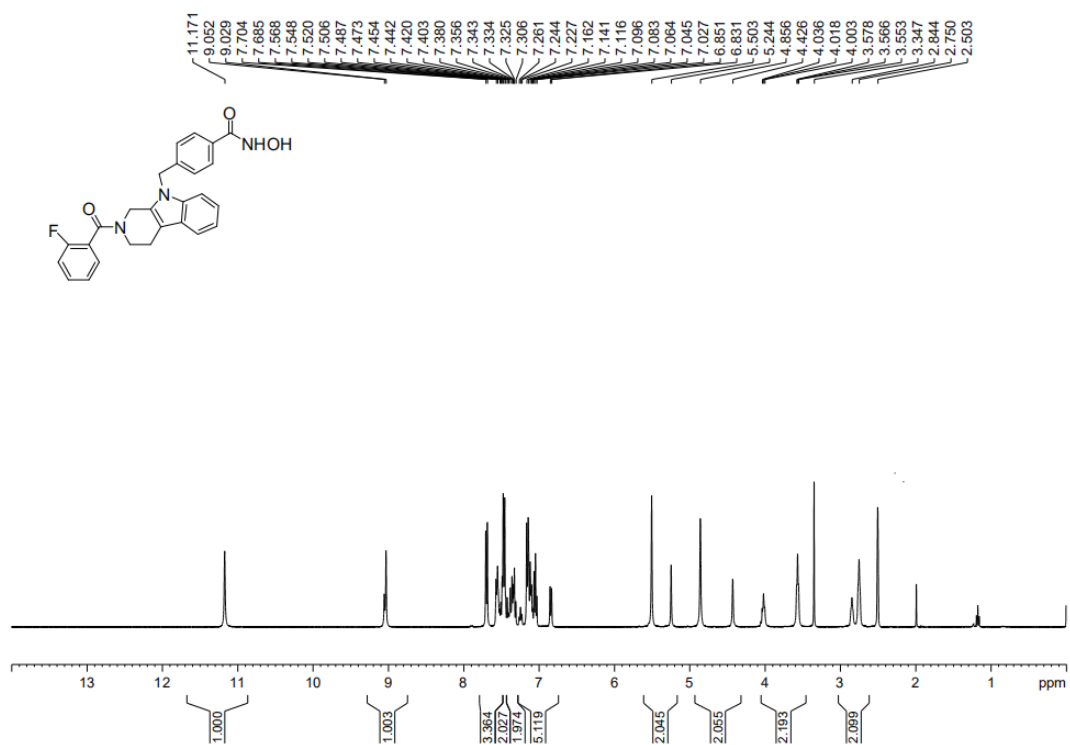

<sup>1</sup>H NMR spectrum of D15

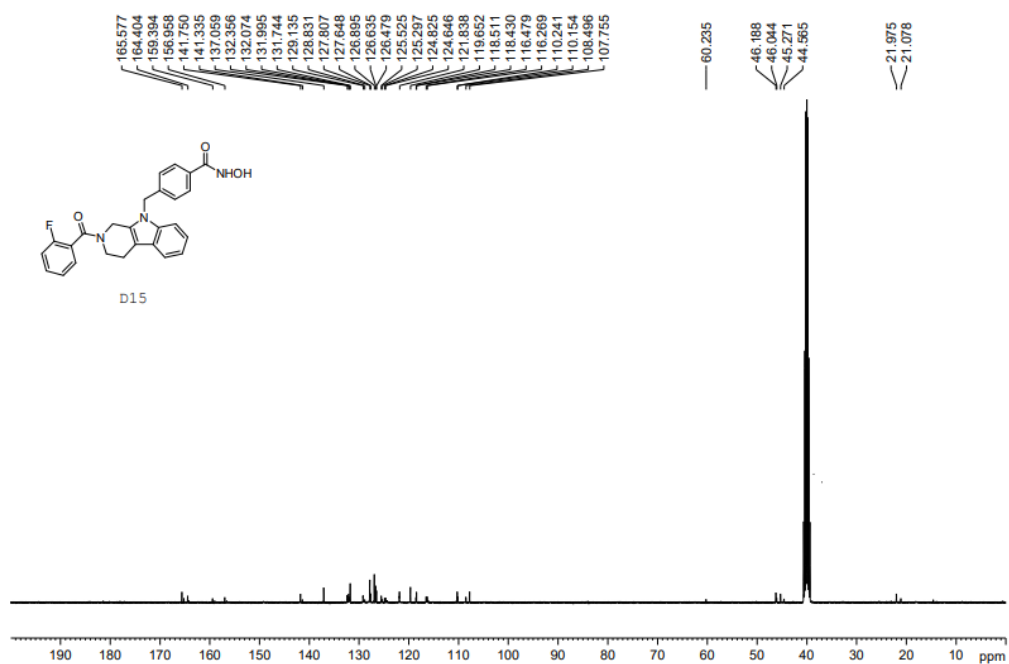

<sup>13</sup>C NMR spectrum of D15

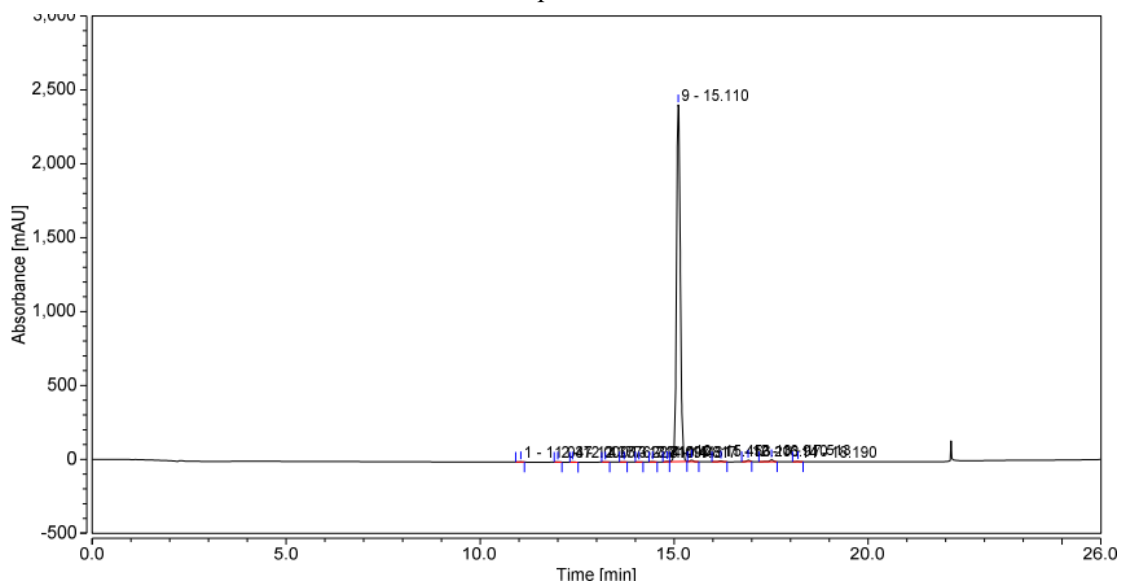

HPLC spectrum of D15

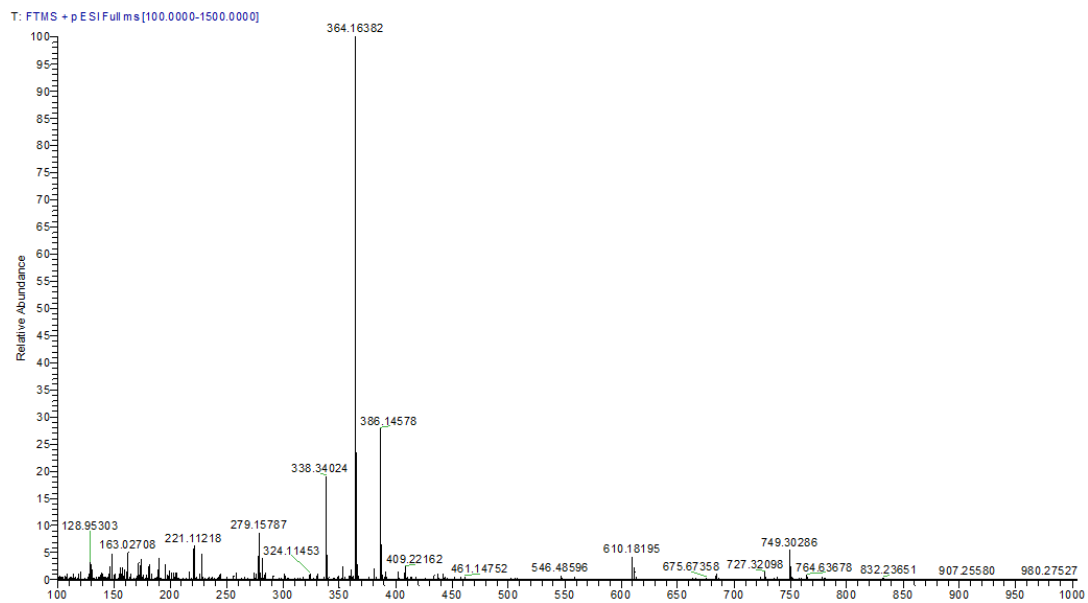

HRMS spectrum of D16

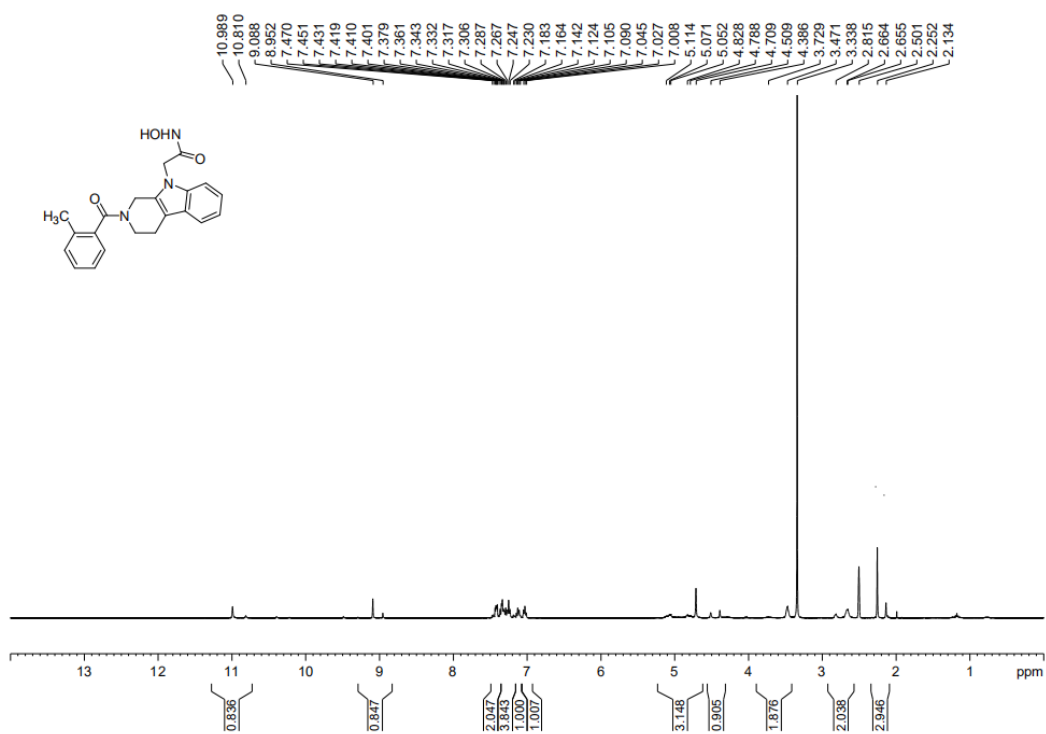

<sup>1</sup>H NMR spectrum of D16

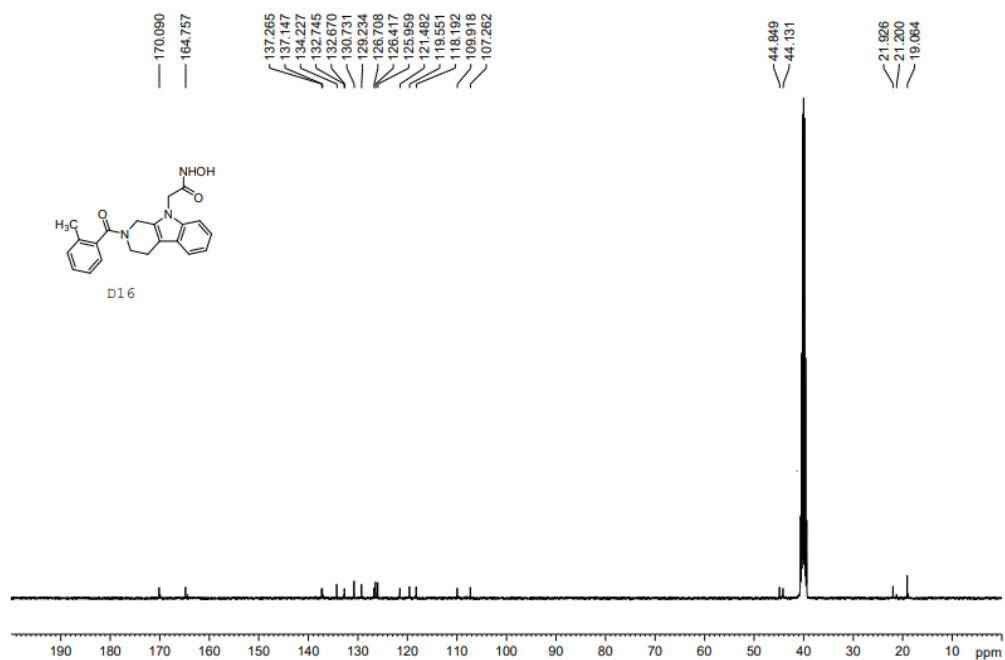

<sup>13</sup>C NMR spectrum of D16

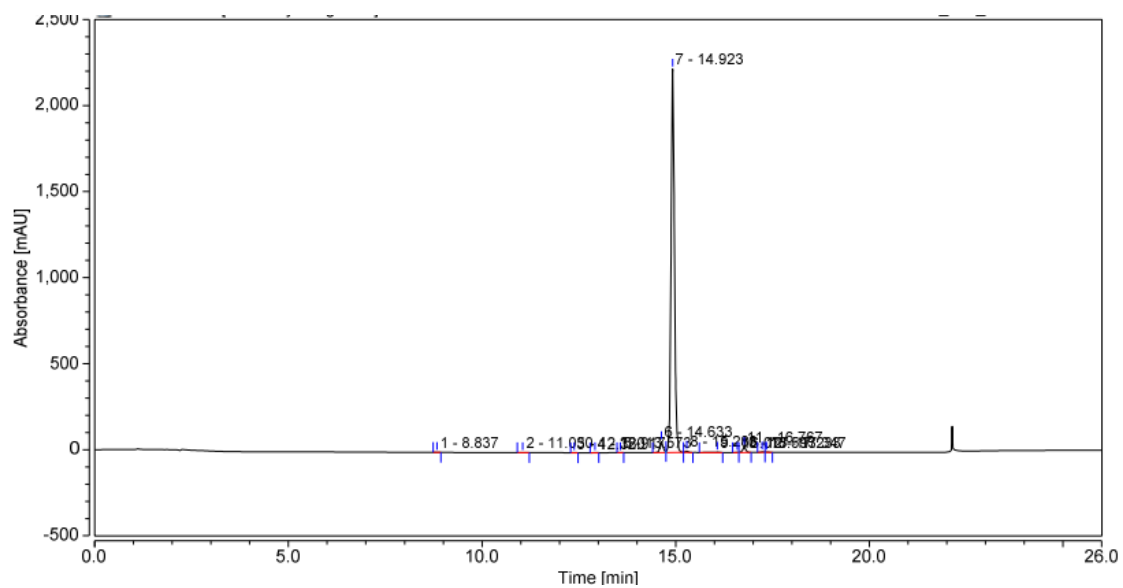

HPLC spectrum of D16

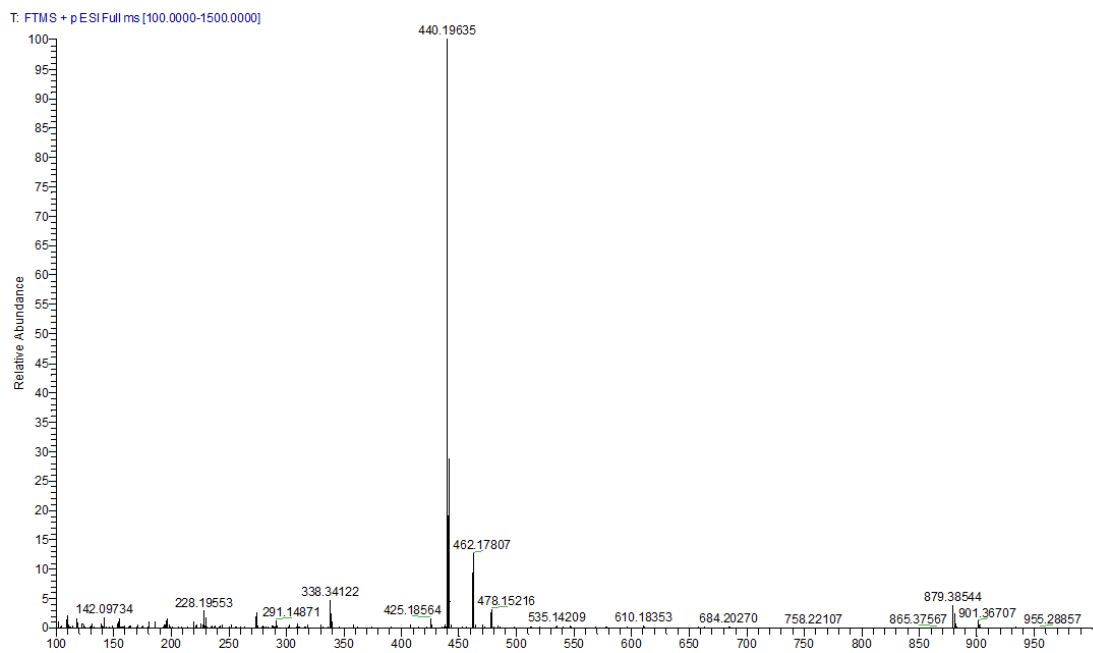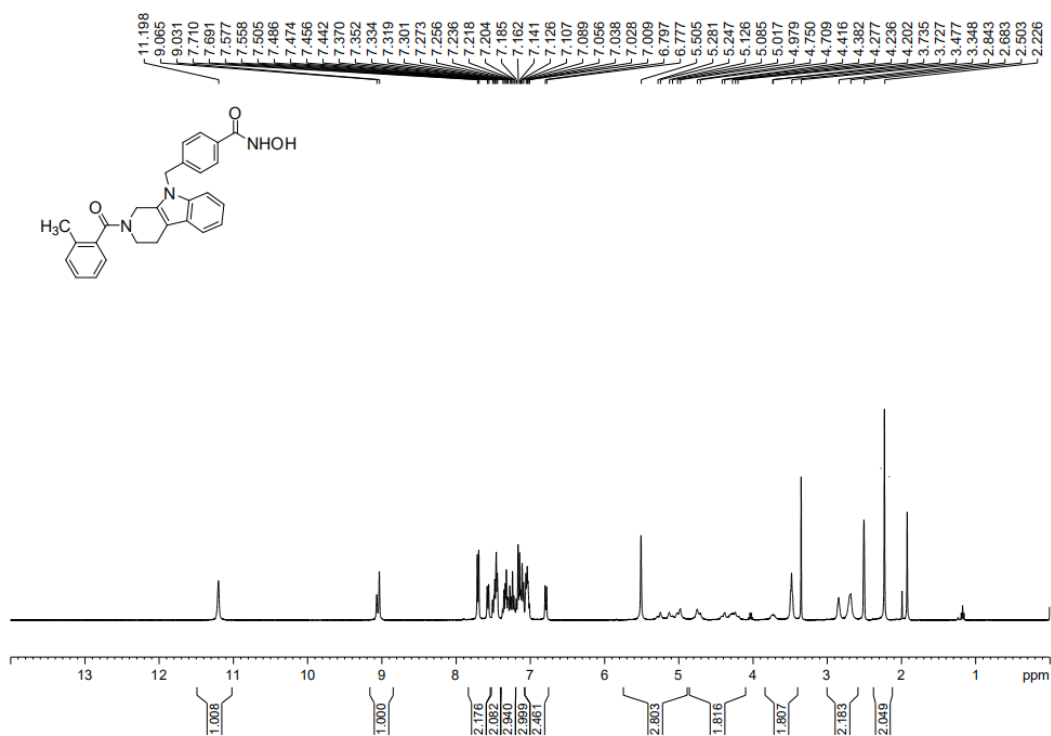

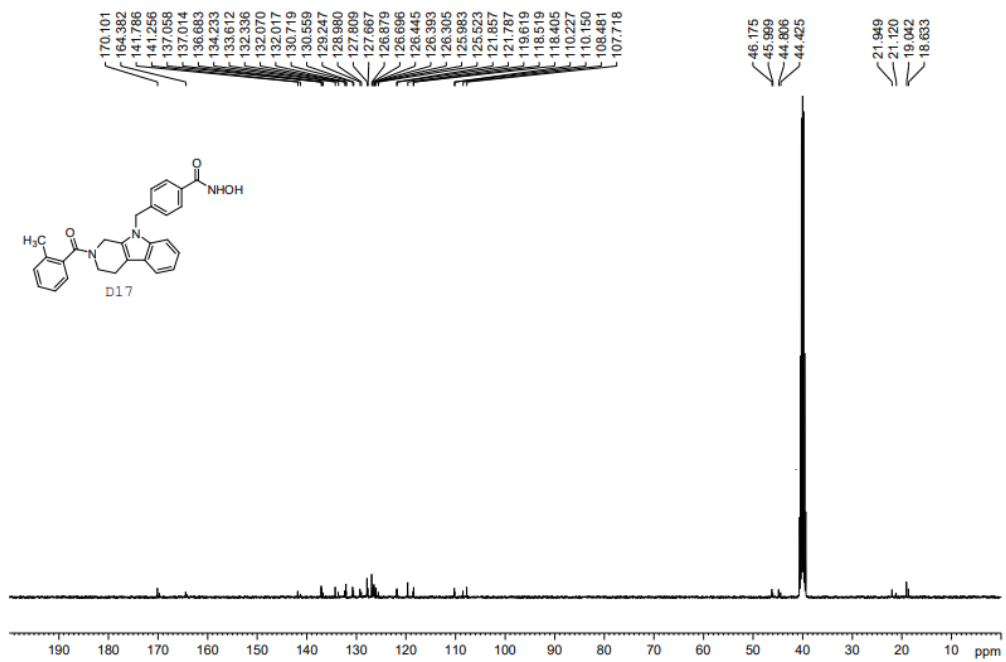

<sup>13</sup>C NMR spectrum of **D17**

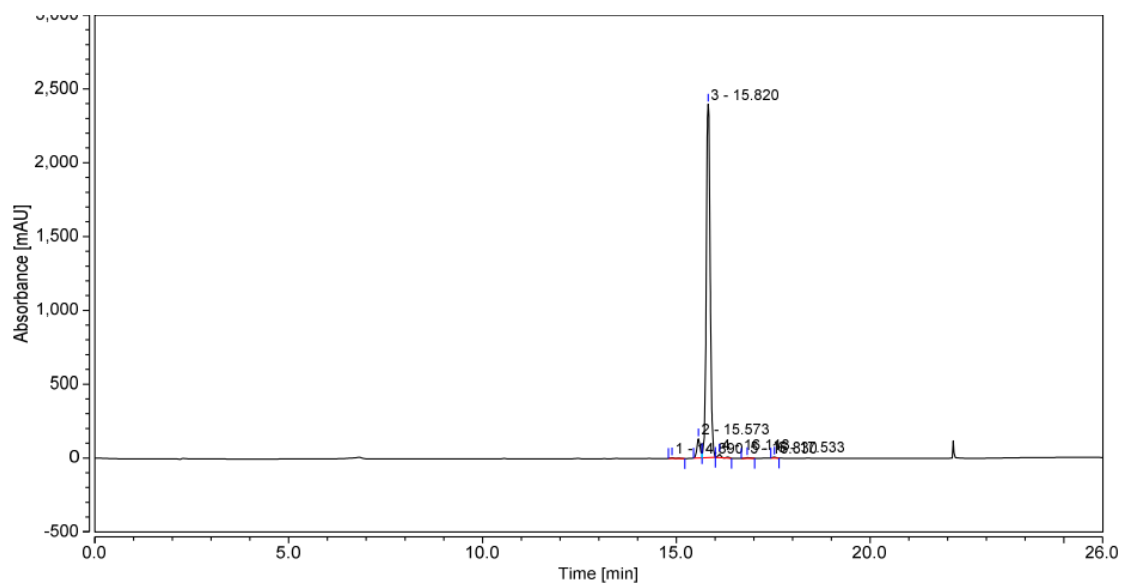

HPLC spectrum of **D17**

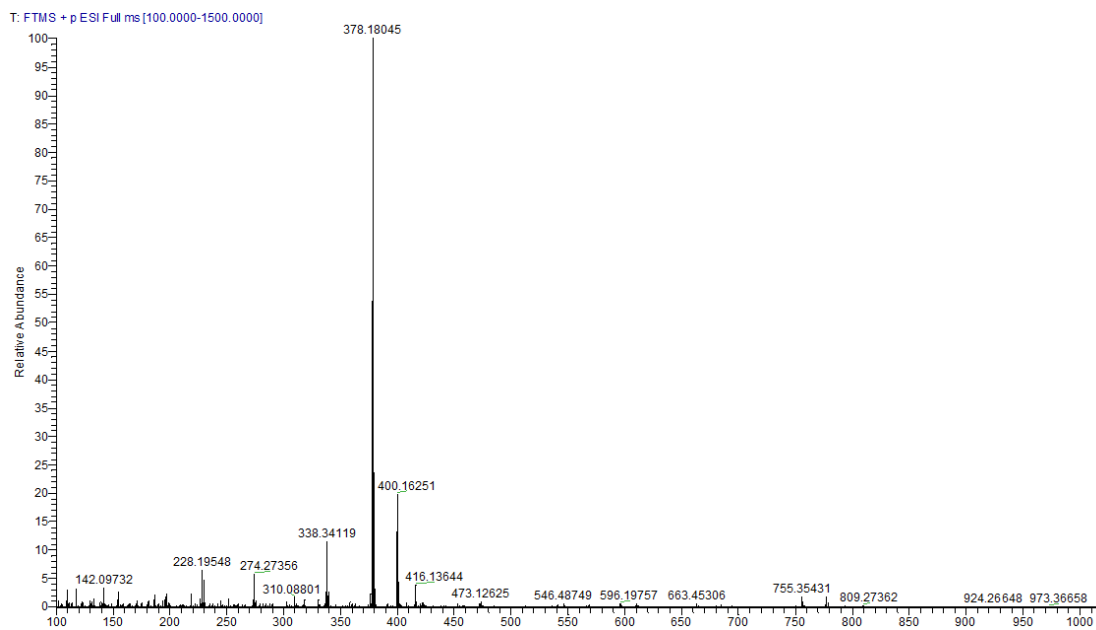

HRMS spectrum of **D18**

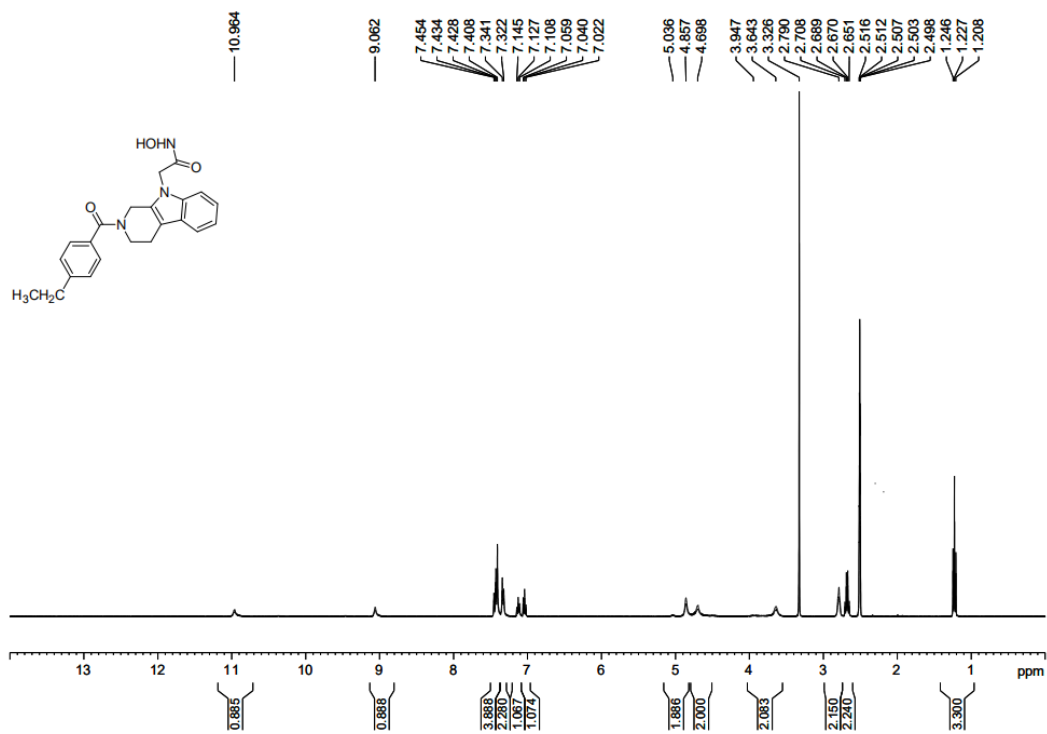

$^1\text{H}$  NMR spectrum of **D18**

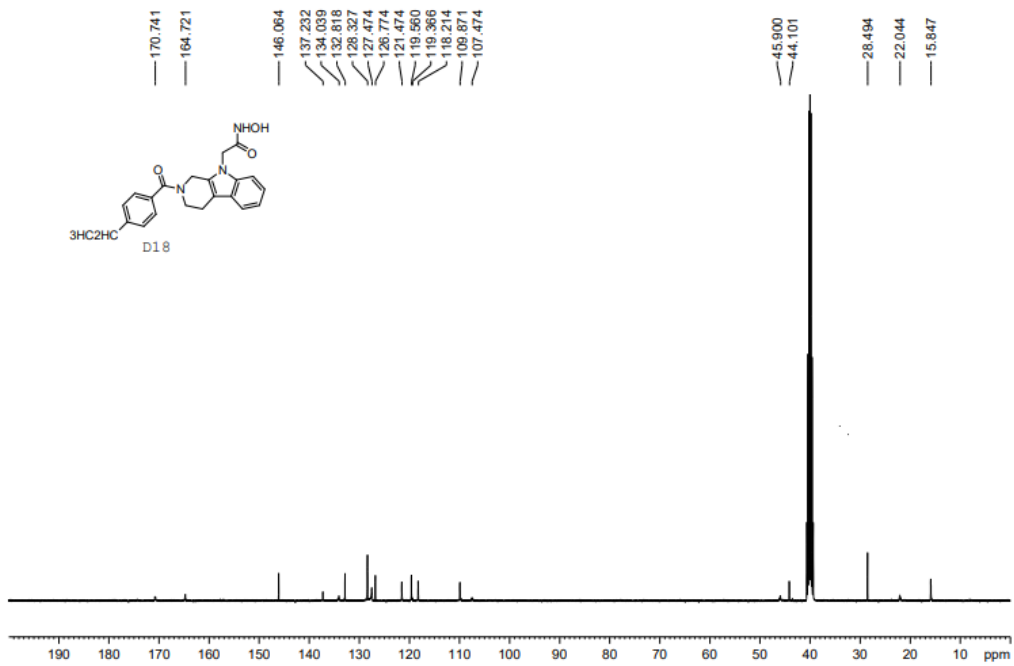

$^{13}\text{C}$  NMR spectrum of **D18**

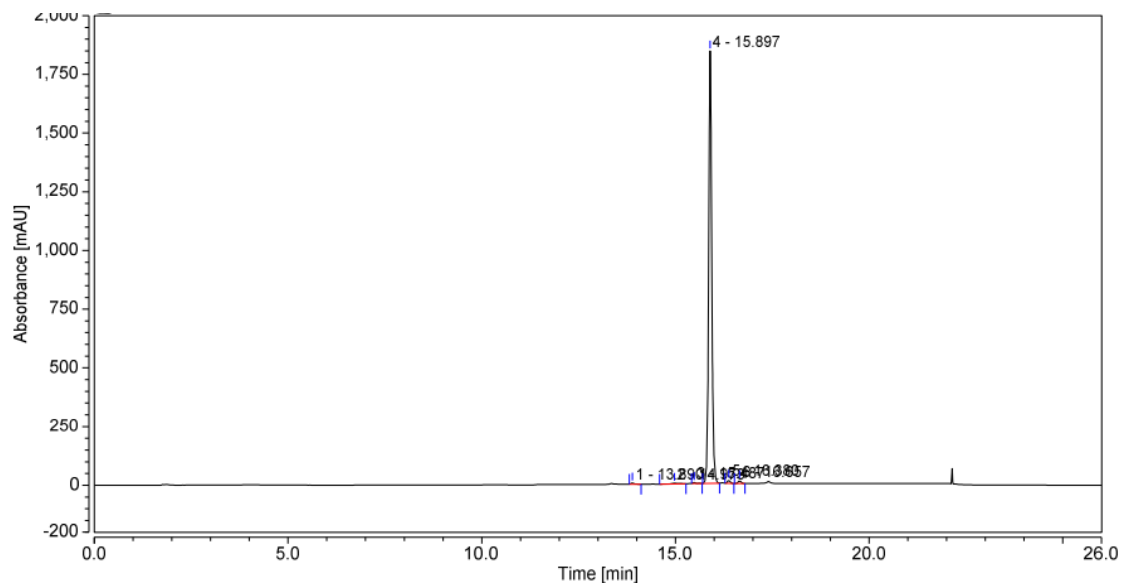

HPLC spectrum of **D18**



T: FTMS + p ESI Full ms [100.0000-1500.0000]

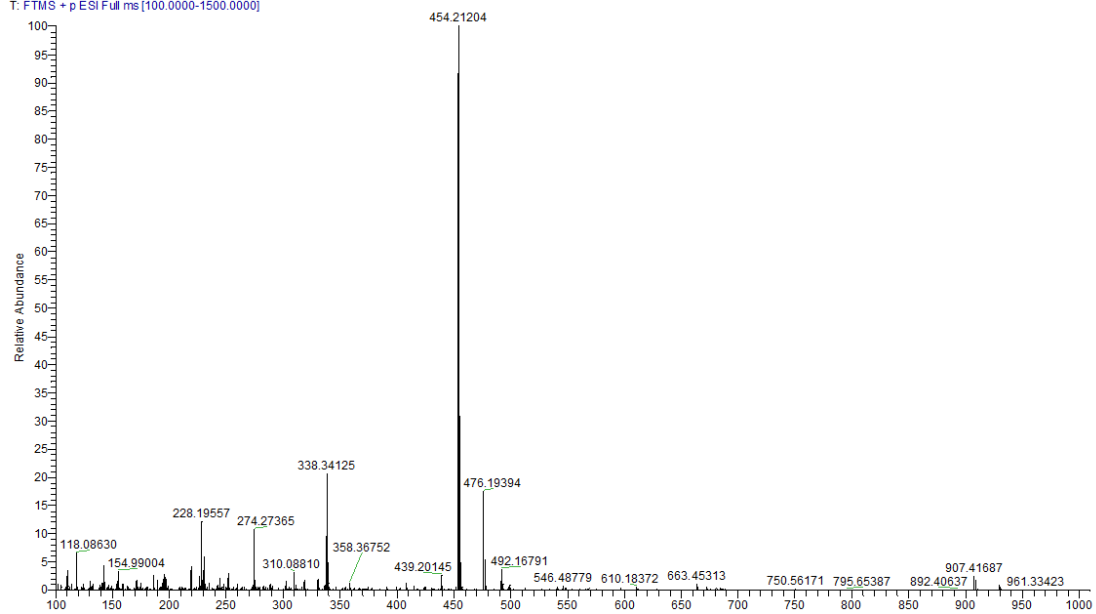

HRMS spectrum of D19

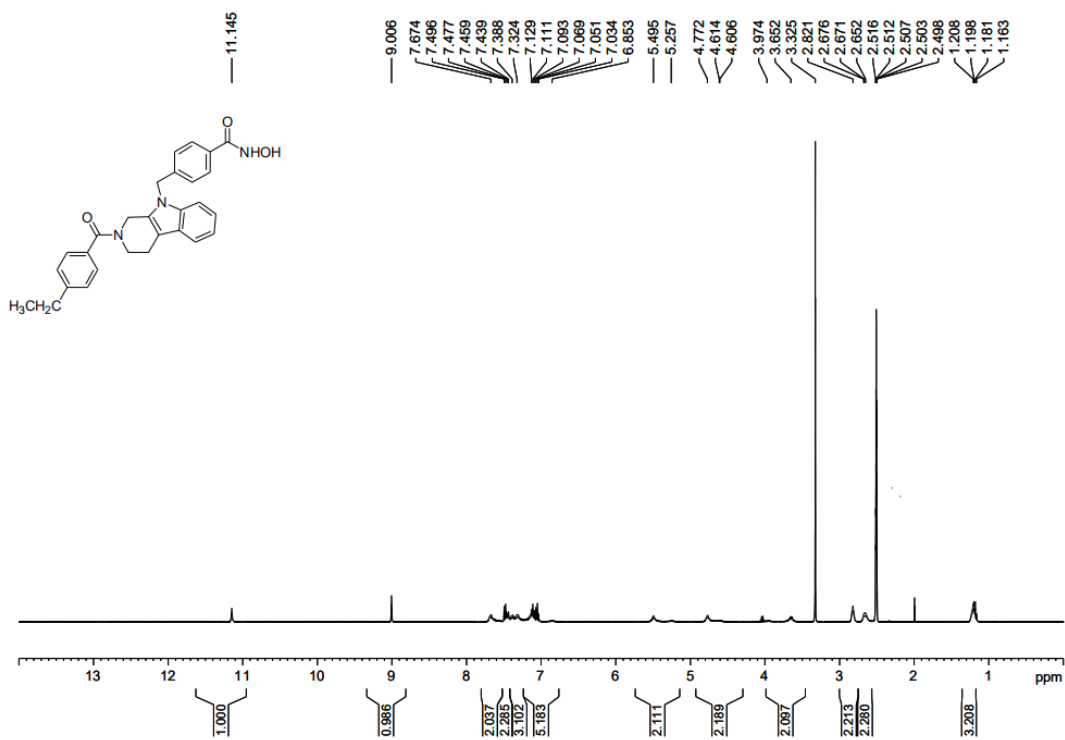

<sup>1</sup>H NMR spectrum of D19

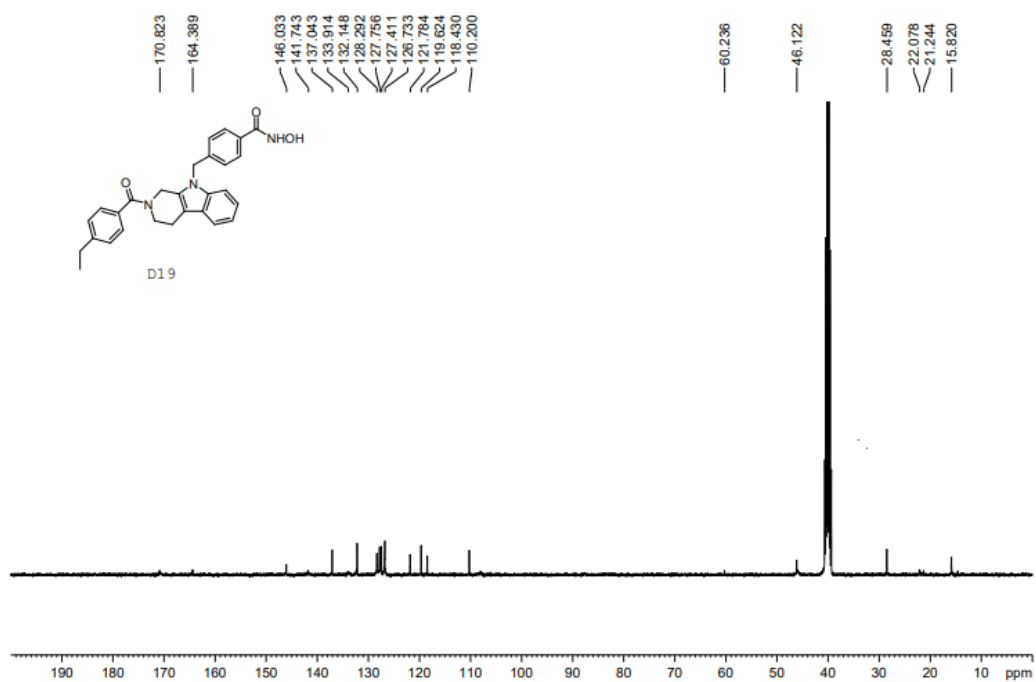

<sup>13</sup>C NMR spectrum of **D19**

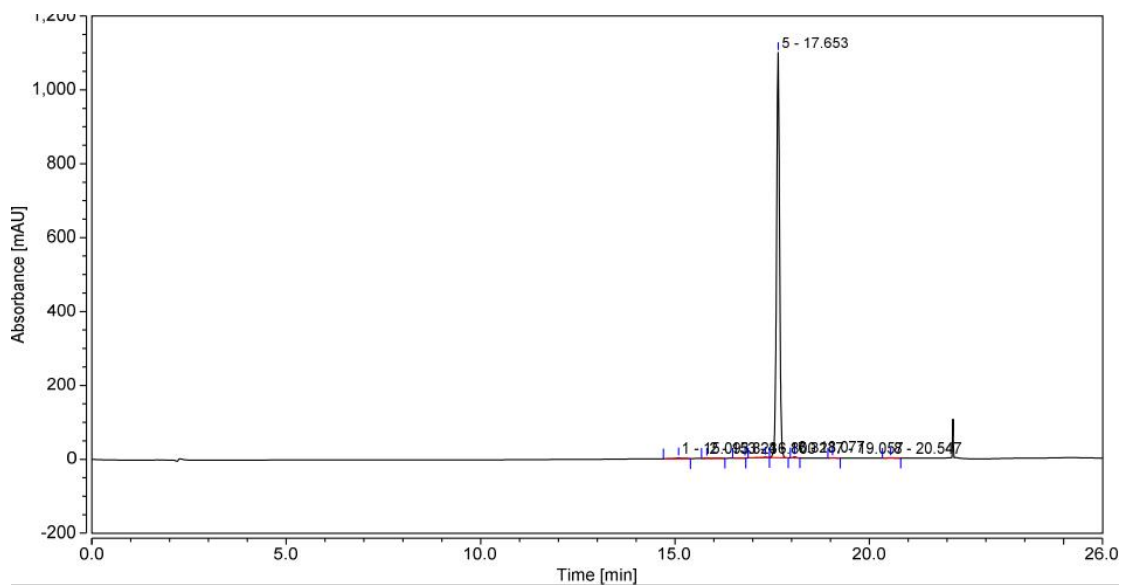

HPLC spectrum of **D19**

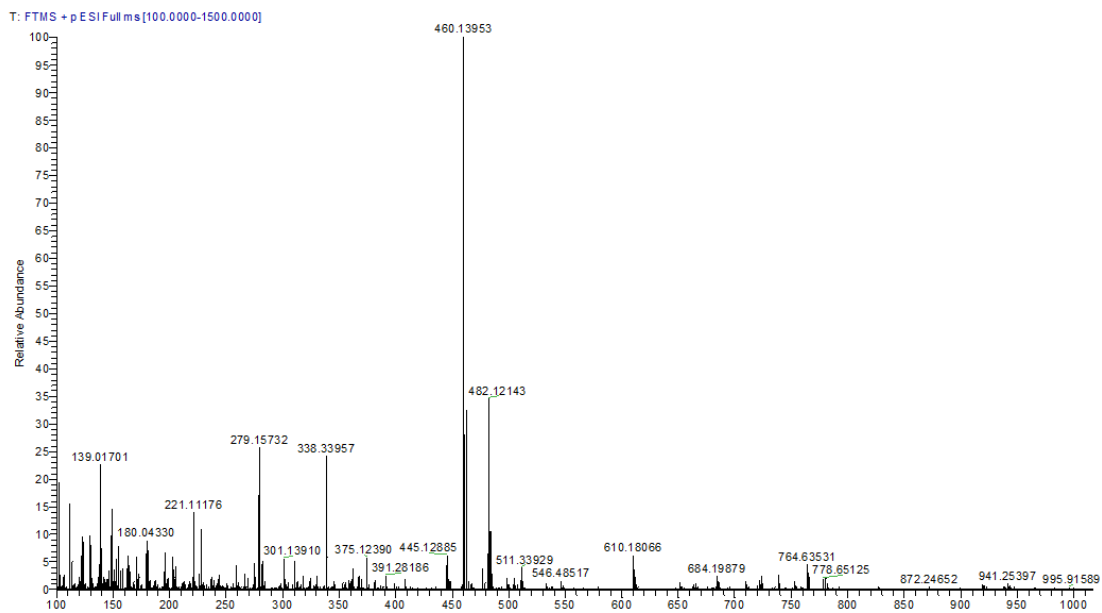

HRMS spectrum of D20

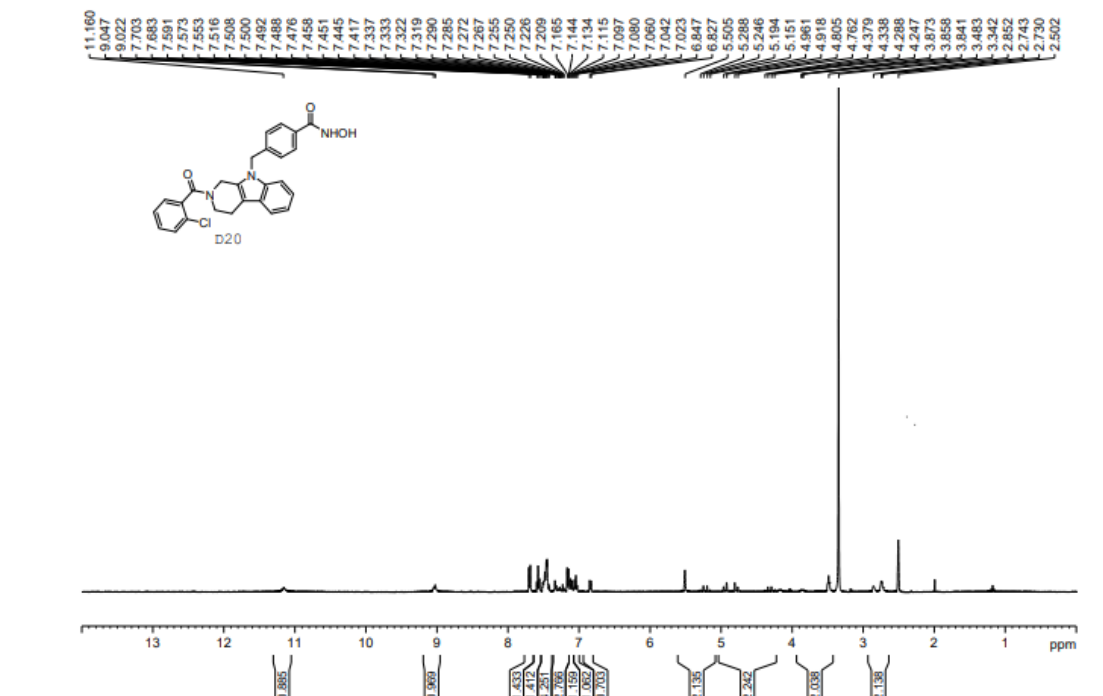

<sup>1</sup>H NMR spectrum of D20

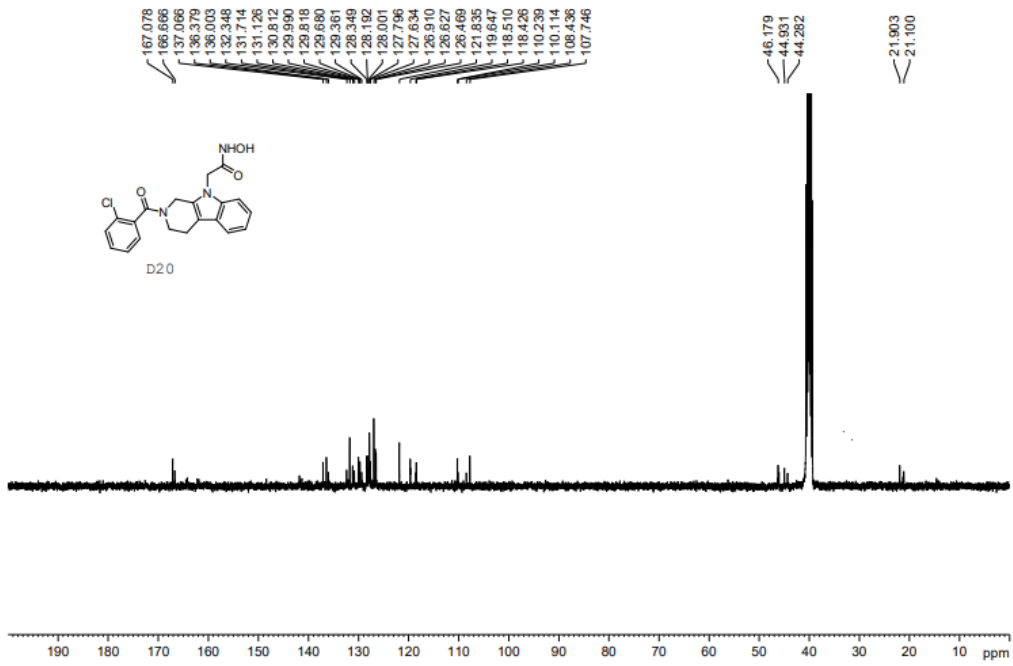

<sup>13</sup>C NMR spectrum of **D20**

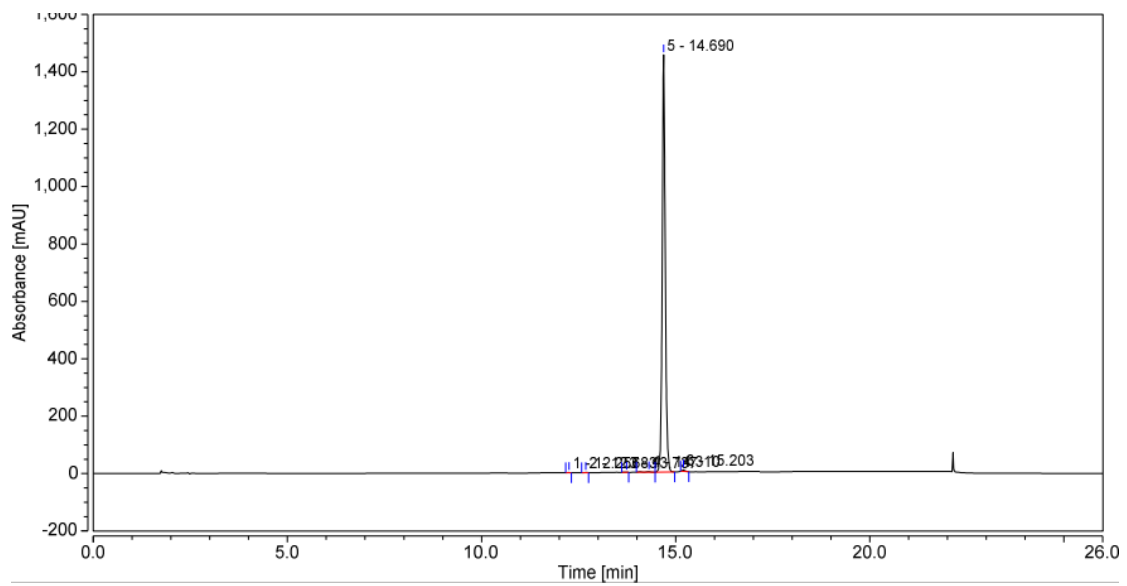

HPLC spectrum of **D20**

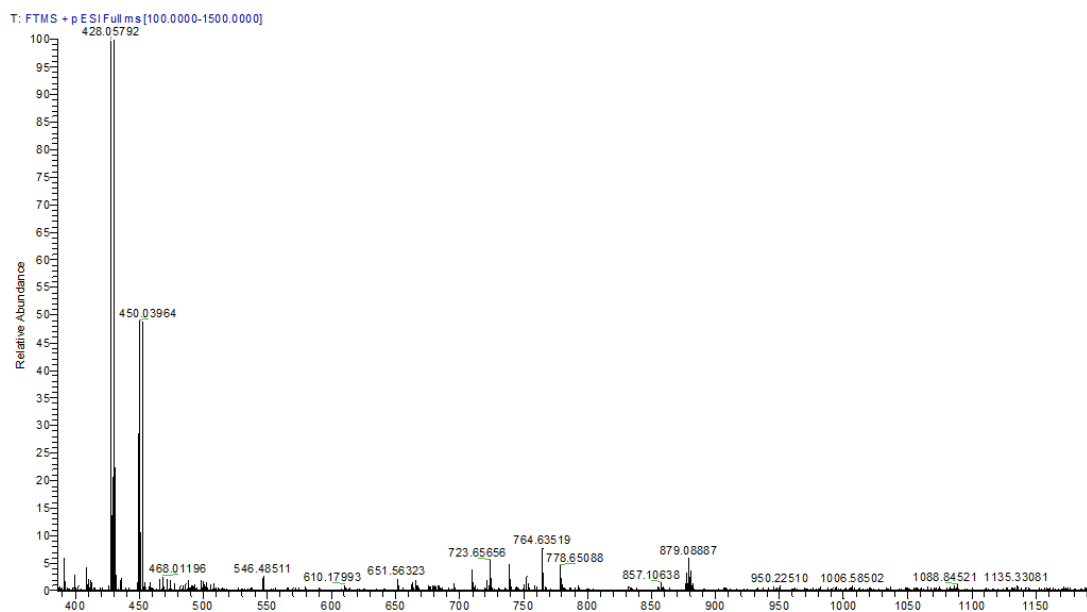

HRMS spectrum of D21

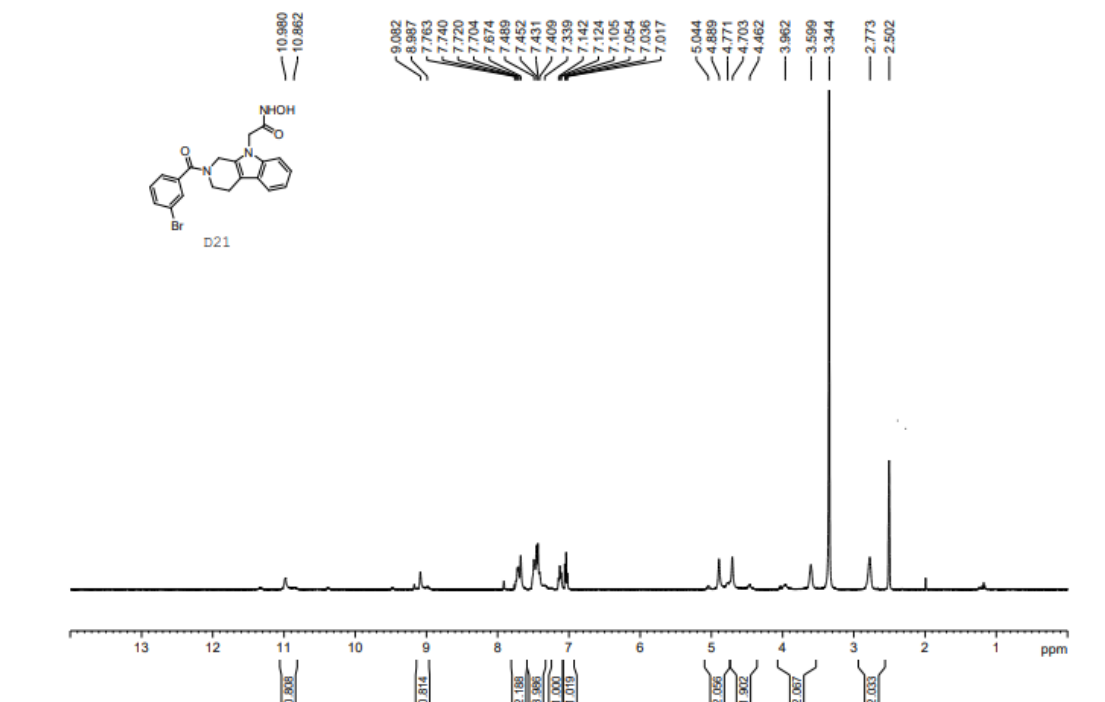

$^1\text{H}$  NMR spectrum of D21

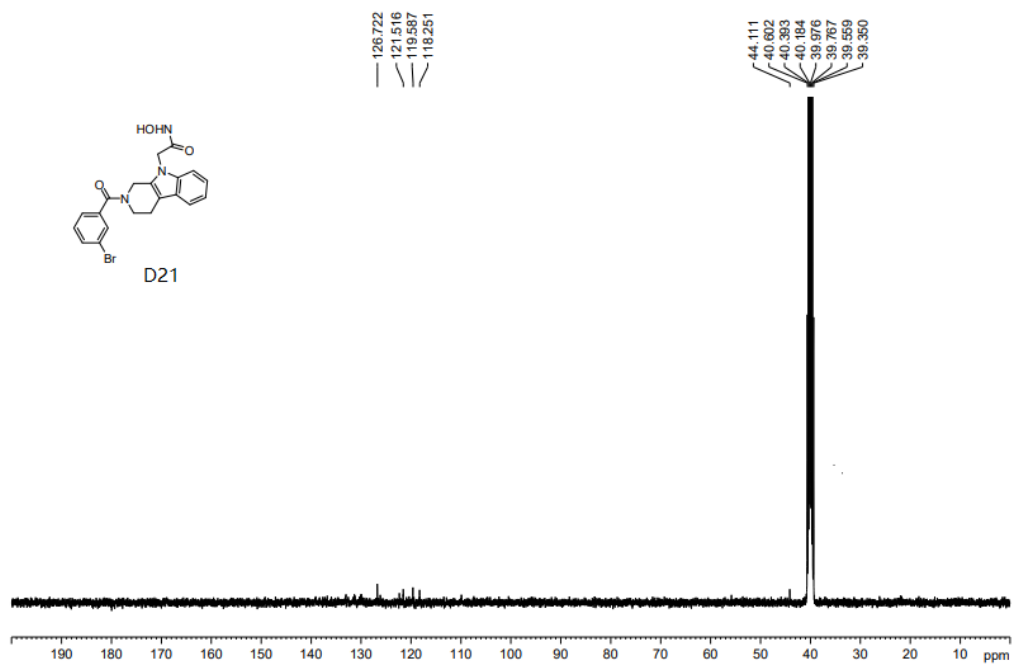

$^{13}\text{C}$  NMR spectrum of **D21**

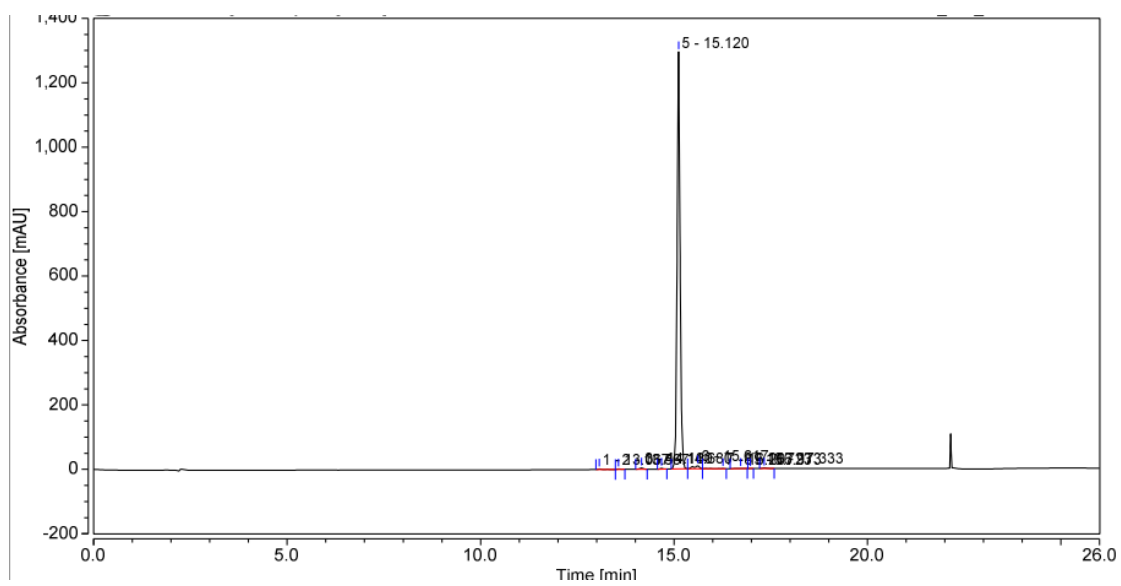

HPLC spectrum of **D21**

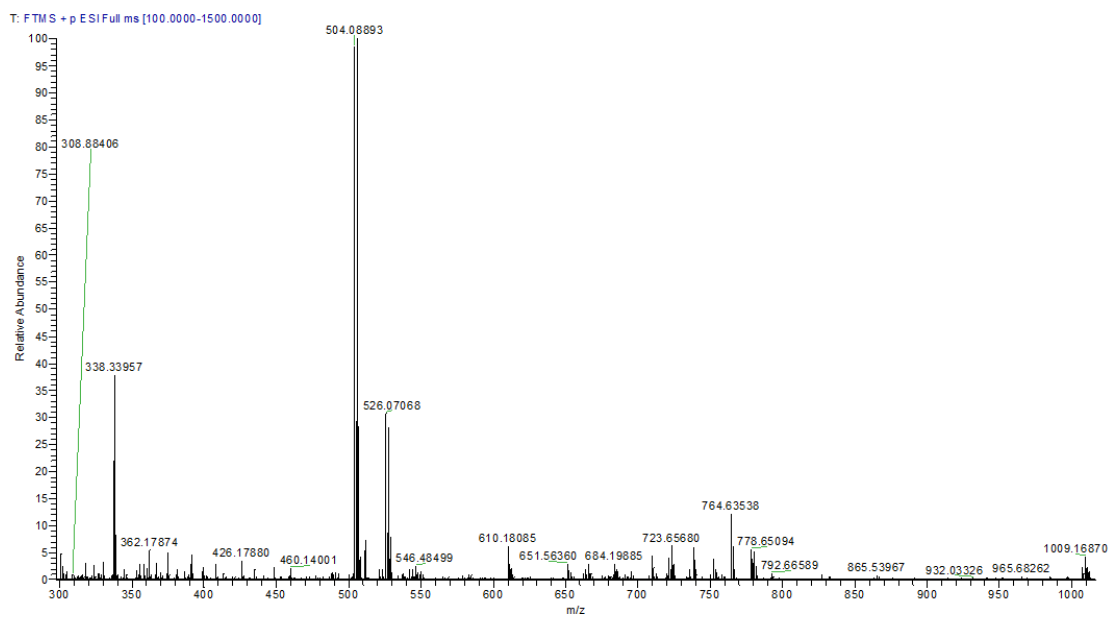

HRMS spectrum of D22

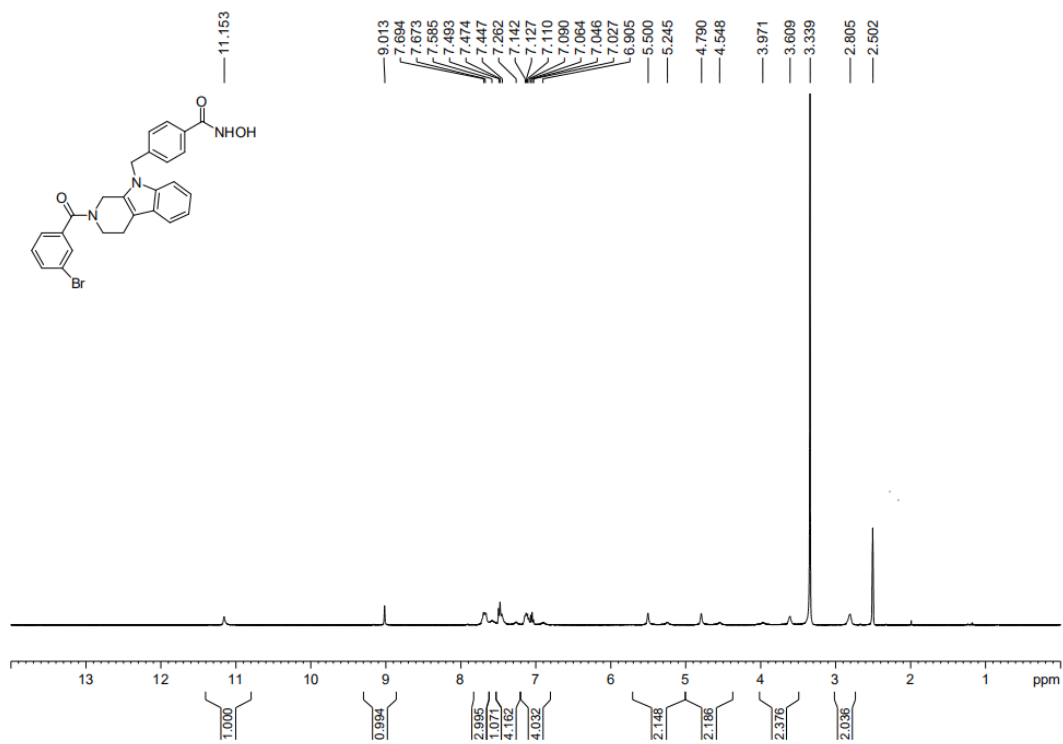

<sup>1</sup>H NMR spectrum of D22

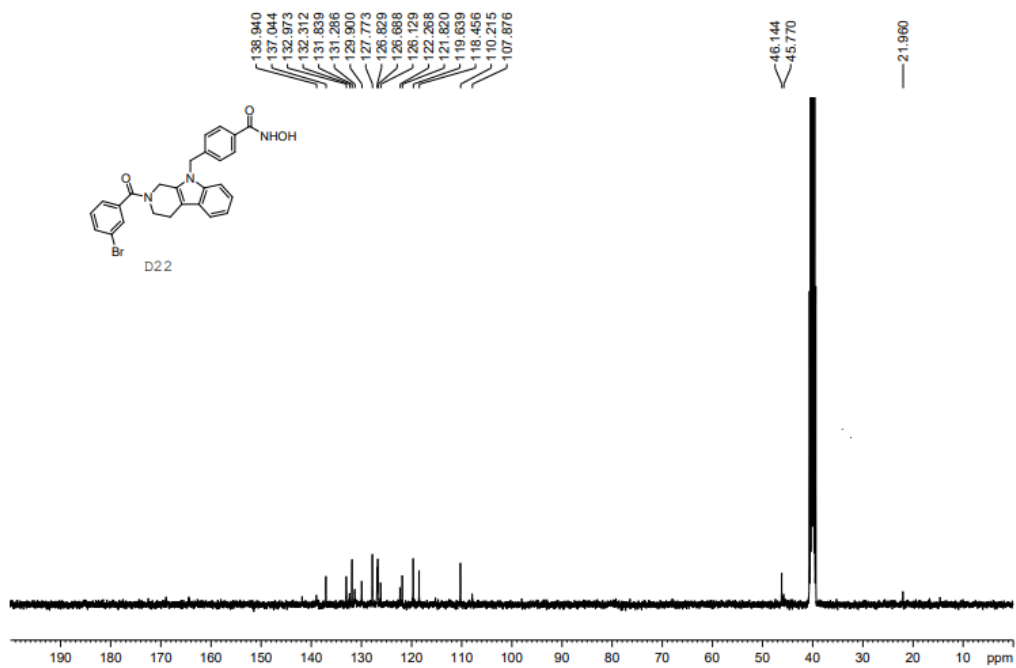

<sup>13</sup>C NMR spectrum of **D22**

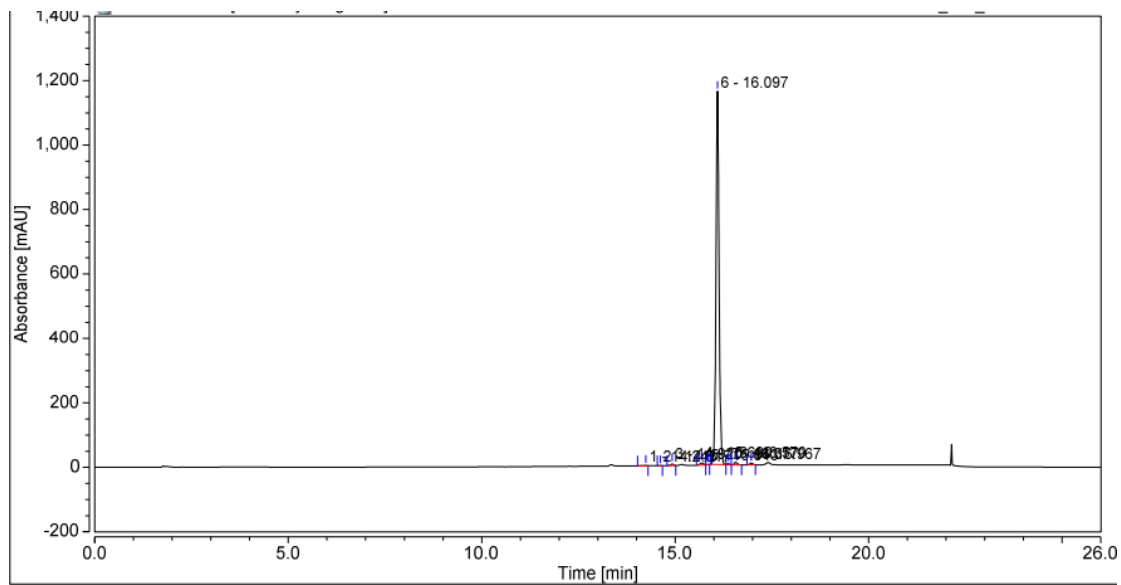

HPLC spectrum of **D22**



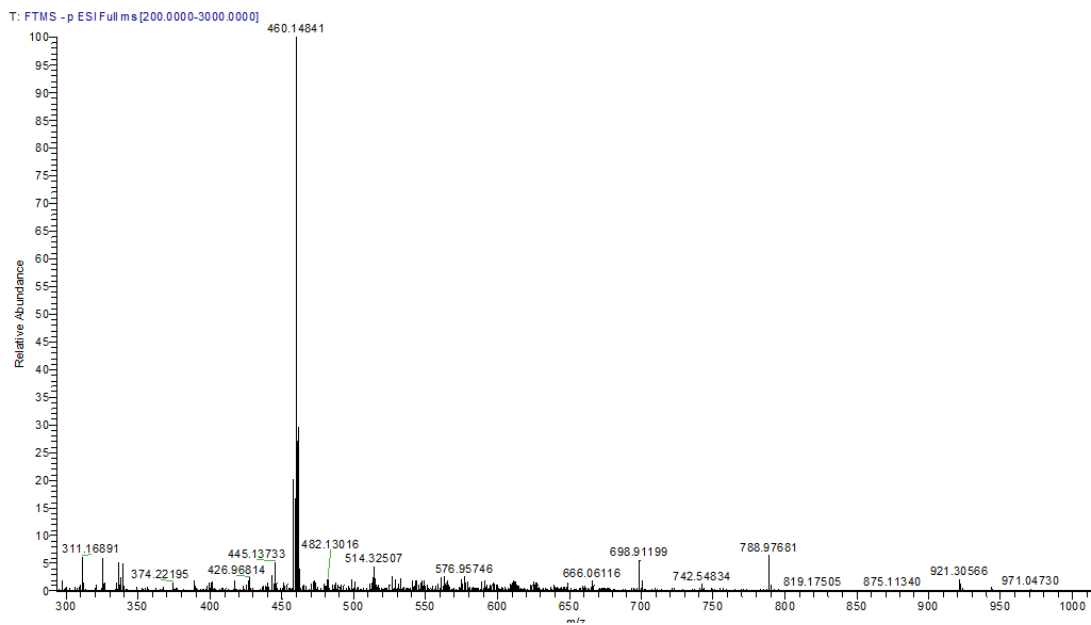

HRMS spectrum of **D23**

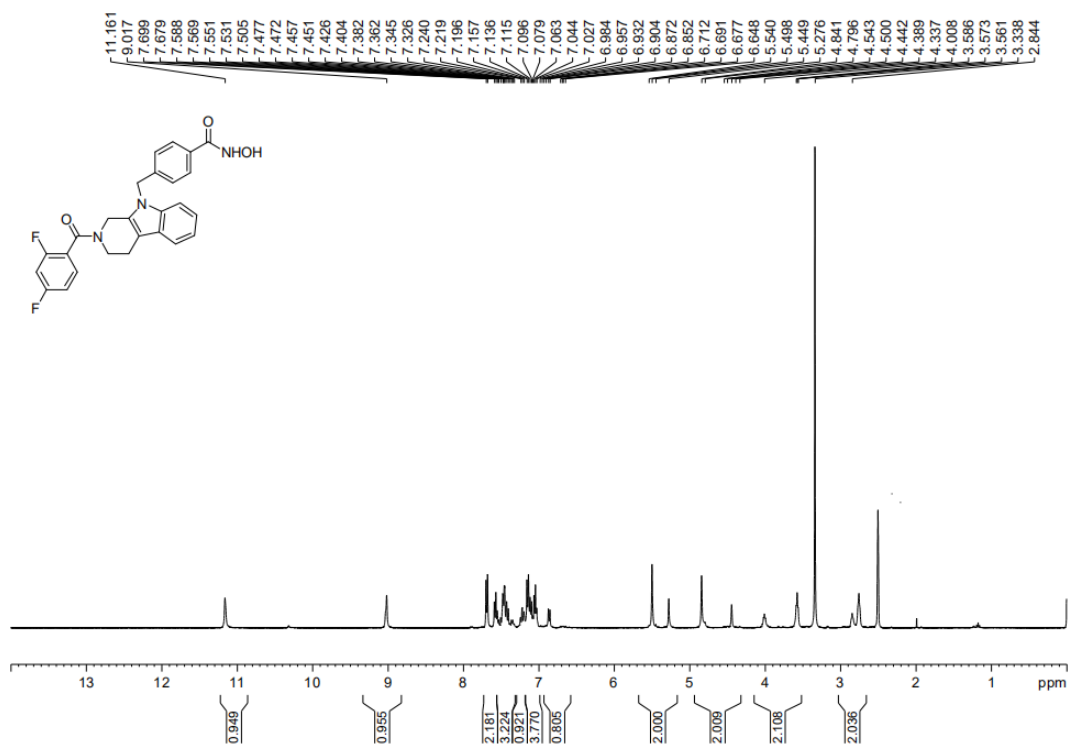

$^1\text{H}$  NMR spectrum of **D23**

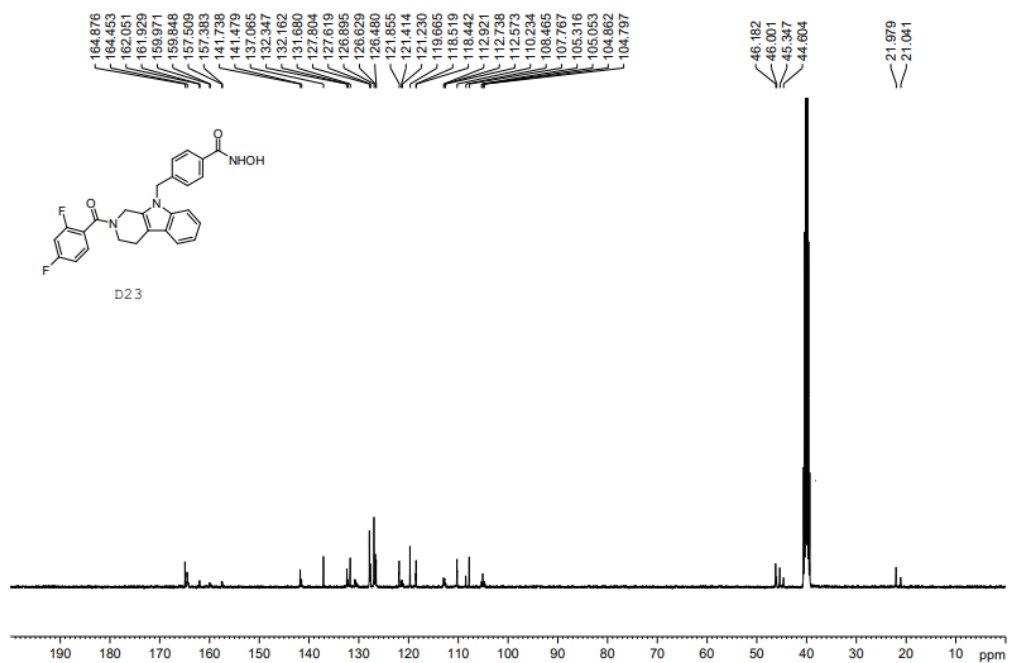

<sup>13</sup>C NMR spectrum of D23

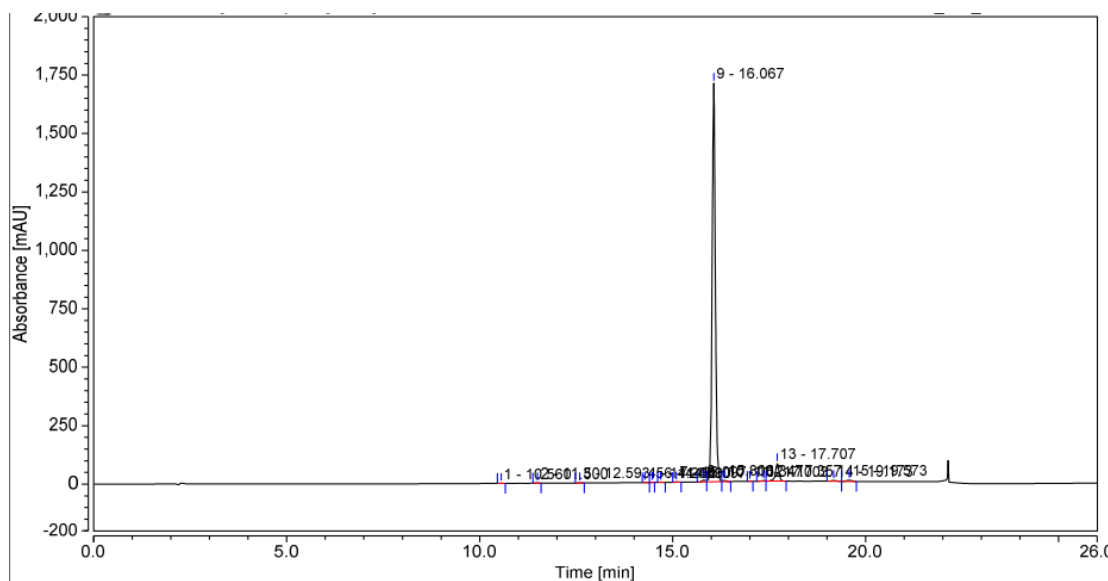

HPLC spectrum of D23

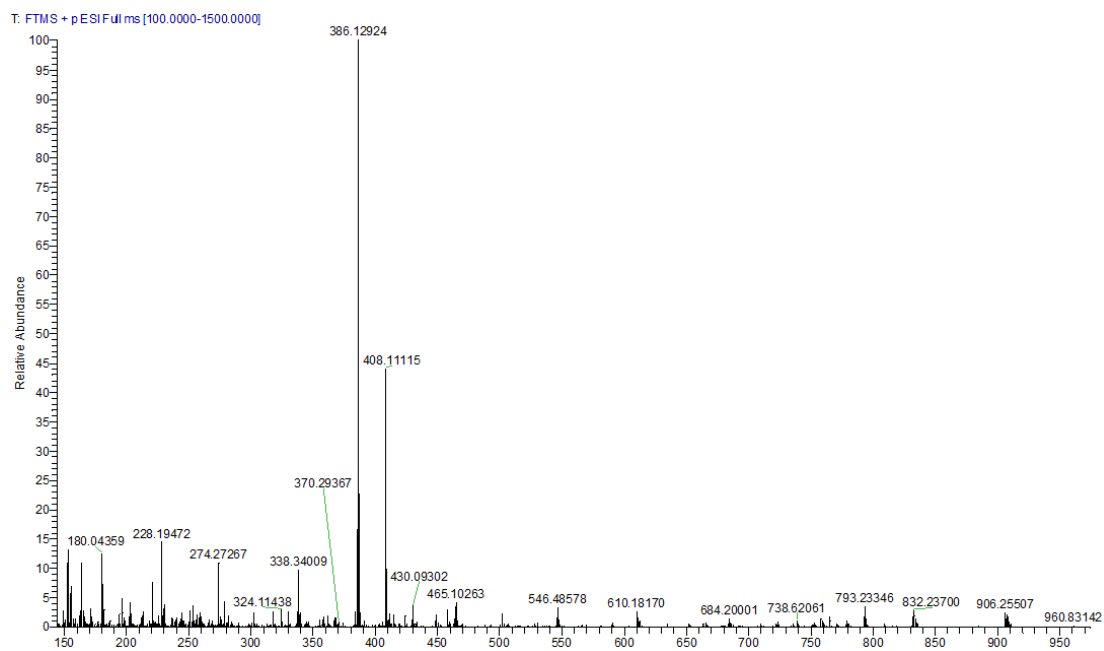

HRMS spectrum of D24

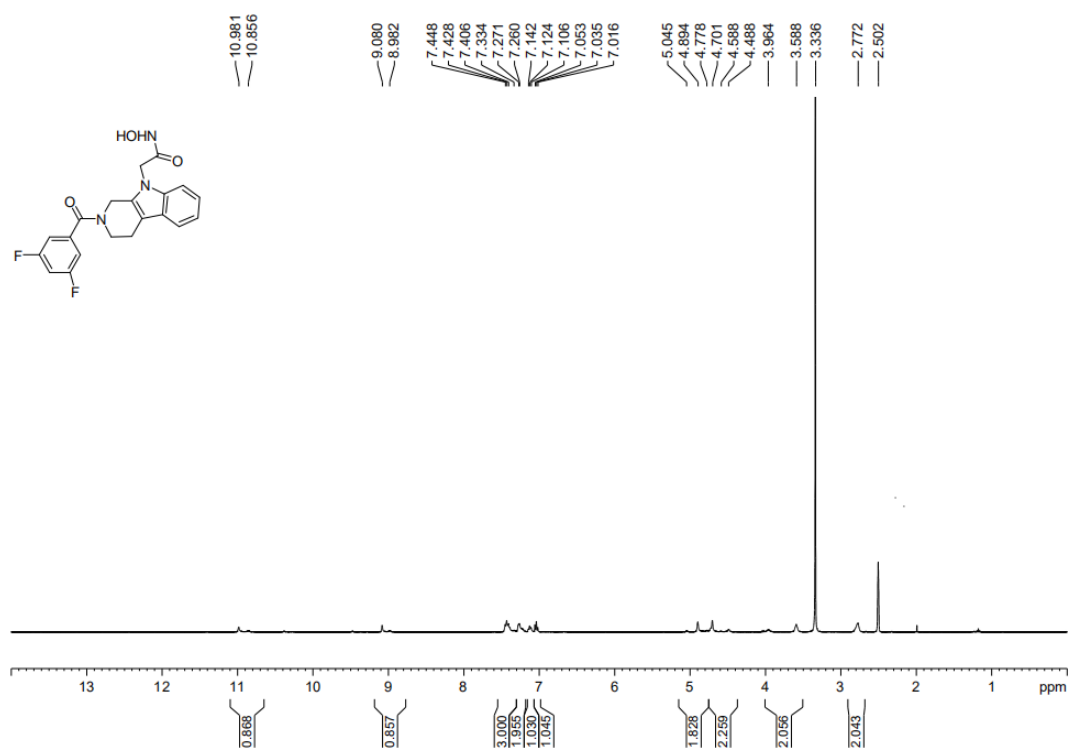

<sup>1</sup>H NMR spectrum of D24

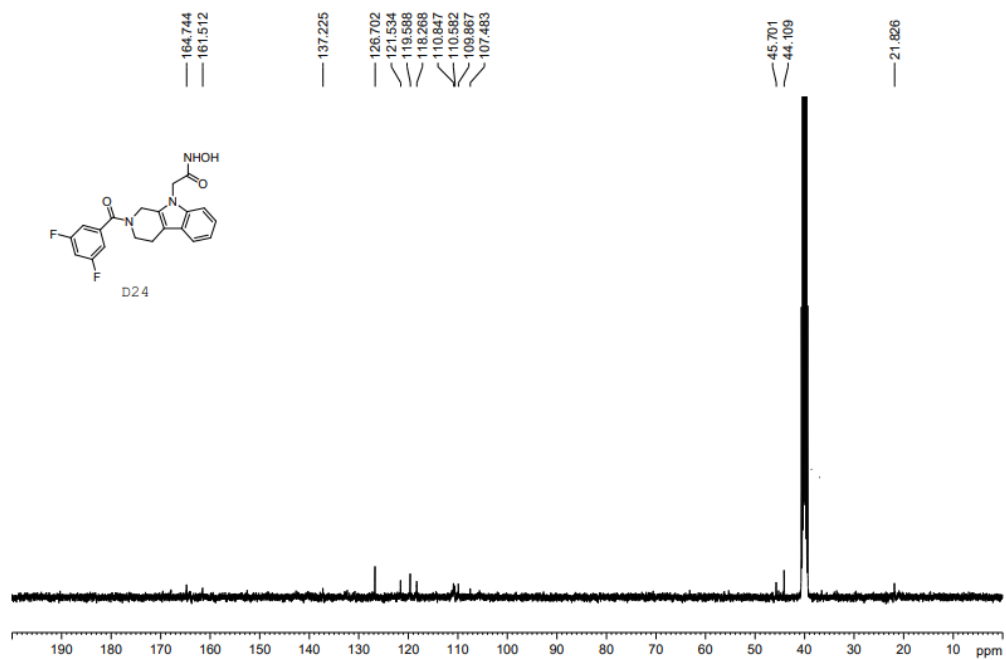

<sup>13</sup>C NMR spectrum of **D24**

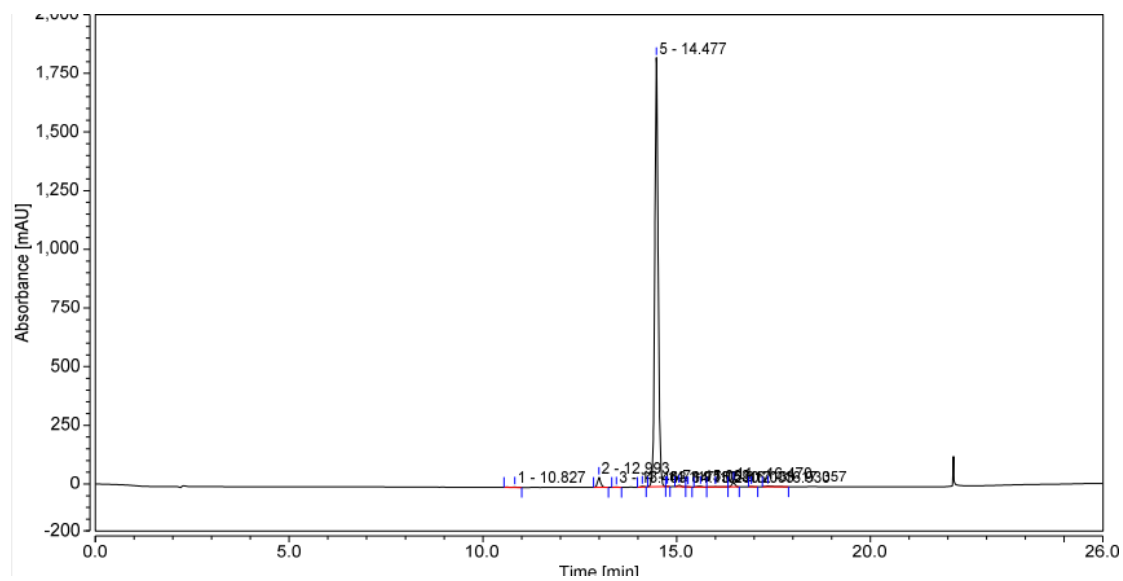

HPLC spectrum of **D24**

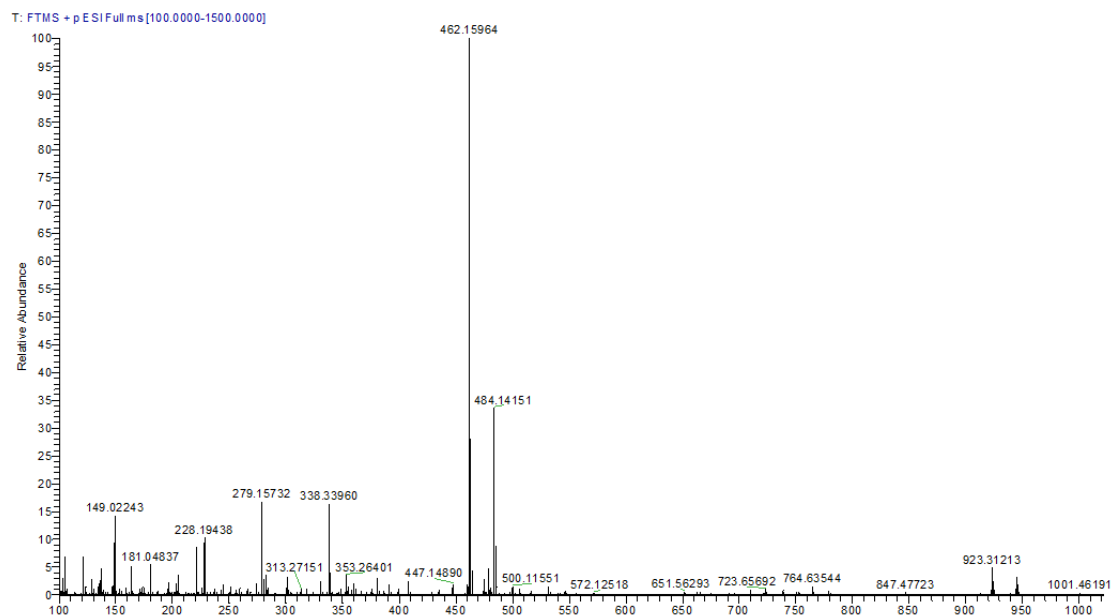

HRMS spectrum of D25

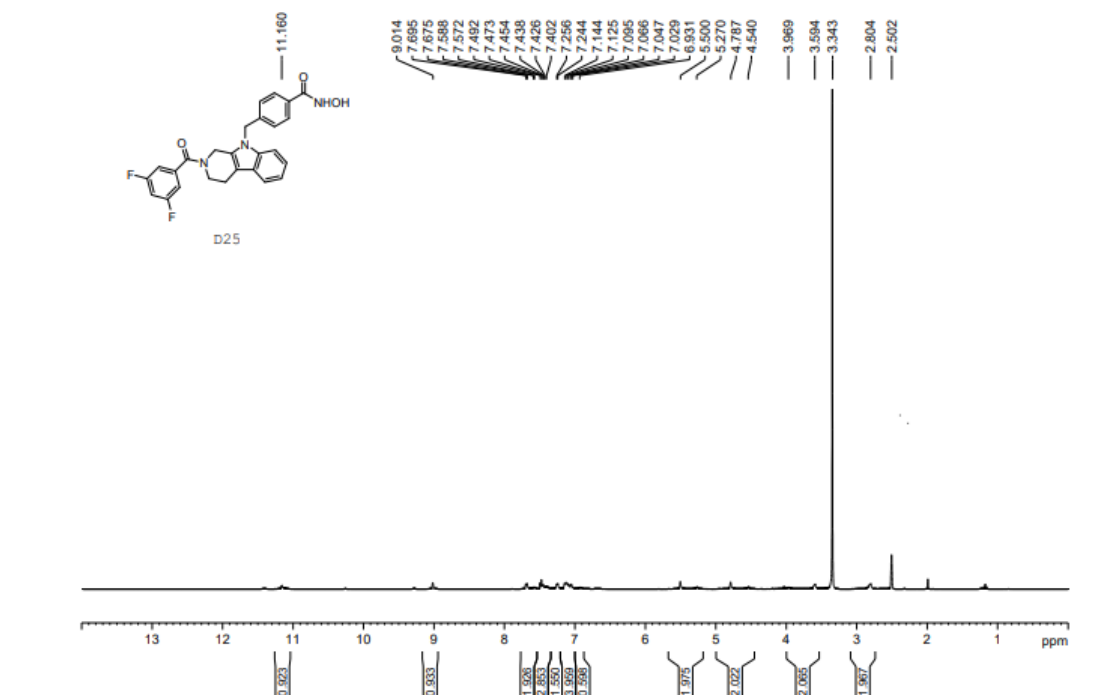

<sup>1</sup>H NMR spectrum of D25

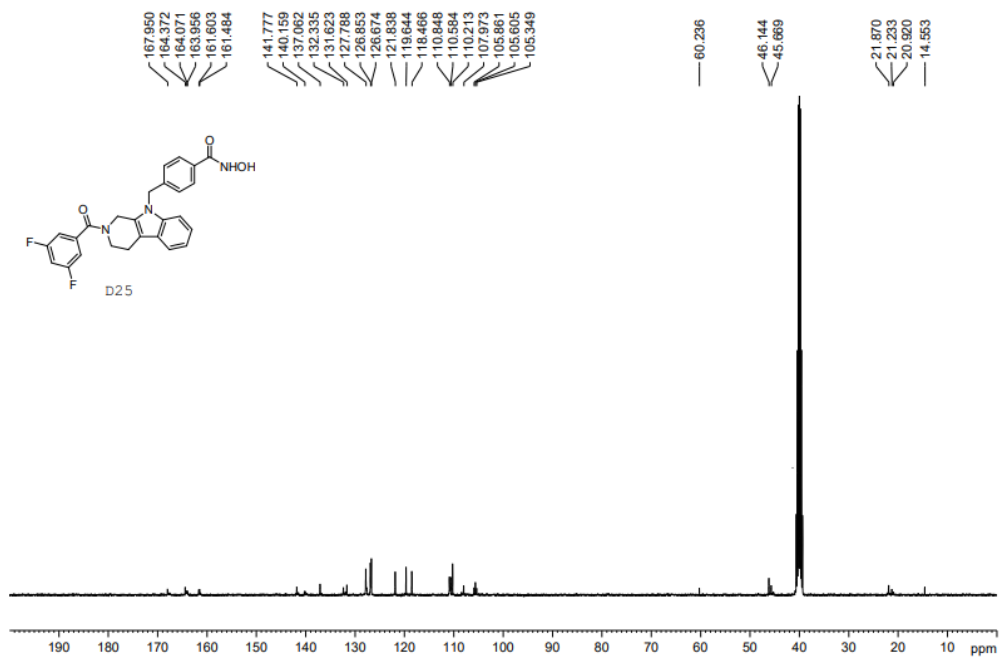

<sup>13</sup>C NMR spectrum of D25

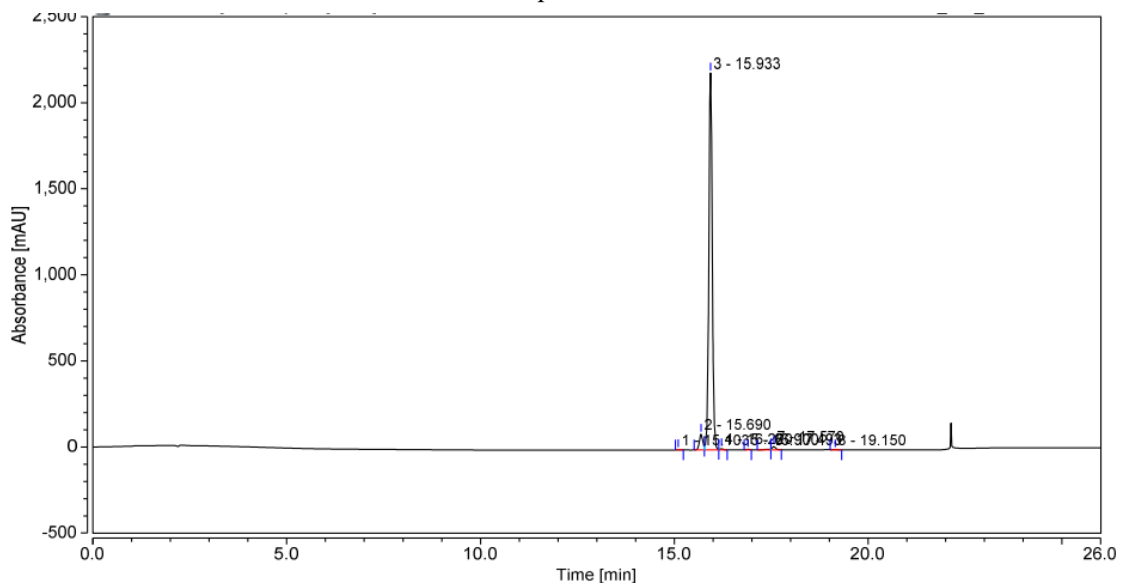

HPLC spectrum of D25

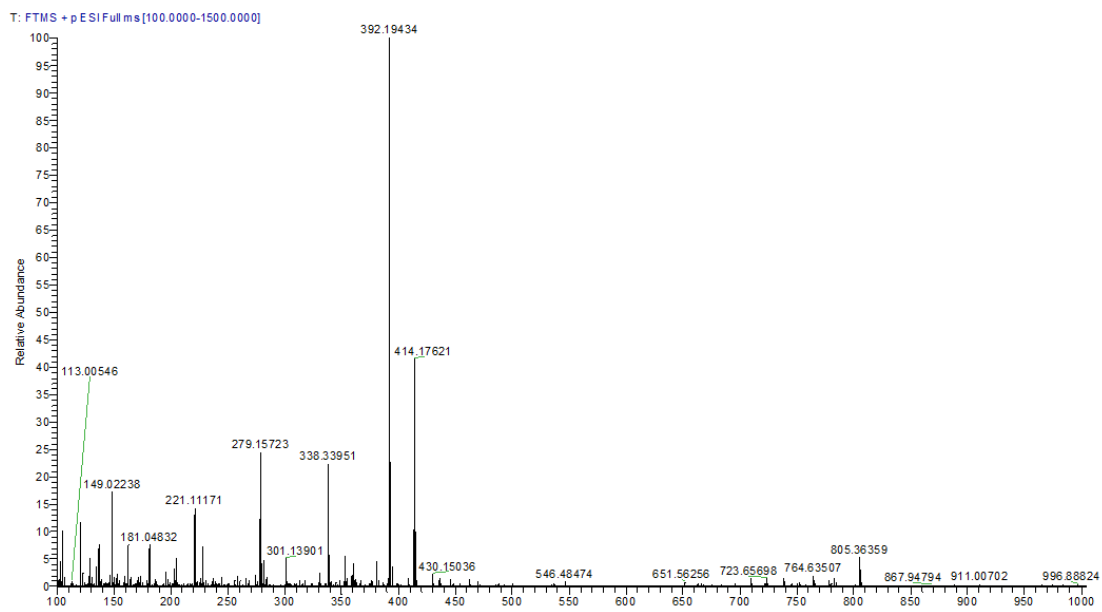

HRMS spectrum of D26

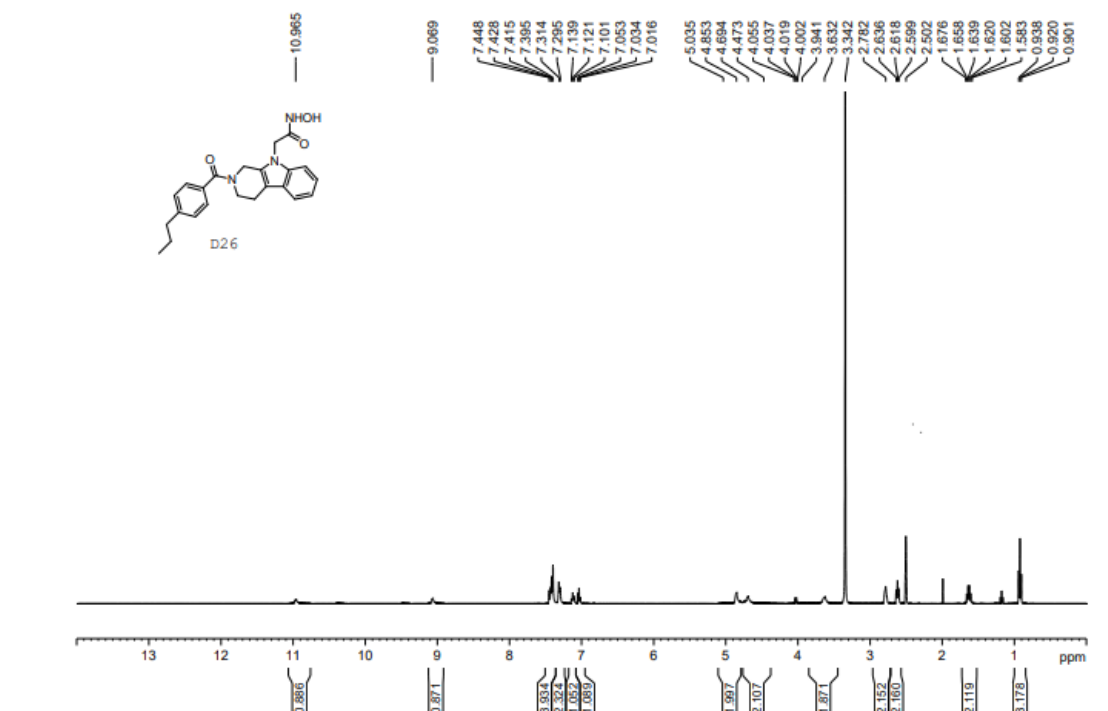

<sup>1</sup>H NMR spectrum of D26

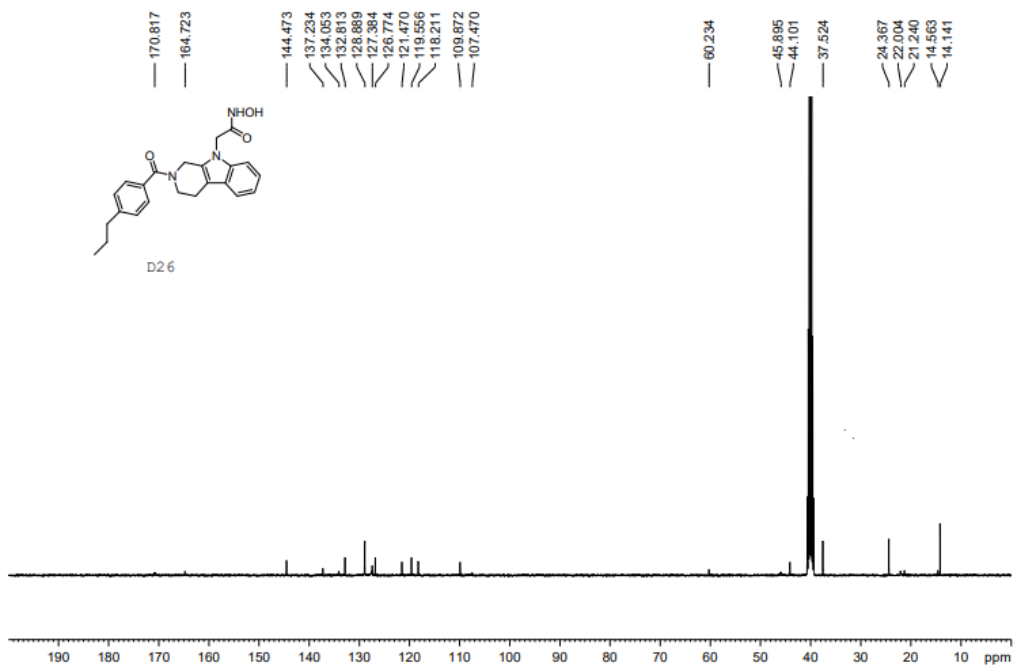

<sup>13</sup>C NMR spectrum of **D26**

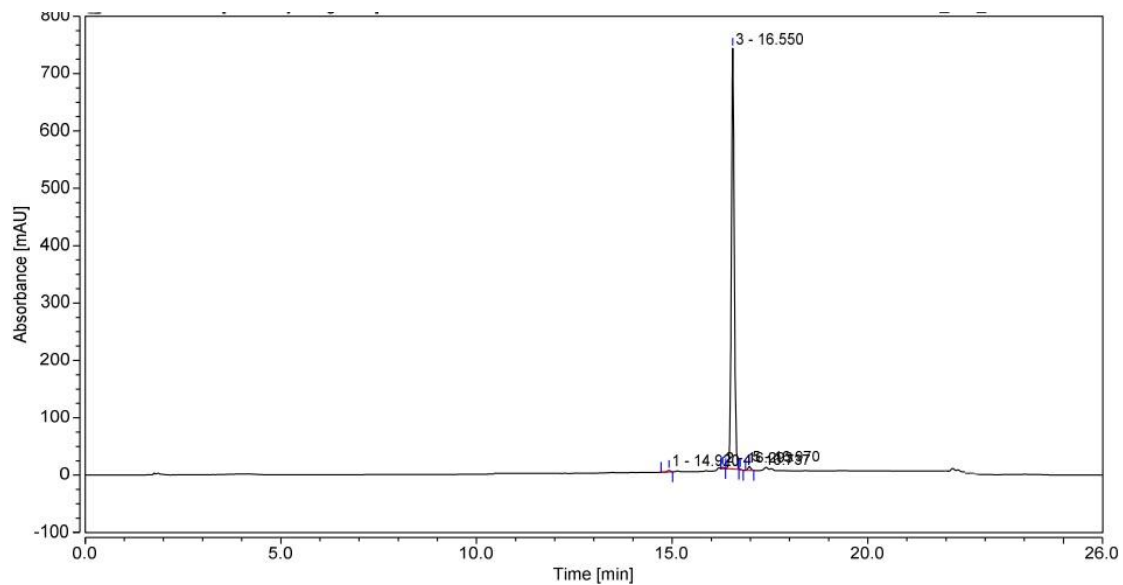

HPLC spectrum of **D26**



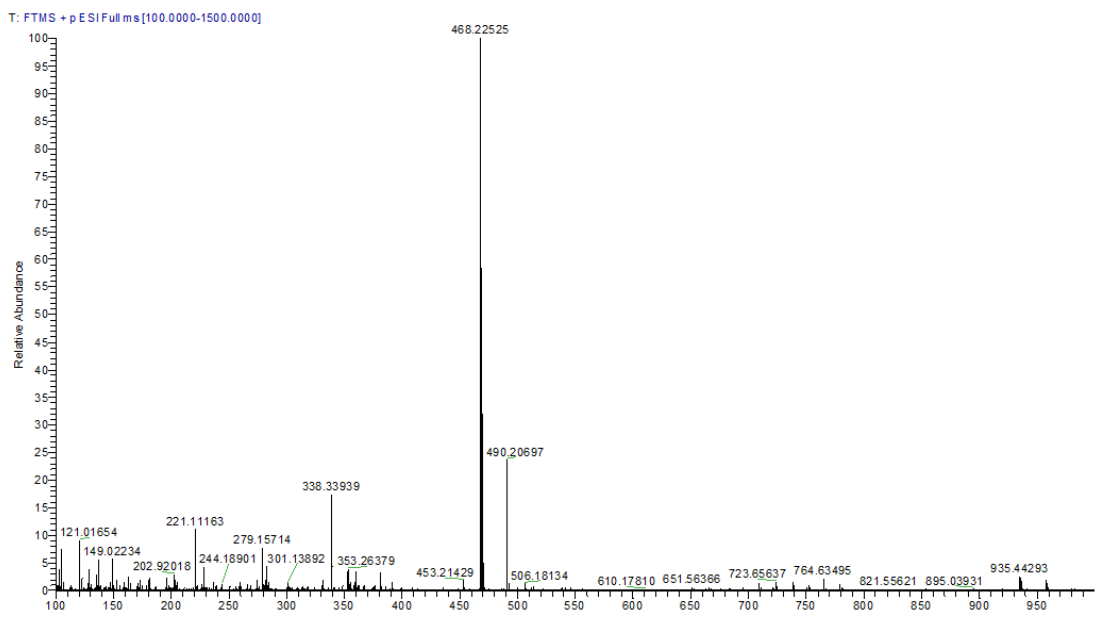

HRMS spectrum of D27

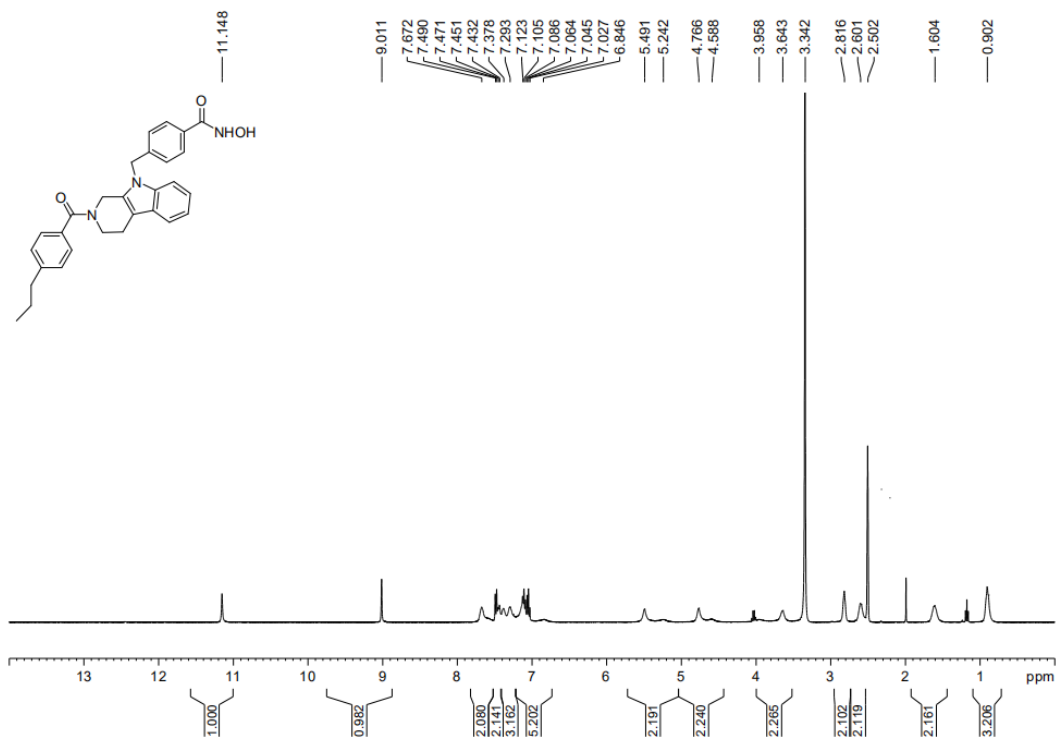

<sup>1</sup>H NMR spectrum of D27

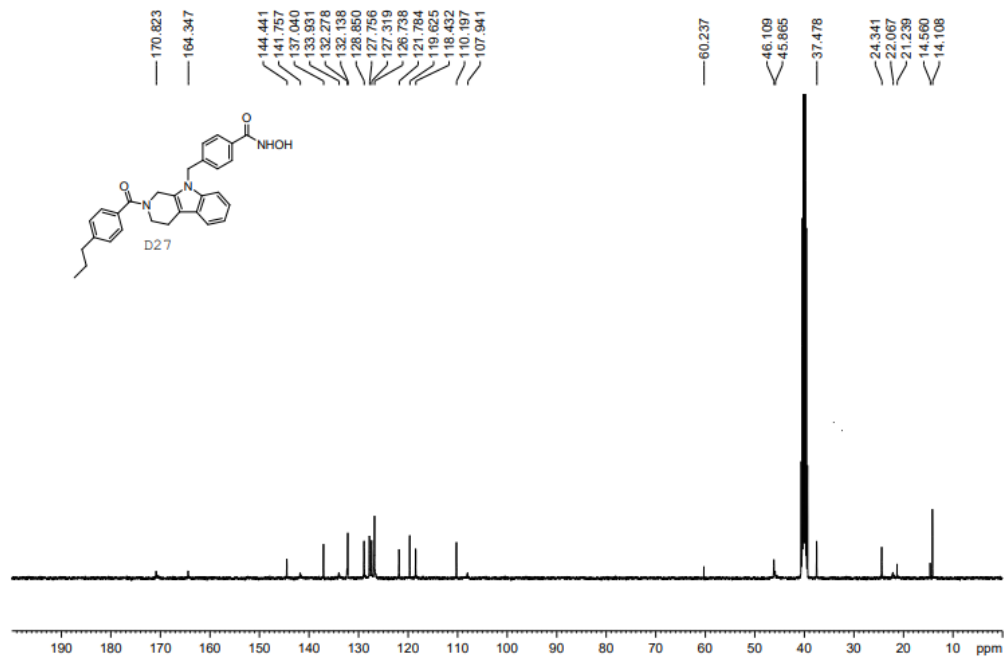

<sup>13</sup>C NMR spectrum of **D27**

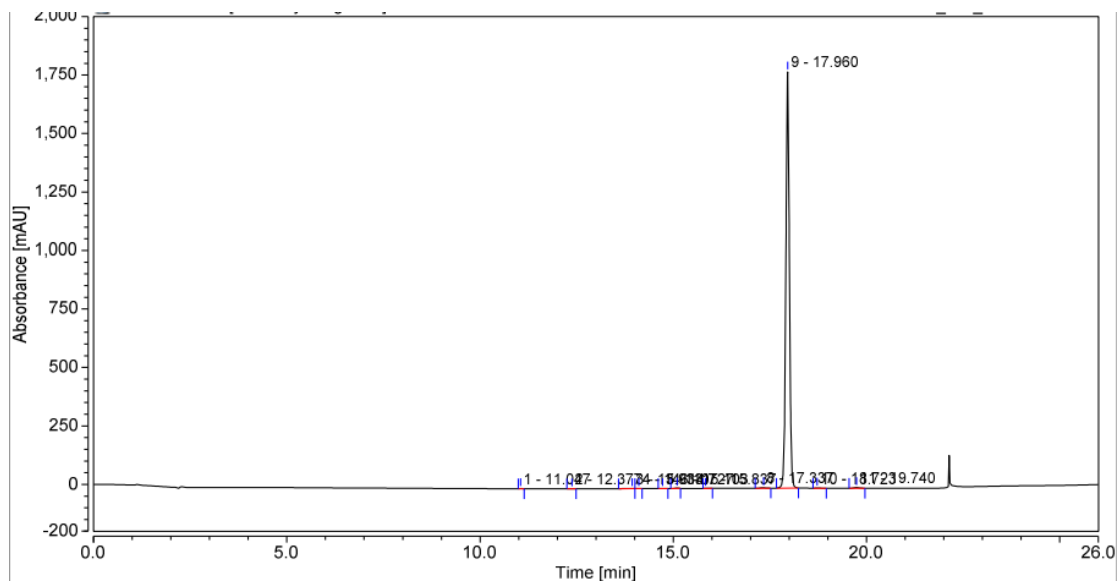

HPLC spectrum of **D27**

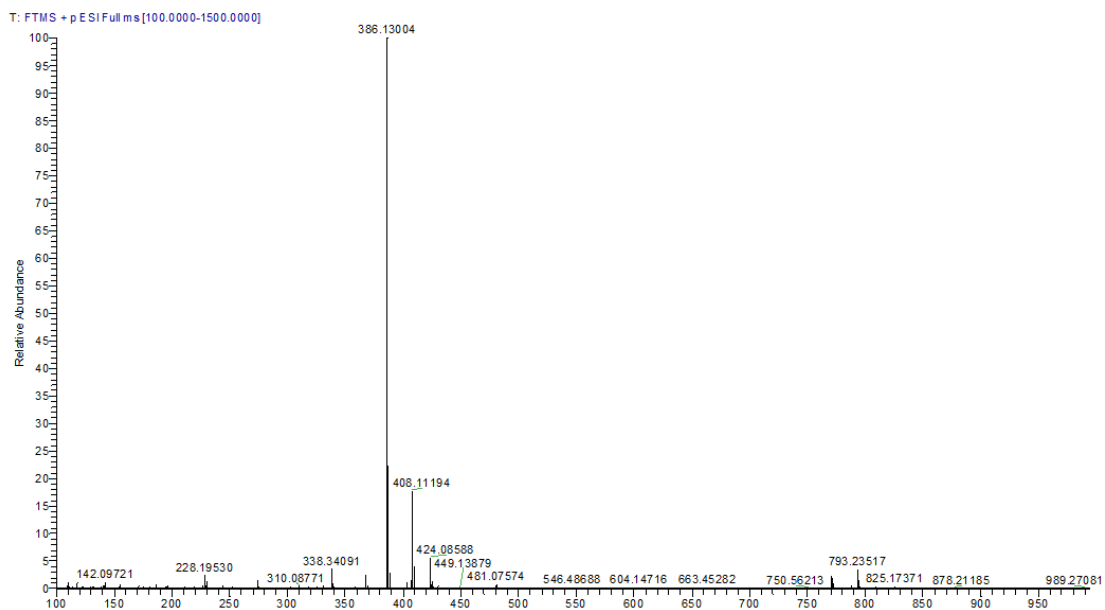

HRMS spectrum of D28

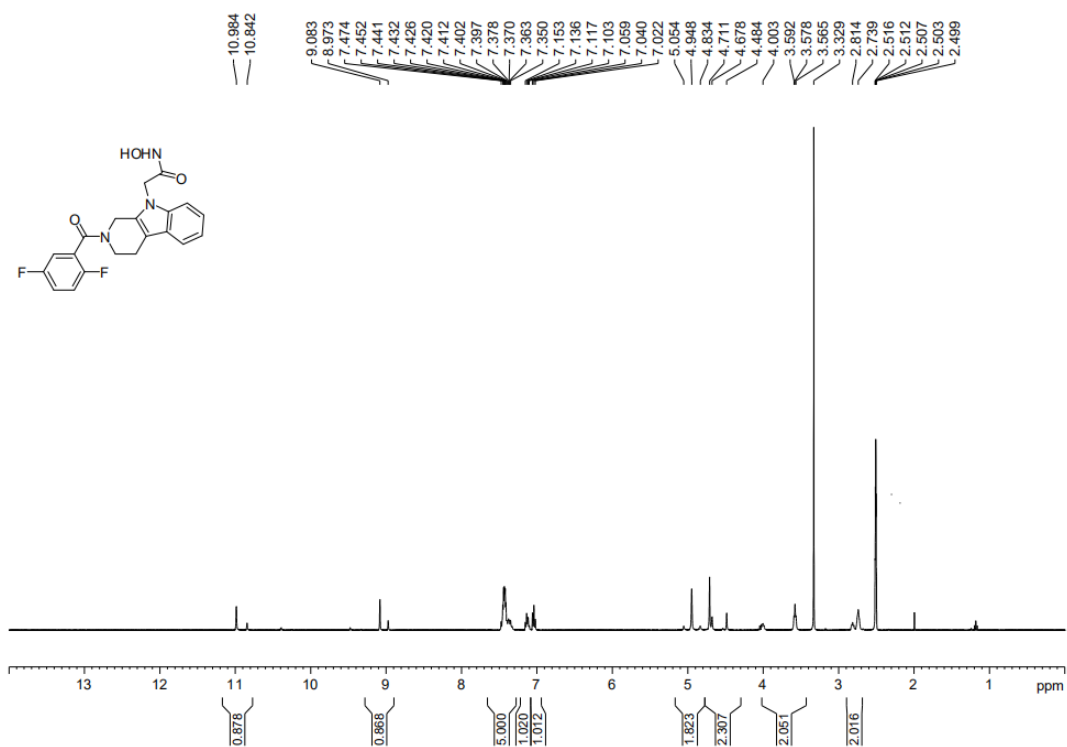

<sup>1</sup>H NMR spectrum of D28

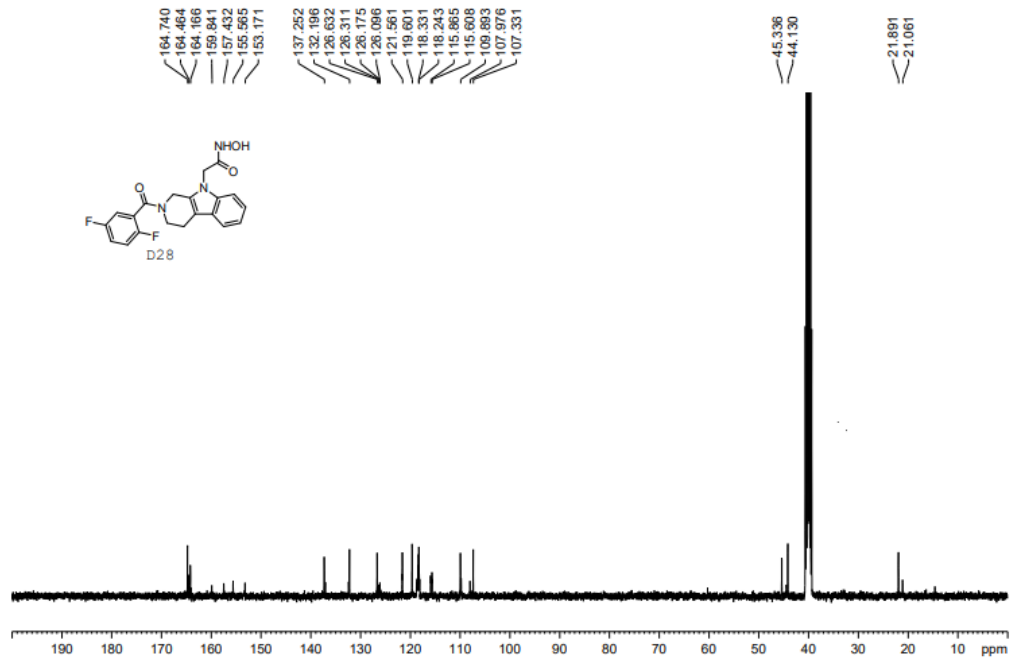

<sup>13</sup>C NMR spectrum of **D28**

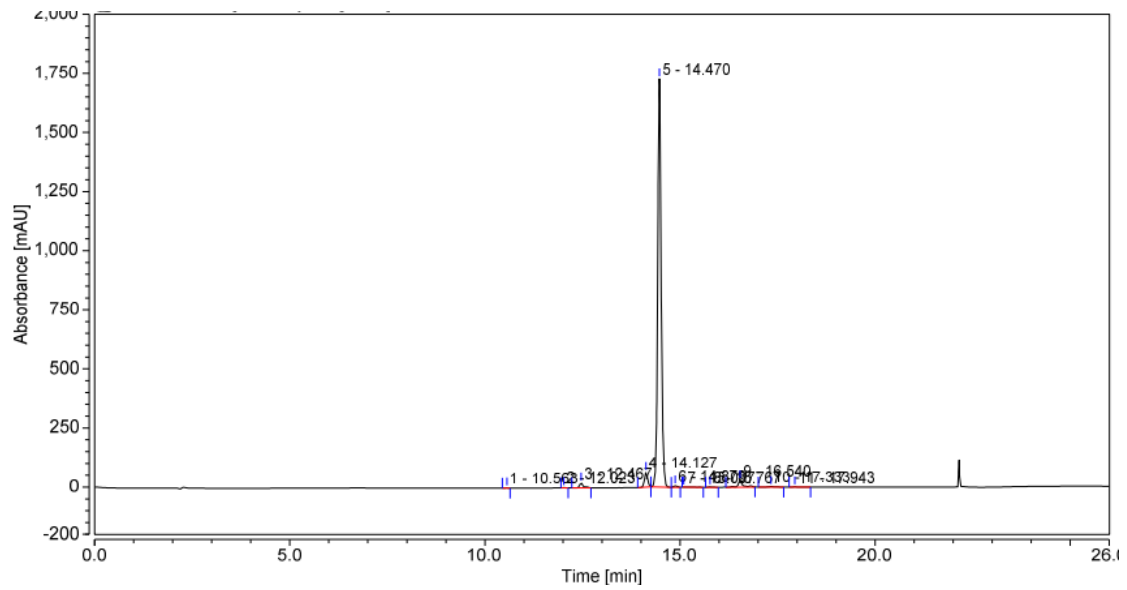

HPLC spectrum of **D28**

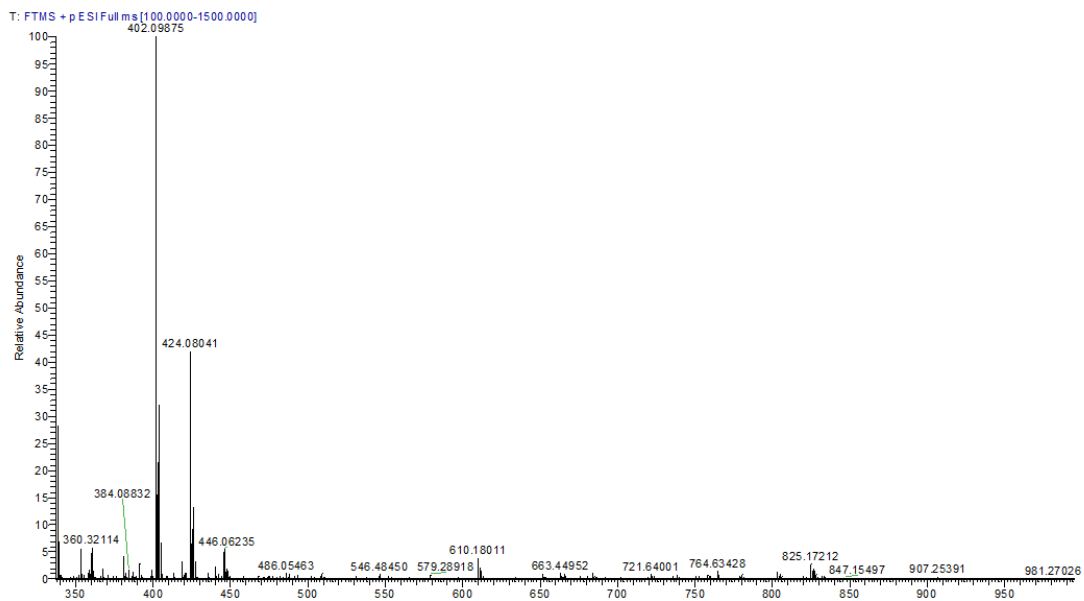

HRMS spectrum of **D29**

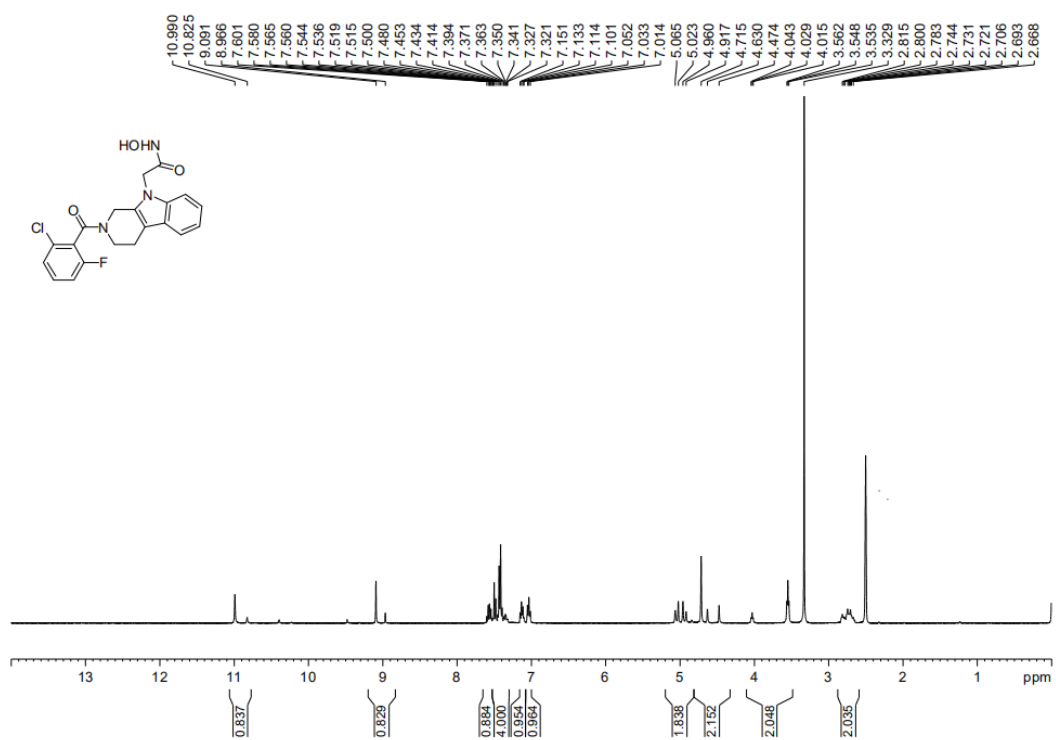

$^1\text{H}$  NMR spectrum of **D29**

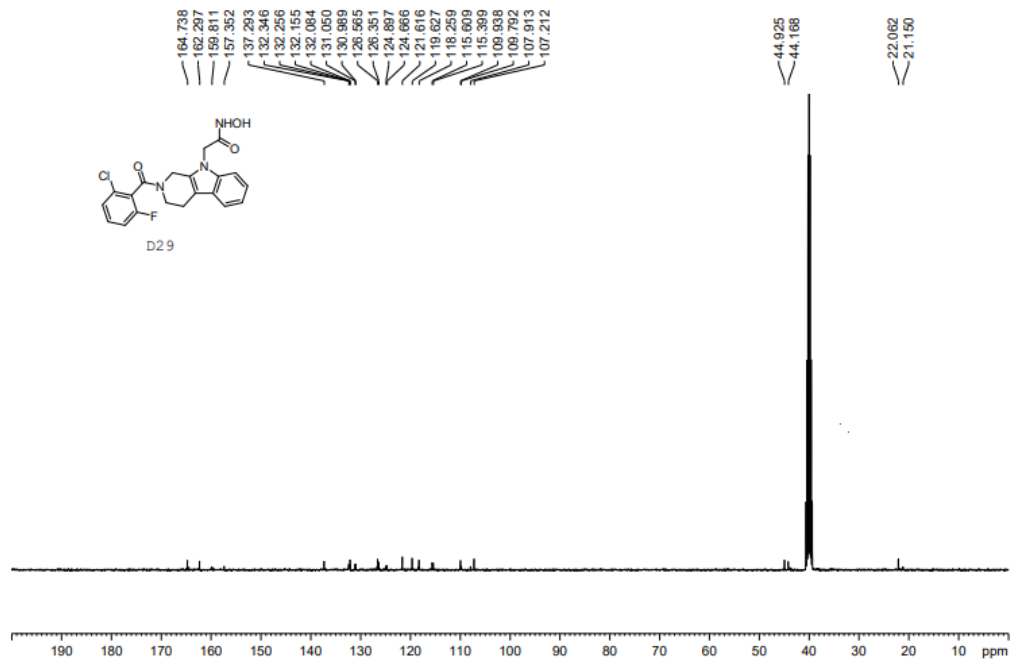

<sup>13</sup>C NMR spectrum of D29

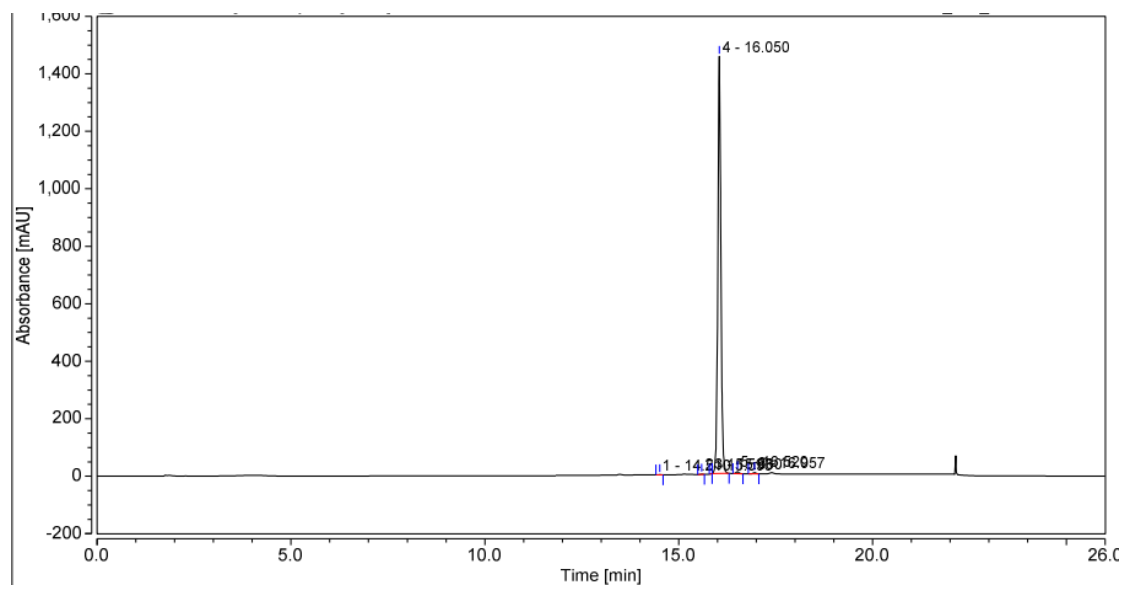

HPLC spectrum of D29
